# Supplementary material for: Women’s satisfaction with the quality of antenatal care services rendered at public health facilities in Northwest Ethiopia: the application of partial proportional odds model
Source: PubMed Central journal article supplement — BMJ Open. 2020 Sep 17;10(9):e037085. doi: 10.1136/bmjopen-2020-037085 (PMC7500293; doi:10.1136/bmjopen-2020-037085), 2020-09-17
Supplement: bmjopen-2020-037085.draft_revisions.pdf [file bmjopen-2020-037085.draft_revisions.pdf]

# BMJ Open

BMJ Open is committed to open peer review. As part of this commitment we make the peer review history of every article we publish publicly available.

When an article is published we post the peer reviewers' comments and the authors' responses online. We also post the versions of the paper that were used during peer review. These are the versions that the peer review comments apply to.

The versions of the paper that follow are the versions that were submitted during the peer review process. They are not the versions of record or the final published versions. They should not be cited or distributed as the published version of this manuscript.

BMJ Open is an open access journal and the full, final, typeset and author-corrected version of record of the manuscript is available on our site with no access controls, subscription charges or pay-per-view fees (<http://bmjopen.bmj.com>).

If you have any questions on BMJ Open's open peer review process please email [info.bmjopen@bmj.com](mailto:info.bmjopen@bmj.com)

# BMJ Open

## Women's Satisfaction with the Quality of Antenatal Care Services Rendered at Governmental Health Facilities in Northwest Ethiopia: the application of partial proportional odds model

|                               |                                                                                                                                                                                                              |
|-------------------------------|--------------------------------------------------------------------------------------------------------------------------------------------------------------------------------------------------------------|
| Journal:                      | <i>BMJ Open</i>                                                                                                                                                                                              |
| Manuscript ID                 | bmjopen-2020-037085                                                                                                                                                                                          |
| Article Type:                 | Original research                                                                                                                                                                                            |
| Date Submitted by the Author: | 22-Jan-2020                                                                                                                                                                                                  |
| Complete List of Authors:     | Emiru, Amanu; Bahir Dar University, Reproductive Health and Population Studies<br>Alene, GD; Bahir Dar University, Epidemiology and Biostatistics<br>Tura, G; Jimma University, Population and Family Health |
| Keywords:                     | Antenatal < GENETICS, Quality in health care < HEALTH SERVICES ADMINISTRATION & MANAGEMENT, Organisation of health services < HEALTH SERVICES ADMINISTRATION & MANAGEMENT                                    |
|                               |                                                                                                                                                                                                              |

SCHOLARONE™  
Manuscripts

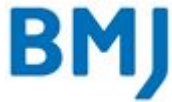

I, the Submitting Author has the right to grant and does grant on behalf of all authors of the Work (as defined in the below author licence), an exclusive licence and/or a non-exclusive licence for contributions from authors who are: i) UK Crown employees; ii) where BMJ has agreed a CC-BY licence shall apply, and/or iii) in accordance with the terms applicable for US Federal Government officers or employees acting as part of their official duties; on a worldwide, perpetual, irrevocable, royalty-free basis to BMJ Publishing Group Ltd ("BMJ") its licensees and where the relevant Journal is co-owned by BMJ to the co-owners of the Journal, to publish the Work in this journal and any other BMJ products and to exploit all rights, as set out in our [licence](#).

The Submitting Author accepts and understands that any supply made under these terms is made by BMJ to the Submitting Author unless you are acting as an employee on behalf of your employer or a postgraduate student of an affiliated institution which is paying any applicable article publishing charge ("APC") for Open Access articles. Where the Submitting Author wishes to make the Work available on an Open Access basis (and intends to pay the relevant APC), the terms of reuse of such Open Access shall be governed by a Creative Commons licence – details of these licences and which [Creative Commons](#) licence will apply to this Work are set out in our licence referred to above.

Other than as permitted in any relevant BMJ Author's Self Archiving Policies, I confirm this Work has not been accepted for publication elsewhere, is not being considered for publication elsewhere and does not duplicate material already published. I confirm all authors consent to publication of this Work and authorise the granting of this licence.

1  
2  
3 Women's Satisfaction with the Quality of Antenatal Care Services Rendered at  
4 Governmental Health Facilities in Northwest Ethiopia: the application of partial  
5 proportional odds model  
6  
7  
8  
9

10 **Authors:**

11 Amanu Aragaw Emiru<sup>1</sup>

12 Getu Degu Alene<sup>2</sup>

13 Gurmesa Tura Debelew<sup>3</sup>

14  
15  
16  
17  
18  
19 **Author Affiliation and Addresses:**

20  
21 <sup>1</sup>Department of Reproductive Health and Population Studies, College of Medicine and Health  
22 sciences, Bahir Dar University, Bahir Dar, Ethiopia. Email: [amanuaragaw@yahoo.com](mailto:amanuaragaw@yahoo.com)

23  
24 <sup>2</sup>Department of Epidemiology and Biostatistics, College of Medicine and Health sciences, Bahir  
25 Dar University, Bahir, Ethiopia. Email: [adgetu123@yahoo.com](mailto:adgetu123@yahoo.com)

26  
27 <sup>3</sup> Department of Population and Family Health, Faculty of Public Health, Institute of Health,  
28 Jimma University, Jimma, Ethiopia. Email: [gurmesatura@gmail.com](mailto:gurmesatura@gmail.com)

29  
30  
31  
32  
33 **Corresponding author:**

34 Amanu Aragaw Emiru: postal address 79; email: [amanuaragaw@yahoo.com](mailto:amanuaragaw@yahoo.com); Telephone; +251-  
35 918780295  
36  
37  
38  
39  
40  
41

42 **Keywords:** antenatal, quality, structure, process, satisfaction  
43  
44  
45  
46

47 **Word count** (excluding title page, abstract, references, figures and tables): 3,935  
48  
49  
50  
51  
52  
53  
54  
55  
56  
57

## ABSTRACT

**Objectives:** We assessed the readiness of health facilities to deliver routine antenatal care; the providers' competences during antenatal consultation; and women's satisfaction with the antenatal care received and its determinants.

**Design:** Cross-sectional

**Setting:** Northwest Ethiopia

**Participants:** 795 pregnant women attending the antenatal clinics at 15 public health facilities and 41 health workers working for the surveyed facilities.

**Outcome measures:** The outcome variable was women's satisfaction with antenatal care. The outcome was generated from multiple satisfaction items using principal component analysis on an ordered, categorical, and three-point Likert scale. The key hypothesized factors considered were structural and process aspects of care. Data were analyzed using the partial proportional odds model with 95%CI.

**Results:** The result revealed that only 30.3% of the pregnant women were highly satisfied while 31.7% rated the services as unsatisfactory. The findings showed that process quality indicators better-predicted client satisfaction. In relation to this, better scores in history taking [ $OR_1=OR_2$ ; 1.81 (95% CI 1.25, 2.60)], counseling [ $OR_1 = OR_2$ ; 1.89 (95% CI 1.33, 2.69)], and screening [ $OR_1=OR_2$ ; 18.10 (95% CI 11.52, 28.39)] were associated with achieving higher satisfaction. We also observed significant but lower satisfaction among women in the late trimester of pregnancy [ $OR_1 = OR_2$ ; 0.87 (95% CI 0.78, 0.97)]. However, we get hardly any significant relationship between structural attributes and client satisfaction.

**Conclusions:** The study demonstrated that women's satisfaction with antenatal care was low. The contents of antenatal services covered during client-provider interaction were the main factors affecting client satisfaction. This suggests that efforts are required to improve the competencies of health professionals to make them more effective while dealing with clients

### Strengths and limitations of this study

- We tried to assess the three aspects of quality: structure, process, and outcomes
- The study has utilized different data collection methods including facility audit, client exit interview, provider interview, and direct observation.
- The analysis considered the ordered nature of the outcome variable; previous studies often dichotomized satisfaction at the cost of losing information
- However, the presence of an observer during the client-provider interaction may bias the results obtained in a positive direction.

### INTRODUCTION

In the past two decades, concerted global efforts have led to increased coverage of maternal health services, even in poor resource settings [1 2]. Yet, improvements in health outcomes did not always follow[2]. Every year, thousands of women die from pregnancy-related complications worldwide[3 4], with 99% of those deaths occur in developing nations including Ethiopia[5].

However, most maternal deaths are not inevitable as health solutions to the causes of complications are well-known [3 6]. The solution includes a strong health system that provides maternal services based on a continuum of care perspective [3]. As part of the continuum, the essence of antenatal care (ANC) is to serve as a platform for important health care activities [3 7] including health promotion and disease prevention, screening and diagnosis of pregnancy-related complications [8 9]. As such, antenatal care creates a unique opportunity for early detection and management of hypertension, gestational diabetes, anemia, malaria, HIV, and other health conditions which otherwise would jeopardize the health of mothers and the growing fetus[10 11].

Evidence has long demonstrated that in the presence of adequate healthcare services and community health workers, there is an opportunity to improve health service utilization and maternal health outcomes[2 12]. In this regard, the government of Ethiopia has made significant strides towards availing health facilities closer to the community, mainly through constructing primary health care facilities and launching a health extension program at the community level [13]. Establishing a voluntary based Women Health Development Army (WHDA) and eliminating

1  
2  
3 user charges for maternity services were also among the many efforts. To this effect, 16,440 health  
4 posts, 3,547 health centers, and 311 hospitals have been constructed over the past 20 years [14].  
5  
6

7 While health facility expansion is a welcome development in Ethiopia, many health facilities are  
8 opened without the necessary materials and skilled manpower [15]. For example, while 80 percent  
9 of the facilities delivered antenatal care, only 41 percent of them were in a position to provide  
10 quality service [16]. This is why, the use of maternal services including antenatal care is low, and  
11 maternal mortality stands at 412 deaths per 100,000 live births [17]. Indeed, the degree to which a  
12 woman can gain access to maternity services is not merely dependent on the availability of services  
13 but also on the content and quality of care [13 4].  
14  
15  
16  
17  
18  
19

20 The term quality of care is used widely as a key performance indicator [4 18], but there is no  
21 comprehensive instrument to measure quality [4]. Donabedian, defined quality in terms of three  
22 major attributes: the structure (resources and organizational structure in health care setting),  
23 process (how health service is delivered) and outcome (effect of care on the status of the clients)  
24 [19]. According to this model, the ultimate goal for quality is to produce client satisfaction and,  
25 therefore, was the main framework of reference for our study in assessing the quality of ANC care  
26 and client satisfaction.  
27  
28  
29  
30  
31

32 A body of literatures have examined the quality of antenatal care in Ethiopia, yet hardly was any  
33 published data that examined all the dimensions of quality simultaneously. The available studies  
34 focused primarily on the availability of facility in puts[20] or the number of health facility visits  
35 by pregnant women [21-23], which largely overlooked the information on how care was delivered  
36 and what those visits contained [24].  
37  
38  
39  
40  
41

42 To this end, we aimed to assess the capacity of public health facilities to deliver quality antenatal  
43 care, the completeness of provider-client consultation process, and client satisfaction with the  
44 services received.  
45  
46  
47

## 48 **METHODS**

### 49 **Study design and setting**

50  
51 This was a cross-sectional study using a facility survey, direct observation, and exit interview  
52 methods. The study was undertaken in five districts of West Gojjam Zone, Northwest Ethiopia  
53  
54  
55  
56  
57

1  
2  
3 from July to August 2018. At the time of the survey, the Zone had a population of 2,611,925  
4 people with women of reproductive age (15-49) making 23.58 % of the population. The zone had  
5 6 governmental hospitals, 103 health centers, and 374 health posts. In addition, it had 114 private  
6 clinics and 1 hospital. All maternal health services including antenatal care were provided free of  
7 charge in public health facilities [25].  
8  
9

### 10 11 12 **Study population and sampling**

13  
14  
15 The population consisted of public health facilities that provided ANC, pregnant women attending  
16 ANC clinic, maternal health care providers, and health authorities working for the surveyed health  
17 facilities.  
18  
19

20  
21 A sample size of 824 was determined for exit interview and observational studies using the formula  
22 for single population proportion based on the assumptions: 95% confidence level; 5% margin of  
23 error, 42% service availability and readiness of public facilities in Ethiopia [16], design effect of  
24 2, and a 10% non-response rate.  
25  
26  
27

28  
29 A multi-stage sampling approach was used to select study participants. In the first stage, five  
30 districts were selected using simple random sampling technique. Next, fifteen health facilities,  
31 consisting of five district hospitals and ten public health centers, were sampled randomly. From  
32 the sampled facilities, 795 women were selected using a systematic sampling procedure with  
33 probability to proportional size method.  
34  
35  
36

### 37 **Data collection**

38  
39 In this study, an attempt was made to measure all dimensions of the quality of ANC services:  
40 structure, process, and outcome. For each dimension of quality, a set of questions were adapted  
41 from the WHO guidelines [3 12], the Ethiopian demographic and health survey[17], and the list of  
42 interventions recommended by the federal ministry of health of Ethiopia [26].  
43  
44  
45

46  
47 The survey comprised four main data collection methods: 1) Health facility surveys; 2) provider  
48 interview;3) direct observation of ANC consultations; and 4) exit interview with pregnant women.  
49 While structured and pre-tested questionnaires were used as a tool for provider and exit client  
50 interviews, checklists were used in the facility survey and observation study.  
51  
52  
53  
54  
55  
56  
57



1  
2  
3 Experienced midwives who were not affiliated with the surveyed healthcare facilities collected the  
4 data. In each health facility, a team consisting of two data collectors was assigned. While one of  
5 the team members was responsible to carry out the observational study and facility survey, the  
6 other was responsible for managing the exit interview.  
7  
8  
9

10 A facility survey of all the selected facilities was carried out to assess the availability of essential  
11 materials and staffing. A non-participatory observation was also undertaken among 41 maternal  
12 health workers who were working at the ANC clinic during the time of the survey. This was aimed  
13 to evaluate whether health care workers conformed in conducting key ANC tests or examinations.  
14 Following her consultation, each pregnant woman was interviewed at the exit to assess the level  
15 of satisfaction on the service she received.  
16  
17  
18  
19  
20

## 21 **Variables and Measurement**

22 Structural quality was calculated at the facility level, while indices for process attributes and client  
23 satisfaction were made at individual women level.  
24  
25  
26

### 27 **Structure and process attributes**

28 In assessing the availability of physical infrastructure, essential equipment, drugs, diagnostic tests,  
29 and staffing indices for each of them were generated. The level of staffing at each health facility  
30 was compared to the recommendation of the Ethiopian Standard Agency[27 28]. All these five  
31 structural constructs were measured using multiple variables, and each variable was granted a  
32 score of “1” if present, and “0” if absent. To generate an index, the variable used to assess each  
33 construct was scored and then the sum of the scores was obtained in each construct. Finally, we  
34 categorized the indices given into three, poor, fair, and good considering the WHO criteria [29].  
35  
36  
37  
38  
39  
40

41 A similar approach was also used for the generation of indices for the components of process  
42 attributes namely, interpersonal communication, history taking, clinical examination, counseling,  
43 and health screening.  
44  
45

46 The Cronbach’s alpha was used to measure the internal consistency of a set of items for the three  
47 quality dimensions, and a reliability coefficient of 0.70 or higher was considered acceptable[30].  
48  
49  
50

51 **Outcome variable:** the outcome variables, overall client satisfaction was measured by aggregating  
52 women’s responses to questions regarding the visit into a three scale index using a principal  
53 components analysis: 0-50% as ‘low satisfaction’(coded 1), 51-79%(coded 2) as having ‘moderate  
54 satisfaction’, and 80-100 %(coded 3) as ‘high satisfaction’  
55  
56  
57

## Data analysis

Data collected were entered using the Epiinfo software (7.0 version) and analyzed using STATA 14.0. Given the ordinal nature of the outcome variable, a typical approach is to use the standard ordered logit [31]. Yet, the Brant test revealed that the proportional odds assumptions were violated for some independent variables ( $\chi^2=63.4$  df (16);  $p< 0.001$ ).

We, therefore, used generalized ordered logistic regression with autofit, also called partial proportional odds model). This model takes into account the ordinal nature of satisfaction as the dependent variable while at the same time allowing for possible violation of the proportional odds assumption. Hence, coefficients of variables for which the proportionality assumptions are met are constrained while allowing the coefficients of the variables for which proportionality assumptions are not met to vary with the point at which the categories of the dependent variable is dichotomized[31].

Moreover, multi-collinearity test between the independent variables was performed using the Variance Inflation Factor (VIF), and no problem was found (the highest value was 2.7).

## Patient and public involvement

Patients/public were not involved in setting the research question or the outcome measures, and in the design and implementation of the study. Participation was voluntary based and no incentives were provided. The findings of this study will be disseminated to policy-makers and local-level service implementers.

## RESULTS

### General characteristics of women

Out of 824 eligible clients, 795 enrolled in the study yielding a response rate of 96.5%. The highest percentage of women were rural residents 575 (72.3%), and belonging to the age range of 20-29 years 433(54.5%). Regarding their age, the mean and standard deviation were 27.8 and 5.9 years, respectively. Of the total respondents, 63.4% did not attend formal education.

About one-third of the participants, 274(34.5) were first-time visitors for ANC, and more than half (52.7% %) of them booked between 3 and 6 months after conception (Table 1).

Table1: Background characteristics of ANC clients interviewed in public health facilities of West Gojjam Zone, Northwest Ethiopia (N=795)

| Description                       | Number | Percent |
|-----------------------------------|--------|---------|
| Address                           |        |         |
| Urban                             | 220    | 27.7    |
| Rural                             | 575    | 72.3    |
| Age (Years)                       |        |         |
| 15-19                             | 91     | 11.4    |
| 20-29                             | 433    | 54.5    |
| 30-39                             | 236    | 29.7    |
| 40+                               | 35     | 4.4     |
| Education                         |        |         |
| No formal Education               | 504    | 63.4    |
| Primary Education (Grade 1-8)     | 212    | 26.7    |
| Secondary education and above     | 79     | 9.9     |
| Occupation                        |        |         |
| Farmer                            | 575    | 72.3    |
| Employee                          | 35     | 4.4     |
| Merchant                          | 53     | 6.7     |
| Daily laborer                     | 18     | 2.3     |
| Others(*including Housewives)     | 114    | 14.3    |
| Parity                            |        |         |
| Nulliparous                       | 182    | 22.9    |
| Primipara                         | 190    | 23.9    |
| Para 2-4                          | 321    | 40.4    |
| Para 5+                           | 102    | 12.8    |
| Gestational Age at time of survey |        |         |
| 0-3 months                        | 79     | 9.9     |
| 4-7 months                        | 562    | 70.7    |
| >=8 months                        | 154    | 19.4    |
| Number of ANC visits              |        |         |
| 1                                 | 274    | 34.5    |
| 2-3                               | 436    | 54.8    |
| 4+                                | 85     | 10.7    |
| Timing of first ANC visit         |        |         |
| First trimester                   | 332    | 41.8    |
| Second Trimester                  | 419    | 52.7    |
| Third Trimester                   | 44     | 5.5     |
| Distance to HCF                   |        |         |
| Less than 1 hour                  | 532    | 66.9    |
| Greater or equal to 1 hour        | 263    | 33.1    |

### Health workers *background* characteristics

As can be seen in table 2, Forty-one health workers who worked for 15 health facilities were included in the study. The largest number of health workers observed in any one-health facility

was four and the smallest was one. Most of the health providers were men (61%). The median age of these health professionals was 29.0 years (Range: 23 to 36 years of age) and the median number of years of professional experience was 3.0 years (Range: 1 to 12 years). This is an indication that most of the providers had worked in their organization long enough to understand and give credible information to pregnant women (Table 2).

Table 2: Background characteristics of maternal health workers in public health facilities of West Gojjam Zone, Northwest Ethiopia (N=41)

| Characteristics                                              | Number            | Percent |
|--------------------------------------------------------------|-------------------|---------|
| Sex of the provider                                          |                   |         |
| Male                                                         | 25                | 61      |
| Female                                                       | 16                | 39      |
| Median Age (Range)                                           | 29.0(23-36 years) |         |
| Median Experience (Range)                                    | 3.0(1-12 years)   |         |
| Training received on;                                        |                   |         |
| ANC screening                                                | 22                | 53.7    |
| Counseling                                                   | 21                | 51.2    |
| BEmONC                                                       | 27                | 65.9    |
| Hypertension management                                      | 20                | 48.8    |
| HIV/PMTCT                                                    | 32                | 78.0    |
| CRC                                                          | 18                | 43.9    |
| Personally supervised by the supervisor in the last 3 Months |                   |         |
| Yes                                                          | 15                | 36.6    |
| No                                                           | 26                | 63.4    |

### Structural quality attributes

The analysis presented in table 3 characterizes the structural and process dimensions of quality. Despite there exists heterogeneity in the availability of different components, the overall scores of the facility surveys were reasonably good (70 %). Laboratory consumables were more likely to be available (80%) compared to other structural components. Nonetheless, the availability of infrastructure and general amenities was particularly deficient (59%). Some essential antenatal drugs such as magnesium sulfate, injectable antibiotics, and antihypertensive drugs were also no longer available during the time of the survey (64%).

The availability of basic antenatal care items on the day of the survey varied widely by type of facility, with hospitals generally having many of the items to provide comprehensive antenatal care. Some items were commonly available across facility types, such as suction apparatus (81.5%) and gloves (94.1 %). However, items such as manual vacuum extractor and calcium gluconate in

the health centers and insecticide-treated bed nets (ITNs) in hospitals were extremely deficient (the result not shown in the table).

### **Process quality attributes:**

#### **Interpersonal performance**

Generally, interpersonal aspects of quality were extremely low (average score of 60%), especially concerning warm greeting and welcoming the client (49.9%) and self-introduction of the provider (38.9%). However, this aspect was better in maintaining the privacy of women during the time of consultation (i.e. both visual and auditory), which was observed in 80% of the consultations.

#### **Technical performances**

The number of essential ANC services received by the surveyed women, on average, was inadequate (60%). Looking in detail at the results of different dimensions, we found that some technical performance aspects scored poorly, especially health screening (63%) and counseling (69%). At 73%, however, the general history of the pregnant women was rather better.

There were variations in the frequency of carrying out clinical examination and screening tests. While some examinations were done regularly (e.g., weighing, blood pressure, and abdominal palpation), others were done less often. For example, only 64% of the women were checked for anemia. Regrettably, only 2.3% of them received all eight essential health-screening tests and preventive medicines recommended by the Federal Ministry of Health of Ethiopia. Among all the tests and interventions, screening for asymptomatic bacteriuria (31.5%) and intervention for deworming (17.7%) were the lowest, compared to the HIV test (93%).

Table3: Results of structural and process quality components of antenatal care in selected public health facilities of Northwest Ethiopia, 2018

| ANC Quality Dimension | Subgroups                   | Mean Quality score |
|-----------------------|-----------------------------|--------------------|
|                       | Minimum: 0.00-Max: 1.00     |                    |
|                       | Number of health facilities | 15                 |

|                                                           |                                                 |             |
|-----------------------------------------------------------|-------------------------------------------------|-------------|
| <b>Structural Attributes<br/>(Health facility survey)</b> | Availability of infrastructure                  | 0.59        |
|                                                           | Availability of Essential Equipment             | 0.77        |
|                                                           | availability of staff, guidelines, and job-aids | 0.71        |
|                                                           | drugs and vaccines                              | 0.64        |
|                                                           | diagnostic tests/Lab Supplies                   | 0.80        |
|                                                           | <b>Total structural Score</b>                   | <b>0.70</b> |
| <b>Process Attributes<br/>(Observational studies)</b>     | Minimum: 0.00-Max: 1.00                         |             |
|                                                           | Number of pregnant women                        | 795         |
|                                                           | Interpersonal performance                       | 0.60        |
|                                                           | Technical skills                                | 0.69        |
|                                                           | - History taking                                | 0.73        |
|                                                           | - Clinical examination                          | 0.70        |
|                                                           | - Counseling                                    | 0.69        |
|                                                           | - Health screening and preventive measures      | 0.63        |
|                                                           | <b>Total process Score</b>                      | <b>0.65</b> |

### Client Satisfaction

The findings on the respondent level of agreement (expressed on a scale ranging from 1 to +5) on various aspects of antenatal care service satisfaction showed that women were satisfied very much on the advice they received about vaginal bleeding than others (mean score=3.71). On the other hand, respondents were highly dissatisfied with the information received about breastfeeding as shown by a mean of 2.54.

Overall scores among the respondents revealed that 241(30.3%) of the clients were highly satisfied, 302(38.0%) were moderately satisfied, and almost one-third, 252(31.7) percentage were unsatisfied. The mean satisfaction score was 3.11, which is approximately equivalent to neutral on the five-point Likert scale (Table 4).

Table4: level of satisfaction of pregnant women visiting public health care facilities in Northwest Ethiopia, 2018

| Satisfaction | Ve | sa | tis | in | dif | di | ss | Ve | M | ea | S | D |
|--------------|----|----|-----|----|-----|----|----|----|---|----|---|---|
|--------------|----|----|-----|----|-----|----|----|----|---|----|---|---|

| To what extent you agree with the following statements:                               | ry sat isf ified | ferred | nt  | ati sfi ed | ry diss atisf | n    |       |
|---------------------------------------------------------------------------------------|------------------|--------|-----|------------|---------------|------|-------|
| The health workers in this facility are very friendly and approachable                | 54               | 455    | 270 | 16         | 0             | 3.69 | 0.626 |
| The health staff are courteous and respectful                                         | 36               | 324    | 337 | 91         | 7             | 3.37 | 0.778 |
| The treatment and/or advice I received from the health worker is optimal              | 29               | 226    | 391 | 107        | 42            | 3.12 | 0.874 |
| The provider gives me opportunities to express the concerns I have                    | 16               | 194    | 429 | 135        | 21            | 3.06 | 0.773 |
| The provider gave me chances to ask him/her questions                                 | 13               | 170    | 386 | 185        | 41            | 2.91 | 0.843 |
| I am well informed on the birth preparedness                                          | 4                | 140    | 473 | 168        | 10            | 2.95 | 0.675 |
| I am informed about breastfeeding after birth                                         | 0                | 17     | 446 | 278        | 54            | 2.54 | 0.654 |
| I am told about how to recognize and proceed in case of vaginal bleeding              | 41               | 500    | 238 | 15         | 1             | 3.71 | 0.595 |
| I am told about how to recognize and proceed in case of fever                         | 5                | 228    | 358 | 146        | 58            | 2.97 | 0.887 |
| I'm told about how to recognize and proceed in case of premature uterine contractions | 8                | 101    | 494 | 150        | 42            | 2.85 | 0.739 |
| I am told about how to recognize and proceed in case of severe headache               | 2                | 192    | 528 | 73         | 0             | 3.15 | 0.566 |
| I'm told about how to recognize and proceed in case of difficulty in breathing        | 5                | 102    | 552 | 119        | 17            | 2.95 | 0.622 |
| Average satisfaction                                                                  |                  |        |     |            |               | 3.11 | 0.72  |
| <b>Overall satisfaction</b>                                                           |                  |        |     |            |               |      |       |
| <b>High satisfaction</b>                                                              | 241 (30.3%)      |        |     |            |               |      |       |
| <b>Moderate satisfaction</b>                                                          | 302 (38.0%)      |        |     |            |               |      |       |
| <b>Low satisfaction</b>                                                               | 252 (31.7%)      |        |     |            |               |      |       |

### Factors associated with client satisfaction

Table 6 presents the results of the multivariable partial proportional odds regression model examining the determinants of the overall satisfaction of pregnant women on the antenatal healthcare service received. During the analysis, the three-scale dependent variable produced two panels: panel-one (i.e., low vs. moderate or high satisfaction); and panel two (low or moderate vs. high satisfaction). In each group, the lower values were recorded to “0”, while the highest values were recorded to “1” [31].

As can be seen in table 5, the Brant test of parallel lines assumption ( $\chi^2=63.4$  df (16);  $p < 0.001$ ) revealed that women’s education, number of ANC visits, distance to health facility, and index for clinical examination were the variables that failed to meet assumption. For these variables, the coefficient estimates and odds ratios were intended to differ in the two panels (categories).

Table 5: Brant test of parallel regression assumption using the 0.05 level of significance

| SN | Variables                                                  | P- value      |
|----|------------------------------------------------------------|---------------|
| 1  | Address                                                    | 0.5174        |
| 2  | Age of women                                               | 0.0760        |
| 3  | Educational status                                         | <b>0.0007</b> |
| 4  | Distance to health facility                                | <b>0.0036</b> |
| 5  | Number of live births                                      | 0.6005        |
| 6  | Gestational Age at the time survey                         | 0.1948        |
| 7  | Number of ANC visits                                       | <b>0.0075</b> |
| 8  | Service Year of the provider                               | 0.6578        |
| 9  | Supervision received by the provider                       | 0.1059        |
| 10 | Availability of Physical infrastructure( composite index ) | 0.2240        |
| 11 | Availability of essential drugs ( composite index )        | 0.3239        |
| 12 | Interpersonal communication ( composite index )            | 0.3559        |
| 13 | Skills in history taking ( composite index )               | 0.5167        |
| 14 | Skills in physical examination ( composite index )         | <b>0.0005</b> |
| 15 | Counseling skills ( composite index )                      | 0.8421        |
| 16 | Health Screening ( composite index )                       | 0.1398        |

**Note: A significant test statistic provides evidence that the parallel regression assumption has been violated.**

After controlling for other factors, significant differences in the ANC service satisfaction was observed by process quality indicators and sociodemographic factors. Residence, distance to clinic, women's, education, number of ANC visits, and gestational age appeared to be important predictors of satisfaction with antenatal care. Moreover, process quality indicators such as history taking, clinical examination, counseling, and health screening also remained significant in the final model ( $p < 0.05$ ).

The Cronbach's alpha values of the items included in the analysis for the three quality dimensions were 0.81 for the satisfaction items, and 0.74 for structural, and 0.74 for process attributes.

As women's educational status, number of ANC visits, distance to the healthcare facility, and clinical examination violated the proportional odds assumption (the Brant test),  $OR_1 \neq OR_2$  and separate interpretations at each category were therefore required for these variables. Hence,  $OR_1$



stands for panel one (low vs. moderate or high) while OR2 was for the second panel (low or moderate vs. high satisfaction

In this regard, women with better schooling, increased number of ANC visits, and those living within 60 minutes walking distance from the facility were significantly associated with increased odds of having moderate or high satisfaction [OR<sub>1</sub>=3.11(95% CI 2.02, 4.81)], [OR<sub>1</sub> = 4.16 (95% CI 1.66, 10.23)], and [OR<sub>1</sub> = 0.29 (95% CI 0.18, 0.46)], respectively. However, the estimates of these variables fall far short of statistical significance in the second ordinal regression category.

Likewise, better clinical examination score of the process dimension was positively and significantly associated with the two satisfaction categories [Low vs. moderate/high: OR<sub>1</sub> = 1.69 (95% CI 1.13, 2.54)], and [low/moderate vs.high:OR<sub>2</sub>=4.09(95%CI2.69, 6.24)]. As can be seen in the table, the effects became much stronger when satisfaction level moved from low to high.

However, variables that did not violate the assumption had a single beta coefficient at each of the two satisfaction categories; and hence a single OR<sub>1</sub> =2 was reported. Client satisfaction was associated with better process scores. Better scores in history taking [OR<sub>1</sub> = OR<sub>2</sub>; 1.81 (95% CI 1.25, 2.60)], counseling performance [OR<sub>1</sub> = OR<sub>2</sub>; 1.89 (95% CI 1.33, 2.69)], and health screening and preventive measures [OR<sub>1</sub> = 2; 18.10 (95% CI 11.52, 28.39)] were associated with achieving higher ANC satisfaction scores.

Similarly, being a rural resident was significantly associated with achieving a higher satisfaction score [OR<sub>1</sub>= OR<sub>2</sub>; 1.89 (95% CI 1.05, 3.41)]. For every one month increase in gestational age of pregnancy, however, the odds of being above a particular satisfaction category was decreased by a factor of 0.87[OR<sub>1</sub> = OR<sub>2</sub>; 0.87 (95% CI 0.78, 0.97)] (Table 6).

Table 6: multivariable partial proportional odds model showing factors affecting ANC satisfaction in West Gojjam Zone, Northwest Ethiopia, 2018(n=795)

| Explanatory | Multivariable gologit 2model, 95% CI |                        |
|-------------|--------------------------------------|------------------------|
|             | Panel One (1 Vs. 2 and 3)            | Panel Two (1or 2 Vs 3) |

| Variables                                         | OR 1 (95%CI)              | Coefficients not varying(OR1=OR2) | OR2(95%CI)                | Overall P-value(s) |
|---------------------------------------------------|---------------------------|-----------------------------------|---------------------------|--------------------|
| Education of women                                | <b>3.11(2.02,4.81)***</b> |                                   | 1.34(0.97,1.86)           | <b>0.001/0.073</b> |
| Number of ANC visits                              | <b>4.16(1.66,10.23)**</b> |                                   | 0.99(0.51,1.95)           | <b>0.002/0.996</b> |
| Walking distance to HCF                           | <b>0.29(0.18,0.46)***</b> |                                   | 0.64(0.39,1.04)           | <b>0.001/0.072</b> |
| Clinical examination                              | <b>1.69(1.13,2.54)*</b>   |                                   | <b>4.09(2.69,6.24)***</b> | <b>0.011/0.001</b> |
| Address                                           |                           | <b>1.89(1.05,3.41)*</b>           |                           | <b>0.035</b>       |
| Age                                               |                           | 1.10(0.80,1.50)                   |                           | 0.561              |
| Para                                              |                           | 0.80(0.63,1.01)                   |                           | 0.065              |
| Gestational at the time of the survey age(months) |                           | <b>0.87(0.78,0.97)**</b>          |                           | <b>0.01</b>        |
| Service year of provider (year)                   |                           | 0.99(0.93,1.07)                   |                           | 0.95               |
| Supervision received in the last 3 months         |                           | 1.34(0.80,2.26)                   |                           | 0.264              |
| Infrastructure                                    |                           | 0.78(0.56,1.08)                   |                           | 0.138              |
| Drug availability                                 |                           | 0.95(0.70,1.28)                   |                           | 0.728              |
| Interpersonal index                               |                           | 1.16(0.88,1.54)                   |                           | 0.291              |
| History taking                                    |                           | <b>1.81(1.25,2.60)**</b>          |                           | <b>0.002</b>       |
| Counseling performance                            |                           | <b>1.89(1.33,2.69)***</b>         |                           | <b>0.001</b>       |
| Health screening                                  |                           | <b>18.09(11.52,28.39)***</b>      |                           | <b>0.001</b>       |

Note. \* indicates < 5 % level of significance, \*\* indicates p < 1% level of significance, \*\*\* indicates p < 0.1 level of % level of significance. 1=low satisfaction; 2= moderate satisfaction; and 3= high satisfaction

## DISCUSSION

In this study, we analyzed a comprehensive range of structural and process-related factors and some individual characteristics associated with ANC's satisfaction. We used gologit2 with auto fit (Partial proportional odds model) [31] to enable statistical analysis on an ordinal scale, and was, therefore, well-positioned to robustly examine the roles of factors affecting client satisfaction.

Client satisfaction with the quality of antenatal care services, as noted by Mai Do and colleagues, has been increasingly recognized as an important outcome for the healthcare delivery system[32]. Nonetheless, our study found that only 30% of clients had high levels of satisfaction. This proportion of satisfaction was less than the findings in South Ethiopia (32%), Uganda (40%), and

1  
2  
3 Oman (59%) [23 33-35]. This lower figure is a serious concern given that low satisfaction may  
4 adversely affect women's willingness to return/continuity for other maternal services.  
5  
6

7 Furthermore, our results revealed that all the dimensions of process quality including, history  
8 taking, physical examination, counseling, and screening had positively significant impacts on  
9 client satisfaction. Similar findings were also reported by other studies, which indicated a positive  
10 association between clinical quality characteristics and client satisfaction [23 36]. A study  
11 conducted in India, for example, reaffirmed the importance of adequate clinical examinations in  
12 defining clients' expectations and helping to establish trust between the client and providers [37].  
13  
14  
15  
16  
17  
18

19 It is, however, worth noting that there was no statistically significant association between client  
20 satisfaction and all the structural aspects of care, which is consistent with results obtained in  
21 previous studies [32 38 39]. This would seem to imply that the mere existence of services is not a  
22 guarantee to bring satisfaction. Contrary to our findings, however, others [36 40] showed the  
23 positive influence of structural quality indicators on client satisfaction.  
24  
25  
26  
27

28 The available literature on the associations between maternal education and client satisfaction  
29 report inconclusive results. Chemir et al from Ethiopia reported a negative association between  
30 maternal education and service satisfaction [41]. Our study, on the contrary, observed that better-  
31 educated women were positively and significantly associated with client satisfaction. This finding  
32 is similar to that of Rahman et al. in Malaysia [33] who argued that educated women are more  
33 aware of the procedures to expect during antenatal care, which probably increases their  
34 satisfaction.  
35  
36  
37  
38  
39  
40

41 Rural-urban divides of residence had a significant impact on client satisfaction, as was a distance  
42 to the nearest health facility. We found a significant difference in levels of satisfaction among  
43 urban-rural residence, with the highest satisfaction achieved on rural than urban residents.  
44 Moreover, living more than an hour walking distance to the clinic was significantly associated  
45 with lower satisfaction. The result of this study is consistent with other studies [23 42 43].  
46  
47  
48  
49  
50

51 Women from rural areas, who also are supposed to live in far distance, are more likely to have  
52 lower expectations owing to their previous experience of healthcare and lower chance of exposure  
53 to health care information, and therefore they tend to value service they are offered [42], and more  
54 likely to report higher levels of satisfaction.  
55  
56  
57

1  
2  
3 Reproductive-related factors such as the number of antenatal visits and gestational age showed a  
4 significant association with client satisfaction. Women who made four or more antenatal visits  
5 were positively and significantly associated with the low vs moderate or high satisfactions category  
6 despite the association turned insignificant in the low or medium vs. high satisfaction category. A  
7 previous study conducted in South Ethiopia has also reported a similar finding[23]. The positive  
8 association in this regard could be due to developing awareness through repeated visiting. Besides,  
9 the repeated antenatal visits could further improve the relationship between providers and women  
10 in a positive direction[44], which in turn made them feel good towards the services.

11  
12 Another notable finding in this study was the inverse relation between gestation age and level of  
13 satisfaction. The possible reason for this negative association could be related to the fact that the  
14 late trimester is a time when more complications can occur[45]. These complications could let  
15 expectant mothers to demand extra care and support, yet they might be dissatisfied if the service  
16 was not to their expectations. Hence, providers should be alert to detect and manage the causes of  
17 dissatisfaction in pregnant women.

18  
19 Despite the important findings evolved in the present study, direct observation of the clinical  
20 consultation may bias the results obtained in a positive direction. However, the data collector spent  
21 more time at each health care facility and observed many client consultations for each provider, so  
22 that the behavior of the providers could probably become normative through time.

## 23 24 25 26 27 28 29 30 31 32 33 34 35 36 37 **CONCLUSIONS**

38 The women's satisfaction towards antenatal care in public facilities was suboptimal and was  
39 dependent on an interplay of various factors. A significant contribution to the variation in client  
40 satisfaction was attributed to factors related to the real content of care received than do structural  
41 attributes. Indeed, the results suggest that more should be done to improve the quality of antenatal  
42 care offered at public health facilities; particularly on the technical aspects of health care providers.  
43 The findings also suggest that the socio-demographic and reproductive components should not be  
44 underestimated.

45  
46  
47  
48  
49  
50  
51 **Acknowledgments:** The authors would like to acknowledge the study participants, the data  
52 collectors, and supervisors who made this research possible.

**Author Contributions:** AAE, GDA, and GTD conceived and designed this study; AAE, GDA, and GTD participated in the data analysis and the interpretation of the findings. AAE wrote the first draft of the manuscript and; AAE, GDA, and GTD made a critical review of the manuscript. All authors read, edited and approved the final manuscript.

**Funding:** This work was supported by Bahir Dar University [grant number: RCS/252/09].

**Disclaimer:** The funders had no roles in study design, fieldwork, data analysis, interpretation, and decision to publish the manuscript.

**Competing interests:** None declared.

**Patient consent for publication:** Not required.

**Ethics approval:** the study received ethical approval from the Ethical Review Board of Bahir Dar University (protocol no.: 087/18-04). A formal letter of permission was granted from the Amhara Regional Health Bureau and line offices. Verbal informed consent was obtained from all eligible participants willing to participate in the study. Also, the issue of privacy and confidentiality were strictly maintained.

**Provenance and peer review:** Not commissioned; externally peer- reviewed.

**Data sharing statement:** No additional data is available for this paper; all relevant data are included in the manuscript.

## REFERENCES

1. Kanyangarara M, Munos MK, Walker N. Quality of antenatal care service provision in health facilities across sub-Saharan Africa: Evidence from nationally representative health facility assessments. *Journal of global health* 2017;**7**(2)
2. World Health Organization. Consultation on improving measurement of the quality of maternal, newborn and child care in health facilities. 2014
3. WHO. WHO recommendations on antenatal care for a positive pregnancy experience: World Health Organization Geneva, Switzerland, 2016.
4. Raven JH, Tolhurst RJ, Tang S, Van Den Broek N. What is quality in maternal and neonatal health care? *Midwifery* 2012;**28**(5):e676-e83
5. Alkema L, Chou D, Hogan D, et al. Global, regional, and national levels and trends in maternal mortality between 1990 and 2015, with scenario-based projections to 2030: a systematic analysis by the UN Maternal Mortality Estimation Inter-Agency Group. *The Lancet* 2016;**387**(10017):462-74
6. Say L, Chou D, Gemmill A, et al. Global causes of maternal death: a WHO systematic analysis. *The Lancet Global Health* 2014;**2**(6):e323-e33
7. Osungbade KO, Ayinde OO. Maternal complication prevention: evidence from a case-control study in southwest Nigeria. *African journal of primary health care & family medicine* 2014;**6**(1):1-7

- 1
- 2
- 3
- 4 8. Kerber KJ, de Graft-Johnson JE, Bhutta ZA, Okong P, Starrs A, Lawn JE. Continuum of care for maternal,
- 5 newborn, and child health: from slogan to service delivery. *The Lancet* 2007;**370**(9595):1358-69
- 6 9. Finlayson K, Downe S. Why do women not use antenatal services in low-and middle-income
- 7 countries? A meta-synthesis of qualitative studies. *PLoS medicine* 2013;**10**(1):e1001373
- 8 10. Guideline W. Daily Iron supplementation in adult women and adolescent girls. Geneva: World Health
- 9 Organization 2016
- 10 11. Horn F, Sabova L, Pinterova E, Hornova J, Trnka J. Prevention of neural tube defects by folic acid-
- 11 awareness among women of childbearing age in Slovakia. *Bratislavske lekarske listy*
- 12 2014;**115**(2):91-97
- 13 12. World Health Organization. Service availability and readiness assessment (SARA): an annual
- 14 monitoring system for service delivery: reference manual: World Health Organization, 2013.
- 15 13. UNFPA. Trends in Maternal Health in Ethiopia. Challenges in Achieving the MDG for Maternal
- 16 Mortality; In-depth analysis of the EDHS 2000-2011, 2012.
- 17 14. Primary health care systems (PRIMASYS): case study from Ethiopia, abridged version. Geneva: World
- 18 Health Organization; 2017. Licence: CC BY-NC-SA 3.0 IGO.
- 19 15. FMOH, EPHI, WHO. Ethiopian Services Availability and Readiness Assessment(SARA) 2016 Summary
- 20 report. Addis A baba, Ethiopia January, 2017
- 21 16. EPHI, FMOH, WHO. Ethiopia Service Availability and ReadinessAssessment: 2016 Summary Report.
- 22 Addis Ababa Ethiopia. January 2016 [https://www.washinhcf.org/documents/Final-SARA-](https://www.washinhcf.org/documents/Final-SARA-Report-Jan-2017.pdf)
- 23 [Report-Jan-2017.pdf](https://www.washinhcf.org/documents/Final-SARA-Report-Jan-2017.pdf) Access date: Nov 30,2017
- 24 17. Central Statistical Agency (CSA) [Ethiopia] and ICF. 2016 Ethiopia Demographic and Health Survey
- 25 Key Findings. Addis Ababa, Ethiopia, and Rockville, Maryland, USA. CSA and ICF, 2017.
- 26 18. Braithwaite J, Hibbert P, Blakely B, et al. Health system frameworks and performance indicators in
- 27 eight countries: a comparative international analysis. *SAGE open medicine*
- 28 2017;**5**:2050312116686516
- 29 19. Donabedian A. The quality of care: how can it be assessed? *Jama* 1988;**260**(12):1743-48
- 30 20. Desalegn DM, Abay S, Taye B. The availability and functional status of focused antenatal care
- 31 laboratory services at public health facilities in Addis Ababa, Ethiopia. *BMC research notes*
- 32 2016;**9**(1):403
- 33 21. Alemu Y, Aragaw A. Early initiations of first antenatal care visit and associated factor among mothers
- 34 who gave birth in the last six months preceding birth in Bahir Dar Zuria Woreda North West
- 35 Ethiopia. *Reproductive health* 2018;**15**(1):203
- 36 22. Ewunetie AA, Munea AM, Meselu BT, Simeneh MM, Meteku BT. DELAY on first antenatal care visit
- 37 and its associated factors among pregnant women in public health facilities of Debre Markos
- 38 town, North West Ethiopia. *BMC pregnancy and childbirth* 2018;**18**(1):173
- 39 23. Lakew S, Ankala A, Jemal F. Determinants of client satisfaction to skilled antenatal care services at
- 40 Southwest of Ethiopia: a cross-sectional facility based survey. *BMC pregnancy and childbirth*
- 41 2018;**18**(1):479
- 42 24. Hanefeld J, Powell-Jackson T, Balabanova D. Understanding and measuring quality of care: dealing
- 43 with complexity. *Bulletin of the World Health Organization* 2017;**95**(5):368
- 44 25. West Gojjam ZoneHealth Office. The 2016/17 Fiscal Year Annual performance report of West
- 45 Gojjam Zone, Finote Selam ; July, 2017.
- 46 26. FMOH. Basic Emergency obstetric and Newborn Care(BEmONC) training manual.Federal Democratic
- 47 Republic of Ethiopia Ministry of Health , Addis Ababa, Ethiopia, 2013.
- 48 27. Ethiopian Standard Agency. Ethiopian standard: General Hospital requirements. First edition, ES
- 49 3614:2012, Addis Ababa Ethiopia.
- 50 28. Ethiopian Standard Agency. Ethiopian standard: Health centers requirements. First edition, ES
- 51 3611:2012, Addis Ababa Ethiopia.
- 52
- 53
- 54
- 55
- 56
- 57
- 58
- 59
- 60

- 1
- 2
- 3
- 4 29. Heredia-Pi I, Servan-Mori E, Darney BG, Reyes-Morales H, Lozano R. Measuring the adequacy of
- 5 antenatal health care: a national cross-sectional study in Mexico. *Bulletin of the World Health*
- 6 *Organization* 2016;**94**(6):452
- 7 30. Hair J. *Multivariate data analysis*: Pearson College Division. 2010
- 8 31. Williams R. Generalized ordered logit/partial proportional odds models for ordinal dependent
- 9 variables. *The Stata Journal* 2006;**6**(1):58-82
- 10 32. Do M, Wang W, Hembling J, Ametepi P. Quality of antenatal care and client satisfaction in Kenya and
- 11 Namibia. *International Journal for Quality in Health Care* 2017;**29**(2):183-93
- 12 33. Rahman MM, Ngadan DP, Arif MT. Factors affecting satisfaction on antenatal care services in
- 13 Sarawak, Malaysia: evidence from a cross sectional study. *SpringerPlus* 2016;**5**(1):725
- 14 34. Tetui M, Ekirapa EK, Bua J, Mutebi A. Quality of Antenatal care services in eastern Uganda:
- 15 implications for interventions. *Pan African Medical Journal* 2012;**13**(1)
- 16 35. Ghobashi M, Khandekar R. Satisfaction among expectant mothers with antenatal care services in the
- 17 Musandam Region of Oman. *Sultan Qaboos University Medical Journal* 2008;**8**(3):325
- 18 36. Onyeajam DJ, Xirasagar S, Khan MM, Hardin JW, Odutolu O. Antenatal care satisfaction in a
- 19 developing country: a cross-sectional study from Nigeria. *BMC public health* 2018;**18**(1):368
- 20 37. Rani M, Bonu S, Harvey S. Differentials in the quality of antenatal care in India. *International journal*
- 21 *for quality in health care* 2007;**20**(1):62-71
- 22 38. Tafese F, Woldie M, Megerssa B. Quality of family planning services in primary health centers of
- 23 Jimma Zone, Southwest Ethiopia. *Ethiopian journal of health sciences* 2013;**23**(3):245-54
- 24 39. Tancred T, Schellenberg J, Marchant T. Using mixed methods to evaluate perceived quality of care in
- 25 southern Tanzania. *International journal for quality in health care* 2016;**28**(2):233-39
- 26 40. Owili PO, Muga MA, Mendez BR, Chen B. Quality of care in six sub-Saharan Africa countries: a
- 27 provider-based study on adherence to WHO's antenatal care guideline. *International Journal for*
- 28 *Quality in Health Care* 2018;**31**(1):43-48
- 29 41. Chemir F, Alemseged F, Workneh D. Satisfaction with focused antenatal care service and associated
- 30 factors among pregnant women attending focused antenatal care at health centers in Jimma
- 31 town, Jimma zone, South West Ethiopia; a facility based cross-sectional study triangulated with
- 32 qualitative study. *BMC research notes* 2014;**7**(1):164
- 33 42. Tran TK, Gottvall K, Nguyen HD, Ascher H, Petzold M. Factors associated with antenatal care
- 34 adequacy in rural and urban contexts-results from two health and demographic surveillance
- 35 sites in Vietnam. *BMC health services research* 2012;**12**(1):40
- 36 43. Adeyinka O, Jukic AM, McGarvey ST, Muasau-Howard BT, Hawley NL. Predictors of prenatal care
- 37 satisfaction among pregnant women in American Samoa. *BMC pregnancy and childbirth*
- 38 *2017*;**17**(1):381
- 39 44. Birhanu Z, Assefa T, Woldie M, Morankar S. Determinants of satisfaction with health care provider
- 40 interactions at health centres in central Ethiopia: a cross sectional study. *BMC health services*
- 41 *research* 2010;**10**(1):78
- 42 45. Roomruangwong C, Kanchanatawan B, Sirivichayakul S, Maes M. High incidence of body image
- 43 dissatisfaction in pregnancy and the postnatal period: Associations with depression, anxiety,
- 44 body mass index and weight gain during pregnancy. *Sexual & Reproductive Healthcare*
- 45 *2017*;**13**:103-09
- 46
- 47
- 48
- 49
- 50
- 51
- 52
- 53
- 54
- 55
- 56
- 57
- 58
- 59
- 60

# BMJ Open

## Women's Satisfaction with the Quality of Antenatal Care Services Rendered at Governmental Health Facilities in Northwest Ethiopia: the application of partial proportional odds model

|                                 |                                                                                                                                                                                         |
|---------------------------------|-----------------------------------------------------------------------------------------------------------------------------------------------------------------------------------------|
| Journal:                        | <i>BMJ Open</i>                                                                                                                                                                         |
| Manuscript ID                   | bmjopen-2020-037085.R1                                                                                                                                                                  |
| Article Type:                   | Original research                                                                                                                                                                       |
| Date Submitted by the Author:   | 26-May-2020                                                                                                                                                                             |
| Complete List of Authors:       | Emiru, Amanu; Bahir Dar University, Reproductive Health and Population Studies<br>Alene, GD; Bahir Dar University, Epidemiology and Biostatistics<br>Debelew, Gurmesa; Jimma University |
| <b>Primary Subject Heading</b>: | Public health                                                                                                                                                                           |
| Secondary Subject Heading:      | Epidemiology                                                                                                                                                                            |
| Keywords:                       | Antenatal < GENETICS, Quality in health care < HEALTH SERVICES ADMINISTRATION & MANAGEMENT, Organisation of health services < HEALTH SERVICES ADMINISTRATION & MANAGEMENT               |
|                                 |                                                                                                                                                                                         |

SCHOLARONE™  
Manuscripts





I, the Submitting Author has the right to grant and does grant on behalf of all authors of the Work (as defined in the below author licence), an exclusive licence and/or a non-exclusive licence for contributions from authors who are: i) UK Crown employees; ii) where BMJ has agreed a CC-BY licence shall apply, and/or iii) in accordance with the terms applicable for US Federal Government officers or employees acting as part of their official duties; on a worldwide, perpetual, irrevocable, royalty-free basis to BMJ Publishing Group Ltd ("BMJ") its licensees and where the relevant Journal is co-owned by BMJ to the co-owners of the Journal, to publish the Work in this journal and any other BMJ products and to exploit all rights, as set out in our [licence](#).

The Submitting Author accepts and understands that any supply made under these terms is made by BMJ to the Submitting Author unless you are acting as an employee on behalf of your employer or a postgraduate student of an affiliated institution which is paying any applicable article publishing charge ("APC") for Open Access articles. Where the Submitting Author wishes to make the Work available on an Open Access basis (and intends to pay the relevant APC), the terms of reuse of such Open Access shall be governed by a Creative Commons licence – details of these licences and which [Creative Commons](#) licence will apply to this Work are set out in our licence referred to above.

Other than as permitted in any relevant BMJ Author's Self Archiving Policies, I confirm this Work has not been accepted for publication elsewhere, is not being considered for publication elsewhere and does not duplicate material already published. I confirm all authors consent to publication of this Work and authorise the granting of this licence.

1  
2  
3 1 Women's Satisfaction with the Quality of Antenatal Care Services Rendered at  
4  
5 2 Governmental Health Facilities in Northwest Ethiopia: the application of partial  
6  
7 3 proportional odds model  
8  
9

10 4 **Authors:**

11  
12 5 Amanu Aragaw Emiru<sup>1</sup>  
13 6 Getu Degu Alene<sup>2</sup>  
14 7 Gurmesa Tura Debelew<sup>3</sup>  
15  
16 8  
17 9

18  
19 10 **Author Affiliation and Addresses:**

20  
21 11 <sup>1</sup>Department of Reproductive Health and Population Studies, College of Medicine and Health  
22 12 sciences, Bahir Dar University, Bahir Dar, Ethiopia. Email: [amanuaragaw@yahoo.com](mailto:amanuaragaw@yahoo.com)

23 13 <sup>2</sup>Department of Epidemiology and Biostatistics, College of Medicine and Health sciences, Bahir  
24 14 Dar University, Bahir, Ethiopia. Email: [adgetu123@yahoo.com](mailto:adgetu123@yahoo.com)

25 15 <sup>3</sup>Department of Population and Family Health, Faculty of Public Health, Institute of Health,  
26 16 Jimma University, Jimma, Ethiopia. Email: [gurrmesatura@gmail.com](mailto:gurrmesatura@gmail.com)

27  
28 17  
29 18 **Corresponding author:**

30 19 Amanu Aragaw Emiru: postal address 79; email: [amanuaragaw@yahoo.com](mailto:amanuaragaw@yahoo.com); Telephone; +251-  
31 20 918780295  
32  
33 21  
34 22

35 23 **Keywords:** antenatal, quality, structure, process, satisfaction  
36 24  
37 25  
38 26  
39 27  
40 28  
41 29  
42 30  
43 31  
44 32  
45 33  
46 34  
47 35  
48 36  
49 37  
50 38  
51 39  
52 40  
53 41  
54 42  
55 43  
56 44  
57 45  
58 46  
59 47  
60 48

25 **Word count** (excluding title page, abstract, references, figures and tables): 3,935

## 29 ABSTRACT

30 **Objectives:** The study was aimed; 1) To describe the quality of ANC at health facilities in  
31 Northwest Ethiopia, including dimensions of structure, process, and outcome; and 2) To assess the  
32 relationship between ANC client satisfaction with structure and process quality.

33 **Design:** Cross-sectional

34 **Setting:** Healthcare facilities providing antenatal care services in Northwest Ethiopia.

35  
36 **Participants:** 795 pregnant women attending the antenatal clinics at 15 public health facilities and  
37 41 health workers working for the surveyed facilities.

38 **Outcome measures:** The outcome variable was women's satisfaction with antenatal care. The  
39 outcome was generated from multiple satisfaction items using principal component analysis on an  
40 ordered, categorical, and three-point Likert scale. The key hypothesized factors considered were  
41 structural and process aspects of care. Data were analyzed using the partial proportional odds  
42 model with 95%CI.

43 **Results:** The result revealed that only 30.3% of the pregnant women were highly satisfied while  
44 31.7% were in the low satisfaction category. The findings showed that process quality indicators  
45 better-predicted client satisfaction. In relation to this, better scores in history taking [ $OR_1=OR_2$ ;  
46 1.81 (95% CI 1.25, 2.60)], counseling [ $OR_1 = OR_2$ ; 1.89 (95% CI 1.33, 2.69)], and screening  
47 [ $OR_1= OR_2$ ; 18.10 (95% CI 11.52, 28.39)] were associated with achieving higher satisfaction. We  
48 also observed significant but lower satisfaction among women in the late trimester of pregnancy  
49 [ $OR_1 = OR_2$ ; 0.87 (95% CI 0.78, 0.97)]. However, we get hardly any significant relationship  
50 between structural attributes and client satisfaction.

51 **Conclusions:** The study demonstrated that women's satisfaction with antenatal care was low. The  
52 contents of antenatal services covered during client-provider interaction were the main factors  
53 affecting client satisfaction. This suggests that efforts are required to improve the competencies of  
54 health professionals to make them more effective while dealing with clients

55

56

## 57 **Strengths and limitations of this study**

- 58     ▪ We tried to assess the three aspects of quality: structure, process, and outcomes
- 59     ▪ The study has utilized different data collection methods including facility survey, client  
60       exit interview, provider interview, and direct observation. Hence, this could increase the  
61       validity of the result and the study.
- 62     ▪ The analysis considered the ordered nature of the outcome variable; previous studies often  
63       dichotomized satisfaction at the cost of losing information
- 64     ▪ However, the presence of an observer during the client-provider interaction may bias the  
65       results obtained in a positive direction. In addition, this study considered only the  
66       governmental facilities, and the degree of satisfaction among those who attended private  
67       facilities might be rather different to our findings.

## 68 **INTRODUCTION**

69 In the past two decades, concerted global efforts have led to increased coverage of maternal health  
70 services, even in poor resource settings[1, 2]. Yet, improvements in health outcomes did not  
71 always follow[2]. Every year, thousands of women die from pregnancy-related complications  
72 worldwide[3, 4]. The Sub-Saharan Africa countries, where Ethiopia is a part, accounted for over  
73 86% of the global maternal deaths in 2017 [5].

74 However, most maternal deaths are avoidable as health solutions to the causes of complications  
75 are well-known [3, 6]. The solution includes a strong health system that provides maternal services  
76 based on a continuum of care perspective [3]. As part of the continuum, the essence of antenatal  
77 care (ANC) is to serve as a platform for important health care activities [3, 7] including health  
78 promotion and disease prevention, screening and diagnosis of pregnancy-related complications [8,  
79 9]. As such, antenatal care creates a unique opportunity for early detection and management of  
80 hypertension, gestational diabetes, anemia, malaria, HIV, and other health conditions which  
81 otherwise would jeopardize the health of mothers and the growing fetus[10, 11].

82 Evidence has long demonstrated that in the presence of adequate healthcare services and  
83 community health workers, there is an opportunity to improve health service utilization and  
84 maternal health outcomes[2, 12] . In this regard, the government of Ethiopia has made significant

1  
2  
3 85 strides towards availing health facilities closer to the community, mainly through constructing  
4  
5 86 primary health care facilities and launching a health extension program at the community level  
6  
7 87 [13]. Establishing a voluntary based Women Health Development Army (WHDA) and eliminating  
8  
9 88 user charges for maternity services were also among the many efforts. To this effect, 16,440 health  
10  
11 89 posts, 3,547 health centers, and 311 hospitals have been constructed over the past 20 years [14].

12  
13 90 While health facility expansion is a welcome development in Ethiopia, many health facilities are  
14  
15 91 opened without the necessary materials and skilled manpower [15]. For example, while 80 percent  
16  
17 92 of the facilities were providing antenatal care, only 41 percent of them were in a position to provide  
18  
19 93 quality service [15]. As a result, the use of maternal services including antenatal care is low, and  
20  
21 94 maternal mortality stands at 412 deaths per 100,000 live births [16]. This suggests that reductions  
22  
23 95 in maternal mortality is not merely due to the availability of services but also on the content and  
24  
25 96 quality of care [1, 3, 4].

26 97 The term quality of care is used widely as a key performance indicator, but there is no universally  
27  
28 98 agreed metrics to measure quality of care for maternal and newborn health [17-19]. The term  
29  
30 99 quality is a complex concept and described from different perspectives[20]. In the Donabedian  
31  
32 100 model, quality is defined in terms of three major attributes: the structure (resources and  
33  
34 101 organizational structure in health care setting), process (how health service is delivered) and  
35  
36 102 outcome (effect of care on the status of the clients). In this model, client satisfaction was a part of  
37  
38 103 the outcome variables among others[21]. Client satisfaction can be defined as a patient's evaluation  
39  
40 104 of the services offered within the health system, relative to their expectations of care[20].

41 105 In maternity care, the client-centered approach is an important way of understanding the quality  
42  
43 106 of services received and women's interactions with health services[22]. This is especially  
44  
45 107 important in LMICs where it is recognized that women typically utilize lower quality health  
46  
47 108 services compared with women in developed countries[23]. In order to identify the action points  
48  
49 109 to improve the quality of care the World Health Organization (WHO) has developed a framework  
50  
51 110 using different elements from the provision of care as well as the experience of care, integral to  
52  
53 111 maternal and newborn care provided in the facilities[22]. However, little attempts have been made  
54  
55 112 to provide a complete picture of the quality of ANC delivered by the healthcare system in low-and  
56  
57 113 middle-income countries[24, 25].

1  
2  
3 114  
4 115 A body of literatures have examined the quality of antenatal care in Ethiopia, yet hardly was any  
5  
6 116 published data that examined all the dimensions of quality simultaneously. The available studies  
7  
8 117 focused largely on the availability of facility in puts[26] or service attendance [27-29], which  
9  
10 118 largely overlooked the information on how care was delivered and what those visits contained  
11  
12 119 [30]. Moreover, these studies did not consider the association between client satisfaction and  
13  
14 120 measures of structural and process quality. On the other hand, understanding pregnant women's  
15  
16 121 views and experiences provides an imperative for managers and policy makers to efficiently  
17  
18 122 address their needs and expectations [20].

19 123 Therefore, this study aimed to assess the quality of antenatal care at health facilities and study the  
20  
21 124 correlation between key quality measures and client satisfaction.

## 22 23 125 **METHODS**

### 24 25 126 **Study design and setting**

26  
27  
28 127 This was a cross-sectional study using a facility survey, provider interview, direct observation, and  
29  
30 128 client exit interview. The study was undertaken in five districts of West Gojjam Zone, Northwest  
31  
32 129 Ethiopia from July to August 2018. At the time of the survey, the Zone had a population of  
33  
34 130 2,611,925 people with women of reproductive age (15-49) making 23.58 % of the population. The  
35  
36 131 zone had 6 governmental hospitals, 103 health centers, and 374 health posts. In addition, it had  
37  
38 132 114 private clinics and 1 hospital. All maternal health services including antenatal care were  
39  
40 133 provided free of charge in public health facilities [31].

### 41 134 **Study population and sampling**

42  
43  
44 135 The population consisted of public health facilities that provided ANC, pregnant women attending  
45  
46 136 ANC clinic, maternal health care providers, and health authorities working for the surveyed health  
47  
48 137 facilities.

49  
50 138 This study was part of a large project on the continuum of maternal health care that linked health  
51  
52 139 facility data with a household survey. A number of sampling methods can be used to link  
53  
54 140 characteristics of the sampled facilities to those of the serviced population, yet linking the sample  
55  
56 141 areas(clusters) is the best approach[32] and have been considered in this study. Full details of the

1  
2  
3 142 sampling procedure for the project have been reported elsewhere[33, 34]. In brief, data from  
4  
5 143 household surveys on access to maternity services were linked to health facility data in the same  
6  
7 144 district. The two studies were timed in such a way that one could inform the next.

8  
9 145 As a first step, a community-based study was done by using a multistage sampling procedure. For  
10  
11 146 this, the study area was first stratified in to 13 rural districts and 2 town administrations. Then,  
12  
13 147 five districts of the zone (4 rural districts and 1 town administration) were selected by simple  
14  
15 148 random sampling. Next, 15 kebeles (3 kebeles from each district) were selected with simple  
16  
17 149 random sampling technique. Kebele is the smallest administrative unit in Ethiopian context.  
18  
19 150 Hence, in this study the population-based study was the basis to identify the facilities to be  
20  
21 151 surveyed.

22 152 Secondly, the nearby public facilities at which the women sought care were identified during a  
23  
24 153 house-to-house survey. Once the health care facilities were identified by type and location where  
25  
26 154 they found facility survey was done across all the selected facilities. Eligibility of facilities was  
27  
28 155 determined by two characteristics: 1) the facility that was not under construction, and ) the facility  
29  
30 156 reported basic maternity and reproductive health services( including ANC, facility delivery,  
31  
32 157 postnatal care and family planning) during the last 12 months preceding the survey. The health  
33  
34 158 facility survey was conducted in all the 15 public health facilities: five district hospitals and ten  
35  
36 159 health centers.

37 160 All the health care providers that were engaged in the provision of ANC in the selected facilities  
38  
39 161 during the data collection period were included in the study. This approach is in accordance with  
40  
41 162 recommendations by Anthony G. Turner and colleagues [32].

42 163 For the satisfaction survey and clinical observation, a sample size of 824 was calculated using the  
43  
44 164 formula for single population proportion based on the assumptions: 95% confidence level; 5%  
45  
46 165 margin of error, 42% service availability and readiness of public facilities in Ethiopia [15], design  
47  
48 166 effect of 2, and a 10% non-response rate. Then, the calculated sample size was allocated to each  
49  
50 167 health care facility based on the average daily load of ANC attendees for 2016/17 fiscal year. From  
51  
52 168 the sampled facilities, 795 women were selected using a systematic sampling procedure with  
53  
54 169 probability to proportional size method.

## 55 170 **Data collection**

1  
2  
3 171 In this study, an attempt was made to measure all dimensions of the quality of ANC services:  
4  
5 172 structure, process, and outcome. For each dimension of quality, a set of questions were adapted  
6  
7 173 from the WHO guidelines [3, 12], the Ethiopian demographic and health survey[16], and the list  
8  
9 174 of interventions recommended by the federal ministry of health of Ethiopia [35].

10  
11 175 The survey comprised four main data collection methods: 1) Health facility surveys; 2) provider  
12  
13 176 interview;3) direct observation of ANC consultations; and 4) exit interview with pregnant women.  
14  
15 177 While structured and pre-tested questionnaires were used as a tool for provider and exit client  
16  
17 178 interviews, checklists were used in the facility survey and observation study.

18  
19 179 Experienced midwives who were not affiliated with the surveyed healthcare facilities collected the  
20  
21 180 data. In each health facility, a team consisting of two data collectors was assigned. While one of  
22  
23 181 the team members was responsible to carry out the observational study and the healthcare provider  
24  
25 182 interview, the other was responsible for managing the exit interview and the facility survey.

26  
27 183 A facility survey of all the selected facilities was carried out to assess the availability of essential  
28  
29 184 materials and staffing. For staffing the assessment checklist was based on the national  
30  
31 185 standards for each health facility type. A non-participatory observation was also undertaken  
32  
33 186 among 41 maternal health workers who were working at the ANC clinic during the time of the  
34  
35 187 survey. This was aimed to evaluate whether health care workers conformed in conducting key  
36  
37 188 ANC tests or examinations. When possible, the health workers who were observed were also  
38  
39 189 interviewed, but when this was not possible, other providers of antenatal care service were  
40  
41 190 substituted. Following her consultation, each pregnant woman was interviewed at the exit to assess  
42  
43 191 the level of satisfaction on the service she received.

## 43 192 **Variables and Measurement**

44  
45 193 Structural quality was calculated at the facility level, while indices for process attributes and client  
46  
47 194 satisfaction were made at individual women level.

48  
49 195 **Outcome variable:** the outcome variables was ANC client satisfaction, and computed by  
50  
51 196 aggregating women's responses to a series questions regarding the ANC visit using a principal  
52  
53 197 components analysis.



1  
2  
3 198 During the analysis, important assumptions including Bartlett's Test of Sphericity, Kaiser-Meyer-  
4  
5 199 Olkin (KMO) measure of sampling adequacy, and communalities scores were checked. The  
6  
7 200 Eigenvalue >1 was used to decide the number of latent variables that we did for extracting factors.  
8  
9 201 Initially, 24 variables were considered for the analysis but eventually 12 variables were dropped  
10  
11 202 as they failed to meet the assumptions of PCA. An index was computed from original variables  
12  
13 203 retained in the process. Thus, we computed a summed index from the retained items of the  
14  
15 204 components that explained 68% of the total variances.

16 205 Finally, the overall satisfaction index was developed by categorizing the sum of scores into a three  
17  
18 206 point Likert scale: 0-50% as 'low satisfaction' (coded 1), 51-79 % (coded 2) as having 'moderate  
19  
20 207 satisfaction', and 80-100 % (coded 3) as 'high satisfaction'

## 21 208 **Main explanatory variables**

### 22 209 **Structural attributes:**

23  
24 210 Facility inventory checklist with 47 items was used to assess structural attributes of the health  
25  
26 211 facilities. Each item was granted '1' if the item was available and functional and a score of '0' if  
27  
28 212 this was not the case. The items in each construct were then added together, with equal weights,  
29  
30 213 to generate the following five indices: 1) an infrastructure index (7 items); 2) Health Staff index  
31  
32 214 (8 variables); 3) an equipment index (10 items); 4) Index for drugs and vaccines (14 items); and  
33  
34 215 5) index for lab capacity and supplies (8 items). Finally, we categorized each index into three  
35  
36 216 categories: poor structure quality, fair and good structure quality. Furthermore, the overall  
37  
38 217 summary score was constructed by aggregating the mean scores of all the five dimension of care  
39  
40 218 and was set as the structure index.

### 41 219 **Process attributes**

42  
43 220 The process attributes comprised interpersonal and technical aspects of the provider-client  
44  
45 221 interaction. Interpersonal aspects included issues such as greeting, maintenance of privacy and  
46  
47 222 handling of client concerns. Technical aspects included observation of specific services performed,  
48  
49 223 such as history-taking, ANC physical examinations, counseling related to pregnancy, and  
50  
51 224 laboratory examinations.

52  
53 225 A scoring system was established to calculate five dimensions of process attributes from 46 items:  
54  
55 226 (a) interpersonal communication(6 activities), (b) history taking(12 activities); (c) clinical  
56  
57 227 examination(9 activities); (d) counseling(10 activities); and (f) health screening and preventive  
58  
59 228 measures(9 services). This scoring system categorizes whether an accepted standard of quality has  
60  
229 been met or not.

230 All the procedures/activities provided were weighted equally, and was granted 1 if the activity  
231 was observed and performed according to accepted standards of care, and a score of '0' if this was  
232 not the case. The scores of the key items for each individual client-provider interaction being  
233 observed were added up and averaged to determine a score for each dimension of care.  
234 Furthermore, the overall summary score was constructed by aggregating the mean scores of all the  
235 dimension of care and was set as the process index. The total scores ranged between 0- 46.  
236 Accordingly, the process of quality care was scored as follows: Low quality <23, Moderate quality  
237 23- <37 and High quality  $\geq 37$ .

### 238 **Other explanatory variables**

239 Other variables included were: i) Facility type; (ii); demographics (iii) socio-economic; and (iv)  
240 reproductive characteristics of the women

241 The Cronbach's alpha was used to measure the internal consistency of a set of items for the three  
242 quality dimensions, and a reliability coefficient of 0.70 or higher was considered acceptable[36].

### 243 **Data analysis**

244 Data collected were entered using the Epiinfo software (7.0 version) and analyzed using STATA  
245 14.0. Owing to the ordinal nature of the outcome variable(low, medium, and high satisfaction ), a  
246 typical approach was to use the standard ordered logit [37]. Yet, the Brant test revealed that the  
247 proportional odds assumptions were violated for some independent variables ( $\chi^2=63.4$  df (16);  $p<$   
248 0.001). We, therefore, used a generalized ordered logistic regression with autofit, (also called  
249 partial proportional odds model) for assessing the association between satisfaction and explanatory  
250 variables.

251 The partial proportional odds model is a hybrid of ordinal regression (same coefficients across the  
252 categories) and the default gologit (different coefficients across categories). Hence, if the Brant  
253 test was not met, the analysis gave two odds ratios for an explanatory variable [Low vs.  
254 medium/high Satisfaction (OR1) and low/medium vs. high satisfaction (OR2)]. Whereas for  
255 variables that did not violate the proportional odds assumption a single odds ratio,  $OR1 = OR2$   
256 ( $OR1 = 2$ ) reported [37].

257 The bivariable gologit model was used for variable inclusion to the final multivariable model.  
258 Accordingly, the independent variables to be included in the multivariable model were selected  
259 when the p value was  $<0.2$  in the bivariable model. Before running the multivariable analysis

260 multi-collinearity test between independent variables was done using the Variance Inflation Factor  
 261 (VIF), and variables were not strongly correlated (the highest value was 2.7).

262 The final multivariable model was applied to define adjusted odds ratios (ORs), measuring the  
 263 effect of different determinants on being assigned to a higher satisfaction category. Statistical  
 264 significance for the final model was set at  $P < 0.05$ .

### 265 **Patient and public involvement**

266 Patients/public were not involved in setting the research question or the outcome measures, and in  
 267 the design and implementation of the study. Participation was voluntary based and no incentives  
 268 were provided. The findings of this study will be disseminated to policy-makers and local-level  
 269 service implementers.

## 270 **RESULTS**

### 271 **General characteristics of women**

272 Out of 824 eligible clients, 795 enrolled in the study yielding a response rate of 96.5%. The highest  
 273 percentage of women were rural residents 575 (72.3%), and belonging to the age range of 20-29  
 274 years 433(54.5%). Regarding their age, the mean and standard deviation were 27.8 and 5.9 years,  
 275 respectively. Of the total respondents, 63.4% did not attend formal education.

276 About one-third of the participants, 274(34.5) were first-time visitors for ANC, and more than half  
 277 of the women interviewed had their first ANC visit during their second trimester of pregnancy  
 278 (Table 1).

279 Table1: Background characteristics of ANC clients interviewed in public health facilities of West Gojjam  
 280 Zone, Northwest Ethiopia (N=795)

281

| Description         | Number | Percent |
|---------------------|--------|---------|
| Address             |        |         |
| Urban               | 220    | 27.7    |
| Rural               | 575    | 72.3    |
| Age (Years)         |        |         |
| 15-19               | 91     | 11.4    |
| 20-29               | 433    | 54.5    |
| 30-39               | 236    | 29.7    |
| 40+                 | 35     | 4.4     |
| Education           |        |         |
| No formal Education | 504    | 63.4    |

|                                   |     |      |
|-----------------------------------|-----|------|
| Primary Education (Grade 1-8)     | 212 | 26.7 |
| Secondary education and above     | 79  | 9.9  |
| Occupation                        |     |      |
| Farmer                            | 575 | 72.3 |
| Employee                          | 35  | 4.4  |
| Merchant                          | 53  | 6.7  |
| Daily laborer                     | 18  | 2.3  |
| Others(*including Housewives)     | 114 | 14.3 |
| Parity                            |     |      |
| Nulliparous                       | 182 | 22.9 |
| Primipara 1                       | 190 | 23.9 |
| Para 2-4                          | 321 | 40.4 |
| Para 5+                           | 102 | 12.8 |
| Gestational Age at time of survey |     |      |
| 0-3 months                        | 79  | 9.9  |
| 4-7 months                        | 562 | 70.7 |
| >=8 months                        | 154 | 19.4 |
| Number of ANC visits              |     |      |
| 1                                 | 274 | 34.5 |
| 2-3                               | 436 | 54.8 |
| 4+                                | 85  | 10.7 |
| Timing of first ANC visit         |     |      |
| First trimester                   | 332 | 41.8 |
| Second Trimester                  | 419 | 52.7 |
| Third Trimester                   | 44  | 5.5  |
| Distance to HCF                   |     |      |
| Less than 1 hour                  | 532 | 66.9 |
| Greater or equal to 1 hour        | 263 | 33.1 |

282  
283  
284  
285  
286  
287  
288  
289  
290  
291  
292  
293  
294  
295

### Health workers background characteristics

As can be seen in Table 2, forty-one health workers who worked for 15 public health facilities were included in the study. The largest number of health workers observed in any one-health facility was four and the smallest was one. Most of the health providers were men (61%). The median age of these health professionals was 29.0 years (Range: 23 to 36 years of age) and the median number of years of professional experience was 3.0 years (Range: 1 to 12 years). This is an indication that most of the providers had worked in their organization long enough to understand and give credible information to pregnant women (Table 2).

Table 2: Background characteristics of maternal health workers in public health facilities of West Gojjam Zone, Northwest Ethiopia (N=41)

| Characteristics | Number | Percent |
|-----------------|--------|---------|
|-----------------|--------|---------|

|                                                              |                   |      |
|--------------------------------------------------------------|-------------------|------|
| Sex of the provider                                          |                   |      |
| Male                                                         | 25                | 61   |
| Female                                                       | 16                | 39   |
| Median Age (Range)                                           | 29.0(23-36 years) |      |
| Median Experience (Range)                                    | 3.0(1-12 years)   |      |
| Training received on;                                        |                   |      |
| ANC screening                                                | 22                | 53.7 |
| Counseling                                                   | 21                | 51.2 |
| BEmONC                                                       | 27                | 65.9 |
| Hypertension management                                      | 20                | 48.8 |
| HIV/PMTCT                                                    | 32                | 78.0 |
| CRC                                                          | 18                | 43.9 |
| Personally supervised by the supervisor in the last 3 Months |                   |      |
| Yes                                                          | 15                | 36.6 |
| No                                                           | 26                | 63.4 |

296

297

### Structural quality attributes

298 The analysis presented in table 3 characterizes the structural and process dimensions of ANC  
 299 quality, respectively. Despite there exists heterogeneity in the availability of different components,  
 300 the summary scores of the facility surveys were reasonably good (70 %). Laboratory consumables  
 301 were more likely to be available (80%) compared to other structural components. Nonetheless, the  
 302 availability of infrastructure and general amenities was particularly deficient (59%). Some  
 303 essential antenatal drugs such as magnesium sulfate, injectable antibiotics, and antihypertensive  
 304 drugs were also no longer available during the time of the survey (64%) (Table3).

305 Table3: Results of structural and process quality components of antenatal care in selected public  
 306 health facilities of Northwest Ethiopia.

307

| ANC Quality Dimension                                     | Subgroups                                       | Mean Quality score |
|-----------------------------------------------------------|-------------------------------------------------|--------------------|
| <b>Structural Attributes<br/>(Health facility survey)</b> | Minimum: 0.00-Max: 1.00                         |                    |
|                                                           | Number of health facilities                     | 15                 |
|                                                           | Availability of infrastructure                  | 0.59               |
|                                                           | Availability of essential equipment             | 0.77               |
|                                                           | Availability of staff, guidelines, and job-aids | 0.71               |
|                                                           | Availability of Drugs and vaccines              | 0.64               |
|                                                           | Availability of diagnostic tests/Lab supplies   | 0.80               |
|                                                           | <b>Total structural Score</b>                   | <b>0.70</b>        |
| <b>Process Attributes</b>                                 | Minimum: 0.00-Max: 1.00                         |                    |
|                                                           | Number of pregnant women                        | 795                |
|                                                           | Interpersonal performance                       | 0.60               |
|                                                           | Technical skills                                | 0.69               |

|                                |                                                 |             |
|--------------------------------|-------------------------------------------------|-------------|
| <b>(Observational studies)</b> | - History taking                                | 0.73        |
|                                | - Clinical examination                          | 0.70        |
|                                | - Counseling                                    | 0.69        |
|                                | - Laboratory examinations & preventive measures | 0.63        |
|                                | <b>Total process Score</b>                      | <b>0.65</b> |

308  
309 The availability of basic antenatal care items on the day of the survey varied widely by type of  
310 facility, with hospitals generally better in the number of items to provide comprehensive antenatal  
311 care. Some items were universally available across facility types, such as suction apparatus  
312 (81.5%) and gloves (94.1 %). However, items such as manual vacuum extractor and calcium  
313 gluconate in the health centers and insecticide-treated bed nets (ITNs) in hospitals were extremely  
314 deficient (Supplementary file 1). The Cronbach's alpha value of all the items measuring structural  
315 attributes of ANC quality was 0.74.

### 316 **Process quality attributes:**

#### 317 **Interpersonal performance**

318 Generally, interpersonal aspects of quality were extremely low (average score of 60%), especially  
319 concerning warm greeting and welcoming the client (49.9%) and self-introduction of the provider  
320 (38.9%). However, this aspect was better in maintaining the privacy of women during the time of  
321 consultation (i.e. both visual and auditory), which was observed in 80% of the consultations.

#### 322 **Technical performances**

323 The number of essential ANC services received by the surveyed women, on average, was  
324 inadequate (60%). Looking in detail at the results of different dimensions, we found that some  
325 technical performance aspects scored poorly, especially health screening (63%) and counseling  
326 (69%). At 73%, however, the general history of the pregnant women was rather better (Table 3).

327 There were variations in the frequency of carrying out clinical examination and laboratory tests.  
328 While some examinations were done regularly (e.g., weighing, blood pressure, and abdominal  
329 palpation), others were done less often. For example, only 64% of the women were checked for  
330 anemia. Regrettably, only 2.3% of them received all essential laboratory tests and preventive  
331 medicines recommended by the Federal Ministry of Health of Ethiopia. Among all the tests and  
332 interventions, screening for asymptomatic bacteriuria (31.5%) and intervention for deworming

333 (17.7%) were the lowest, compared to the HIV test (93%) (Supplementary file 2). The Cronbach's  
 334 alpha value of all the items measuring process attributes of ANC quality was 0.74.

### 335 **Client Satisfaction**

336 The findings on the respondent level of agreement (expressed on a scale ranging from 1 to +5) on  
 337 various aspects of antenatal care service satisfaction showed that women were satisfied very much  
 338 on the advice they received about vaginal bleeding than others(mean score=3.71). Although the  
 339 difference was marginal, respondents were highly dissatisfied with the information received about  
 340 breastfeeding as shown by a mean of 2.54.

341 Overall scores among the respondents revealed that 241(30.3%) of the clients were highly  
 342 satisfied, 302(38.0%) were moderately satisfied, and almost one-thirds, 252(31.7) percentage were  
 343 unsatisfied. The mean satisfaction score was 3.11, which is approximately equivalent to neutral on  
 344 the five-point Likert scale (Table 4). The items were checked for reliability using Cronbach's  
 345 alpha internal consistency coefficient and the overall alpha value was 0.81

346 Table 4: level of satisfaction of pregnant women visiting public health care facilities in Northwest  
 347 Ethiopia.

| Satisfaction                                                                          | Very satisfied (%) | Satisfied (%) | Indifferent (%) | Dissatisfied (%) | Very dissatisfied (%) | Mean | SD    |
|---------------------------------------------------------------------------------------|--------------------|---------------|-----------------|------------------|-----------------------|------|-------|
| <b>To what extent you agree with the following statements:</b>                        |                    |               |                 |                  |                       |      |       |
| The health workers in this facility are very friendly and approachable                | 6.8                | 57.2          | 34.0            | 2.0              | 0                     | 3.69 | 0.626 |
| The health staff are courteous and respectful                                         | 4.5                | 40.8          | 42.4            | 11.5             | 0.9                   | 3.37 | 0.778 |
| The treatment and/or advice I received from the health worker is optimal              | 3.5                | 28.4          | 49.2            | 11.6             | 5.3                   | 3.12 | 0.874 |
| The provider gives me opportunities to express the concerns I have                    | 2.0                | 24.4          | 54.0            | 17.0             | 2.6                   | 3.06 | 0.773 |
| The provider gave me chances to ask him/her questions                                 | 1.6                | 21.4          | 48.6            | 23.3             | 5.2                   | 2.91 | 0.843 |
| I am well informed on the birth preparedness                                          | 0.5                | 17.6          | 59.5            | 21.1             | 1.3                   | 2.95 | 0.675 |
| I am informed about breastfeeding after birth                                         | -                  | 2.1           | 56.1            | 35.0             | 6.8                   | 2.54 | 0.654 |
| I am told about how to recognize and proceed in case of vaginal bleeding              | 5.2                | 62.9          | 30.0            | 1.9              | 0.1                   | 3.71 | 0.595 |
| I am told about how to recognize and proceed in case of fever                         | 0.6                | 28.7          | 45.0            | 18.4             | 7.3                   | 2.97 | 0.887 |
| I'm told about how to recognize and proceed in case of premature uterine contractions | 1.0                | 12.7          | 62.1            | 18.9             | 5.3                   | 2.85 | 0.739 |
| I am told about how to recognize and proceed in case of severe headache               | 0.2                | 24.2          | 66.4            | 9.2              | --                    | 3.15 | 0.566 |

|                                                                                |             |      |      |      |     |      |       |
|--------------------------------------------------------------------------------|-------------|------|------|------|-----|------|-------|
| I'm told about how to recognize and proceed in case of difficulty in breathing | 0.6         | 12.8 | 69.4 | 15.0 | 2.1 | 2.95 | 0.622 |
| Average satisfaction                                                           |             |      |      |      |     | 3.11 | 0.72  |
| <b>Overall satisfaction</b>                                                    |             |      |      |      |     |      |       |
| <b>High satisfaction</b>                                                       | 241 (30.3%) |      |      |      |     |      |       |
| <b>Moderate satisfaction</b>                                                   | 302 (38.0%) |      |      |      |     |      |       |
| <b>Low satisfaction</b>                                                        | 252 (31.7%) |      |      |      |     |      |       |

349

### 350 **Factors associated with client satisfaction**

351 As stated earlier in the methods section we applied the multivariable partial proportional odds  
 352 regression model to examine the determinants of the overall satisfaction of pregnant women on  
 353 the antenatal healthcare service received. During the analysis, the three-scale dependent variable  
 354 produced two panels: panel-one (i.e., low vs. moderate/ high satisfaction); and panel two (low  
 355 /moderate vs. high satisfaction). In each group, the lower values were recoded to “0”, while the  
 356 highest values were recorded to “1”. A positive coefficient (equivalent to  $OR > 1$ ) implied that  
 357 increases in the explanatory variable led to higher levels of client satisfaction, while negative  
 358 coefficient ( $OR < 1$ ) mean that increase in the explanatory value led to less satisfaction [37].

359 The Brant test of parallel lines assumption ( $\chi^2=63.4$  df (16);  $p < 0.001$ ) revealed that women’s  
 360 education, number of ANC visits, distance to health facility, and index for clinical examination  
 361 were the variables that failed to meet assumption. For these variables, the coefficient estimates and  
 362 odds ratios were intended to differ in the two panels (categories) (Supplementary file 3).

363 After adjusting for all the covariates, significant differences in the ANC service satisfaction was  
 364 observed by process quality indicators and socio-demographic factors. Residence, distance to  
 365 clinic, women’s, education, number of ANC visits, and gestational age appeared to be important  
 366 predictors of satisfaction with antenatal care. Moreover, process quality indicators such as history  
 367 taking, clinical examination, counseling, and health screening also remained significant in the final  
 368 model ( $p < 0.05$ ).

369 As women’s educational status, number of ANC visits, distance to the healthcare facility, and  
 370 clinical examination violated the proportional odds assumption (the Brant test),  $aOR_1 \neq aOR_2$  and  
 371 separate interpretations at each category were therefore required for these variables. Hence,  $aOR_1$   
 372 stands for panel one (low vs. moderate or high) while  $aOR_2$  was for the second panel (low/  
 373 moderate vs. high satisfaction



374 In this regard, women with better schooling [aOR<sub>1</sub>=3.11(95% CI 2.02, 4.81)], and those with  
 375 increased number of ANC visits [aOR<sub>1</sub> = 4.16 (95% CI 1.66, 10.23)] were significantly associated  
 376 with increased odds of having moderate or high satisfaction, but no significant difference for  
 377 low/moderate vs. high scores. However, the findings revealed that living within 60 minutes  
 378 walking distance significantly reduced the odds of being satisfied [low vs. moderate/high scores,  
 379 aOR<sub>1</sub> = 0.29 (95% CI 0.18, 0.46)] though it failed to achieve statistical significance in the second  
 380 category[ low/moderate vs. high scores].

381  
 382 Being better in clinical examination of the process dimension was positively and significantly  
 383 associated with the two satisfaction categories [Low vs. moderate/high: aOR<sub>1</sub> = 1.69 (95% CI 1.13,  
 384 2.54)], and [low/moderate vs.high:aOR<sub>2</sub>=4.09(95%CI2.69, 6.24)]. As can be seen in the table 5,  
 385 the effects became much stronger when satisfaction level moved from low to high category.

386 However, variables that did not violate the assumption had a single beta coefficient at each of the  
 387 two satisfaction categories; and hence a single aOR<sub>1</sub> =2 was reported. Client satisfaction was  
 388 associated with better process scores. Better scores in history taking [aOR<sub>1</sub> = aOR<sub>2</sub>; 1.81 (95% CI  
 389 1.25, 2.60)], counseling performance [aOR<sub>1</sub> = aOR<sub>2</sub>; 1.89 (95% CI 1.33, 2.69)], and health  
 390 screening and preventive measures [aOR<sub>1</sub> = 2; 18.10 (95% CI 11.52, 28.39)] were associated with  
 391 achieving higher ANC satisfaction scores.

392 Similarly, being a rural resident was significantly associated with achieving a higher satisfaction  
 393 score [aOR<sub>1</sub>= aOR<sub>2</sub>; 1.89 (95% CI 1.05, 3.41)]. For every one month increase in gestational age  
 394 of pregnancy, however, the odds of being above a particular satisfaction category was decreased  
 395 by a factor of 0.87[OR<sub>1</sub> = OR<sub>2</sub>; 0.87 (95% CI 0.78, 0.97)] (Table 5).

396 Table 5: multivariable partial proportional odds model showing factors affecting ANC satisfaction in  
 397 West Gojjam Zone, Northwest Ethiopia (n=795)  
 398

| Explanatory Variables                                                         | Outcome variables (panels) |                                                             |                          |                    |
|-------------------------------------------------------------------------------|----------------------------|-------------------------------------------------------------|--------------------------|--------------------|
|                                                                               | Panel One (1 Vs. 2 and 3)  |                                                             | Panel Two (1or 2 Vs 3)   |                    |
|                                                                               | aOR 1 (95%CI)              | Coefficients not varying(OR <sub>1</sub> =OR <sub>2</sub> ) | aOR <sub>2</sub> (95%CI) | Overall P-value(s) |
| Education of women (Attended at least primary education vs.no schooling[Ref]) | <b>3.11(2.02,4.81)***</b>  |                                                             | 1.34(0.97,1.86)          | <b>0.001/0.073</b> |
| Number of ANC visits (>=4, <4 visits[Ref])                                    | <b>4.16(1.66,10.23)**</b>  |                                                             | 0.99(0.51,1.95)          | <b>0.002/0.996</b> |

|                                                                      |                           |                              |                               |                    |
|----------------------------------------------------------------------|---------------------------|------------------------------|-------------------------------|--------------------|
| Walking distance to HCF (< 1 hour, >=1 hr. [Ref])                    | <b>0.29(0.18,0.46)***</b> |                              | 0.64(0.39,1.04)               | <b>0.001/0.072</b> |
| Clinical examination (At least fair, Poor[Ref])                      | <b>1.69(1.13,2.54)*</b>   |                              | <b>4.09(2.69,6.24)*</b><br>** | <b>0.011/0.001</b> |
| Address (Rural, Urban[Ref])                                          |                           | <b>1.89(1.05,3.41)*</b>      |                               | <b>0.035</b>       |
| Age in years (20+, 15-19[Ref])                                       |                           | 1.10(0.80,1.50)              |                               | 0.561              |
| Para(Para1+, Nulliparous[Ref])                                       |                           | 0.80(0.63,1.01)              |                               | 0.065              |
| Gestational age in months(Cont.)                                     |                           | <b>0.87(0.78,0.97)**</b>     |                               | <b>0.01</b>        |
| Service year of provider (year)(Cont.)                               |                           | 0.99(0.93,1.07)              |                               | 0.95               |
| Supervision received in the last 3 months (Yes, no[Ref])             |                           | 1.34(0.80,2.26)              |                               | 0.264              |
| Infrastructure (At least fair, Poor[Ref])                            |                           | 0.78(0.56,1.08)              |                               | 0.138              |
| Drug availability (At least fair, Poor[Ref])                         |                           | 0.95(0.70,1.28)              |                               | 0.728              |
| Interpersonal index (At least fair, Poor[Ref])                       |                           | 1.16(0.88,1.54)              |                               | 0.291              |
| History taking (At least fair, Poor[Ref])                            |                           | <b>1.81(1.25,2.60)**</b>     |                               | <b>0.002</b>       |
| Counseling performance (At least fair, Poor[Ref])                    |                           | <b>1.89(1.33,2.69)***</b>    |                               | <b>0.001</b>       |
| Laboratory tests and preventive meeasures (At least fair, Poor[Ref]) |                           | <b>18.09(11.52,28.39)***</b> |                               | <b>0.001</b>       |

399

400 Note. \* indicates < 5 % level of significance, \*\* indicates p < 1% level of significance, \*\*\* indicates p <  
 401 0.1 level of % level of significance. 1=low satisfaction; 2= moderate satisfaction; and 3= high  
 402 satisfaction

## 403 DISCUSSION

404 In this study, we analyzed a comprehensive range of structural and process-related factors and  
 405 some individual characteristics associated with ANC's satisfaction. Structural and process  
 406 attributes were the key independent variables of interest in the regression estimation.  
 407 Demographics and Socio-economic characteristics were also the other sets of explanatory  
 408 variables included in this study.

409 Client satisfaction with the quality of antenatal care services, as noted by Mai Do and colleagues,  
 410 has been increasingly recognized as an important outcome for the healthcare delivery system[38].  
 411 Nonetheless, our study found that only 30% of clients had high levels of satisfaction. This  
 412 proportion of satisfaction was less than the findings in South Ethiopia (32%), Uganda (40%), and

1  
2  
3 413 Oman (59%) [29, 39-41]. This lower figure is a serious concern given that low satisfaction may  
4 414 adversely affect women's willingness to return/continuity for other maternal services.

6  
7 415 Furthermore, our results revealed that all the dimensions of process quality including, history  
8 416 taking, physical examination, counseling, and screening had positively significant impacts on  
9 417 client satisfaction. Similar findings were also reported by other studies, which indicated a positive  
10 418 association between clinical quality characteristics and client satisfaction [29, 42]. A study  
11 419 conducted in India, for example, reaffirmed the importance of adequate clinical examinations in  
12 420 defining clients' expectations and helping to establish trust between the client and providers [43].

13  
14  
15  
16  
17  
18  
19 421 It is, however, worth noting that there was no statistically significant association between client  
20 422 satisfaction and all the structural aspects of care, which is consistent with results obtained in  
21 423 previous studies [38, 44, 45]. This would seem to imply that the mere existence of services is not  
22 424 a guarantee to bring satisfaction. Contrary to our findings, however, others [42, 46] showed the  
23 425 positive influence of structural quality indicators on client satisfaction.

24  
25  
26  
27  
28 426 The available literature on the associations between maternal education and client satisfaction  
29 427 report inconclusive results. Chemir et al from Ethiopia reported a negative association between  
30 428 maternal education and service satisfaction [47]. Our study, on the contrary, observed that better-  
31 429 educated women were positively and significantly associated with client satisfaction. This finding  
32 430 is similar to that of Rahman et al. in Malaysia [39] who argued that educated women are more  
33 431 aware of the procedures to expect during antenatal care, which probably increases their  
34 432 satisfaction.

35  
36  
37  
38  
39  
40  
41 433 Rural-urban divides of residence had a significant impact on client satisfaction, as was a distance  
42 434 to the nearest health facility. We found a significant difference in levels of satisfaction among  
43 435 urban-rural residence, with the highest satisfaction achieved on rural than urban residents.  
44 436 Moreover, living within an hour walking distance to the clinic was significantly associated with  
45 437 lower satisfaction. The result of this study is consistent with other studies [29, 48, 49]. Women  
46 438 from rural areas, who also are supposed to live in far distance, are more likely to have lower  
47 439 expectations owing to their previous experience of healthcare and lower chance of exposure to  
48 440 health care information, and therefore they tend to value service they are offered [48], and more  
49 441 likely to report higher levels of satisfaction.

1  
2  
3 442 Reproductive-related factors such as the number of antenatal visits and gestational age showed a  
4  
5 443 significant association with client satisfaction. Women who made four or more antenatal visits  
6  
7 444 were positively and significantly associated with the low vs moderate or high satisfactions category  
8  
9 445 despite the association turned insignificant in the low or medium vs. high satisfaction category. A  
10  
11 446 previous study conducted in South Ethiopia has also reported a similar finding[29]. The positive  
12  
13 447 association in this regard could be due to developing awareness through repeated visiting. Besides,  
14  
15 448 the repeated antenatal visits could further improve the relationship between providers and women  
16  
17 449 in a positive direction[50], which in turn made them feel good towards the services.

18 450 Another notable finding in this study was the inverse relation between gestation age and level of  
19  
20 451 satisfaction. The possible reason for this negative association could be related to the fact that the  
21  
22 452 late trimester is a time when more complications can occur[51]. These complications could let  
23  
24 453 expectant mothers to demand extra care and support, yet they might be dissatisfied if the service  
25  
26 454 was not to their expectations. Hence, providers should be alert to detect and manage the causes of  
27  
28 455 dissatisfaction in pregnant women.

29 456 Despite the important findings evolved in the present study, some caution needs to be taken in  
30  
31 457 interpreting the results as our study had the following limitations. First, our study assessed the  
32  
33 458 satisfaction level of pregnant women who attended public facilities only; yet, the degree of  
34  
35 459 satisfaction for women who attended private facilities might be rather different to our findings.

36  
37 460 Second, the presence of an observer during the client-provider interaction could generate bias  
38  
39 461 through the Hawthorne effect. Nonetheless, the data collector spent more time at each health care  
40  
41 462 facility and observed many client consultations for each provider. In relation to this, Leonard et al.  
42  
43 463 reported that the quality of health workers performance increased by 20% on average when being  
44  
45 464 observed but that was only temporary and 10-15 observations later the behavior of the providers  
46  
47 465 became normative[52].

48  
49 466 Third, social desirability bias might also be a concern in cases that women in exit interviews feel  
50  
51 467 they need to respond in a way expected of them. Yet, satisfaction was measured using a summary  
52  
53 468 of client's responses to a series of questions, which is less subjective than asking a single question.  
54  
55 469 In addition, the use of interviewers who were not affiliated to the surveyed facilities might have  
56  
57 470 mitigated against this.

1  
2  
3 471 Finally, we have been constrained by the lack of consistency in defining quality in the existing  
4  
5 472 literature. Hence, the definition we used could not be refined to certain variables listed by the  
6  
7 473 researchers. The unmeasured factors, however, might influence client's satisfaction.

## 8 9 474 **CONCLUSIONS**

10  
11 475 The women's satisfaction towards antenatal care in public facilities was suboptimal and was  
12  
13 476 dependent on an interplay of factors at various levels. A significant contribution to the variation in  
14  
15 477 client satisfaction was mainly attributed to factors related to the contents of the care received than  
16  
17 478 do structural attributes.

18  
19 479 Indeed, the study suggests that availing inputs may not be enough to ensure in bringing client  
20  
21 480 satisfaction. Rather, providers may need further supporting mechanisms to offer ANC that clients  
22  
23 481 regard as satisfactory. In so doing, facilities will increase the levels of providers' performance and  
24  
25 482 client's satisfaction, and improve the overall quality of care offered at public health facilities.  
26  
27 483 Finally, the context of this study was an exclusively public health facility setting. Therefore, future  
28  
29 484 studies linking different health system complexities would add value to the evidence generated by  
30  
31 485 our study.

32  
33  
34 487 **Acknowledgments:** The authors would like to acknowledge the study participants, the data  
35  
36 488 collectors, and supervisors who made this research possible.

37  
38  
39 490 **Author Contributions:** AAE, GDA, and GTD conceived and designed this study; AAE, GDA,  
40  
41 491 and GTD participated in the data analysis and the interpretation of the findings. AAE wrote the  
42  
43 492 first draft of the manuscript and; AAE, GDA, and GTD made a critical review of the manuscript.  
44  
45 493 All authors read, edited and approved the final manuscript.

46  
47 494 **Funding:** This work was supported by Bahir Dar University [grant number: RCS/252/09].

48  
49 495 **Disclaimer:** The funders had no roles in study design, fieldwork, data analysis, interpretation, and  
50  
51 496 decision to publish the manuscript.

52  
53 497 **Competing interests:** None declared.

54  
55 498 **Patient consent for publication:** Not required.

1  
2  
3 499 **Ethics approval:** the study received ethical approval from the Ethical Review Board of Bahir Dar  
4  
5 500 University (protocol no.: 087/18-04). A formal letter of permission was granted from the Amhara  
6  
7 501 Regional Health Bureau and line offices. The person in charge of each facility and care providers  
8  
9 502 were informed and their agreement received before the onset of data collection. Moreover, all the  
10  
11 503 study participants were informed about the purpose of the study, their right to refuse and assurance  
12  
13 504 of confidentiality. Then, informed verbal informed consent was obtained from each study  
14  
15 505 participant. Personal identifiers were excluded from the data collection form to maintain privacy  
16  
17 506 and confidentiality.

17 507  
18 508 **Provenance and peer review:** Not commissioned; externally peer- reviewed.

19  
20  
21 509 **Data sharing statement:** All data relevant to the study are included in the article or uploaded as  
22  
23 510 supplementary information.

## 24 25 511 REFERENCES

- 26  
27  
28 512 1. Kanyangarara M, Munos MK, Walker N. Quality of antenatal care service provision in health  
29 513 facilities across sub-Saharan Africa: Evidence from nationally representative health facility assessments.  
30 514 *Journal of global health.* 2017;7(2).  
31 515 2. World Health Organization. Consultation on improving measurement of the quality of maternal,  
32 516 newborn and child care in health facilities: World Health Organization,; 2014. Available from:  
33 517 [https://www.who.int/maternal\\_child\\_adolescent/documents/measuring-care-quality/en/](https://www.who.int/maternal_child_adolescent/documents/measuring-care-quality/en/).  
34 518 3. WHO. WHO recommendations on antenatal care for a positive pregnancy experience. World  
35 519 Health Organization Geneva, Switzerland; 2016.  
36 520 4. Raven JH, Tolhurst RJ, Tang S, Van Den Broek N. What is quality in maternal and neonatal  
37 521 health care? *Midwifery.* 2012;28(5):e676-e83.  
38 522 5. World Health Organization. Trends in maternal mortality 2000 to 2017: estimates by WHO,  
39 523 UNICEF, UNFPA, World Bank Group and the United Nations Population Division; 2019.  
40 524 6. Say L, Chou D, Gemmill A, Tunçalp Ö, Moller A-B, Daniels J, et al. Global causes of maternal  
41 525 death: a WHO systematic analysis. *The Lancet Global Health.* 2014;2(6):e323-e33.  
42 526 7. Osungbade KO, Ayinde OO. Maternal complication prevention: evidence from a case-control  
43 527 study in southwest Nigeria. *African journal of primary health care & family medicine.* 2014;6(1):1-7.  
44 528 8. Kerber KJ, de Graft-Johnson JE, Bhutta ZA, Okong P, Starrs A, Lawn JE. Continuum of care for  
45 529 maternal, newborn, and child health: from slogan to service delivery. *The Lancet.* 2007;370(9595):1358-  
46 530 69.  
47 531 9. Finlayson K, Downe S. Why do women not use antenatal services in low-and middle-income  
48 532 countries? A meta-synthesis of qualitative studies. *PLoS medicine.* 2013;10(1):e1001373.  
49 533 10. World Health Organization. Daily iron supplementation in adult women and adolescent girls.  
50 534 Geneva, Switzerland. 2016. Available from:  
51 535 [https://www.who.int/nutrition/publications/micronutrients/guidelines/daily\\_iron\\_supp\\_womenandgirls/en/](https://www.who.int/nutrition/publications/micronutrients/guidelines/daily_iron_supp_womenandgirls/en/)  
52 536 [/](#).

- 1  
2  
3 537 11. Horn F, Sabova L, Pinterova E, Hornova J, Trnka J. Prevention of neural tube defects by folic  
4 538 acid-awareness among women of childbearing age in Slovakia. *Bratislavske lekarske listy*.  
5 539 2014;115(2):91-7.
- 6 540 12. World Health Organization. Service availability and readiness assessment (SARA): an annual  
7 541 monitoring system for service delivery: reference manual: World Health Organization; 2013. Available  
8 542 from: [https://www.who.int/healthinfo/systems/sara\\_reference\\_manual/en/](https://www.who.int/healthinfo/systems/sara_reference_manual/en/).
- 9 543 13. Medhanyie A, Spigt M, Kifle Y, Schaay N, Sanders D, Blanco R, et al. The role of health  
10 544 extension workers in improving utilization of maternal health services in rural areas in Ethiopia: a cross  
11 545 sectional study. *BMC health services research*. 2012;12(1):352.
- 12 546 14. Primary health care systems (PRIMASYS): case study from Ethiopia, abridged version. Geneva:  
13 547 World Health Organization; 2017. Licence: CC BY-NC-SA 3.0 IGO.
- 14 548 15. EPHI, FMOH, WHO. Ethiopia Service Availability and Readiness Assessment: 2016 Summary  
15 549 Report. Addis Ababa Ethiopia. January 2016 [https://www.washinhcf.org/documents/Final-SARA-](https://www.washinhcf.org/documents/Final-SARA-Report-Jan-2017.pdf)  
16 550 [Report-Jan-2017.pdf](https://www.washinhcf.org/documents/Final-SARA-Report-Jan-2017.pdf) Access date: Nov 30,2017.
- 17 551 16. Central Statistical Agency (CSA) [Ethiopia] and ICF. 2016 Ethiopia Demographic and Health  
18 552 Survey Key Findings. Addis Ababa, Ethiopia, and Rockville, Maryland, USA. CSA and ICF, 2017.
- 19 553 17. Brizuela V, Leslie HH, Sharma J, Langer A, Tunçalp Ö. Measuring quality of care for all women  
20 554 and newborns: how do we know if we are doing it right? A review of facility assessment tools. *The*  
21 555 *Lancet Global Health*. 2019;7(5):e624-e32.
- 22 556 18. Braithwaite J, Hibbert P, Blakely B, Plumb J, Hannaford N, Long JC, et al. Health system  
23 557 frameworks and performance indicators in eight countries: a comparative international analysis. *SAGE*  
24 558 *open medicine*. 2017;5:2050312116686516.
- 25 559 19. Sheffel A, Karp C, Creanga AA. Use of Service Provision Assessments and Service Availability  
26 560 and Readiness Assessments for monitoring quality of maternal and newborn health services in low-  
27 561 income and middle-income countries. *BMJ global health*. 2018;3(6):e001011.
- 28 562 20. Larson E, Sharma J, Bohren MA, Tunçalp Ö. When the patient is the expert: measuring patient  
29 563 experience and satisfaction with care. *Bulletin of the World Health Organization*. 2019;97(8):563.
- 30 564 21. Donabedian A. The quality of care: how can it be assessed? *Jama*. 1988;260(12):1743-8.
- 31 565 22. Tunçalp Ö, Were W, MacLennan C, Oladapo O, Gülmezoglu A, Bahl R, et al. Quality of care for  
32 566 pregnant women and newborns—the WHO vision. *BJOG: an international journal of obstetrics &*  
33 567 *gynaecology*. 2015;122(8):1045-9.
- 34 568 23. Sharma J, Leslie HH, Kundu F, Kruk ME. Poor quality for poor women? Inequities in the quality  
35 569 of antenatal and delivery care in Kenya. *PloS one*. 2017;12(1).
- 36 570 24. Afulani PA, Phillips B, Aborigo RA, Moyer CA. Person-centred maternity care in low-income  
37 571 and middle-income countries: analysis of data from Kenya, Ghana, and India. *The Lancet Global Health*.  
38 572 2019;7(1):e96-e109.
- 39 573 25. Heredia-Pi I, Servan-Mori E, Darney BG, Reyes-Morales H, Lozano R. Measuring the adequacy  
40 574 of antenatal health care: a national cross-sectional study in Mexico. *Bulletin of the World Health*  
41 575 *Organization*. 2016;94(6):452.
- 42 576 26. Desalegn DM, Abay S, Taye B. The availability and functional status of focused antenatal care  
43 577 laboratory services at public health facilities in Addis Ababa, Ethiopia. *BMC research notes*.  
44 578 2016;9(1):403.
- 45 579 27. Alemu Y, Aragaw A. Early initiations of first antenatal care visit and associated factor among  
46 580 mothers who gave birth in the last six months preceding birth in Bahir Dar Zuria Woreda North West  
47 581 Ethiopia. *Reproductive health*. 2018;15(1):203.
- 48 582 28. Ewunetie AA, Munea AM, Meselu BT, Simeneh MM, Meteku BT. DELAY on first antenatal  
49 583 care visit and its associated factors among pregnant women in public health facilities of Debre Markos  
50 584 town, North West Ethiopia. *BMC pregnancy and childbirth*. 2018;18(1):173.
- 51 585 29. Lakew S, Ankala A, Jemal F. Determinants of client satisfaction to skilled antenatal care services  
52 586 at Southwest of Ethiopia: a cross-sectional facility based survey. *BMC pregnancy and childbirth*.  
53 587 2018;18(1):479.

- 1  
2  
3 588 30. Hanefeld J, Powell-Jackson T, Balabanova D. Understanding and measuring quality of care:  
4 589 dealing with complexity. *Bulletin of the World Health Organization*. 2017;95(5):368.
- 5 590 31. West Gojjam Zone Health Office. The 2016/17 Fiscal Year Annual performance report of West  
6 591 Gojjam Zone, Finote Selam ; July, 2017.
- 7 592 32. Turner AG, Angeles G, Tsui AO, Wilkinson M, Magnani R. Sampling manual for facility surveys  
8 593 for population, maternal health, child health and STD programs in developing countries. 2000.
- 9 594 33. Emiru AA, Alene GD, Debelew GT. Women's retention on the continuum of maternal care  
10 595 pathway in west Gojjam zone, Ethiopia: multilevel analysis. *BMC Pregnancy and Childbirth*. 2020;20:1-  
11 596 14.
- 12 597 34. Emiru AA, Alene GD, Debelew GT. The role of maternal health care services as predictors of  
13 598 time to modern contraceptive use after childbirth in Northwest Ethiopia: Application of the shared frailty  
14 599 survival analysis. *PloS one*. 2020;15(2):e0228678.
- 15 600 35. FMOH. Basic Emergency obstetric and Newborn Care (BEmONC) training manual. Federal  
16 601 Democratic Republic of Ethiopia Ministry of Health , Addis Ababa, Ethiopia, 2013.
- 17 602 36. Hair J, Black WC, Babin BJ, Anderson RE. *Multivariate data analysis: International version*. New  
18 603 Jersey, Pearson. 2010.
- 19 604 37. Williams R. Generalized ordered logit/partial proportional odds models for ordinal dependent  
20 605 variables. *The Stata Journal*. 2006;6(1):58-82.
- 21 606 38. Do M, Wang W, Hembling J, Ametepi P. Quality of antenatal care and client satisfaction in  
22 607 Kenya and Namibia. *International Journal for Quality in Health Care*. 2017;29(2):183-93.
- 23 608 39. Rahman MM, Ngadan DP, Arif MT. Factors affecting satisfaction on antenatal care services in  
24 609 Sarawak, Malaysia: evidence from a cross sectional study. *SpringerPlus*. 2016;5(1):725.
- 25 610 40. Tetui M, Ekirapa EK, Bua J, Mutebi A. Quality of Antenatal care services in eastern Uganda:  
26 611 implications for interventions. *Pan African Medical Journal*. 2012;13(1).
- 27 612 41. Ghobashi M, Khandekar R. Satisfaction among expectant mothers with antenatal care services in  
28 613 the Musandam Region of Oman. *Sultan Qaboos University Medical Journal*. 2008;8(3):325.
- 29 614 42. Onyeajam DJ, Xirasagar S, Khan MM, Hardin JW, Odutolu O. Antenatal care satisfaction in a  
30 615 developing country: a cross-sectional study from Nigeria. *BMC public health*. 2018;18(1):368.
- 31 616 43. Rani M, Bonu S, Harvey S. Differentials in the quality of antenatal care in India. *International*  
32 617 *journal for quality in health care*. 2007;20(1):62-71.
- 33 618 44. Tafese F, Woldie M, Megerssa B. Quality of family planning services in primary health centers of  
34 619 Jimma Zone, Southwest Ethiopia. *Ethiopian journal of health sciences*. 2013;23(3):245-54.
- 35 620 45. Tancred T, Schellenberg J, Marchant T. Using mixed methods to evaluate perceived quality of  
36 621 care in southern Tanzania. *International journal for quality in health care*. 2016;28(2):233-9.
- 37 622 46. Owili PO, Muga MA, Mendez BR, Chen B. Quality of care in six sub-Saharan Africa countries: a  
38 623 provider-based study on adherence to WHO's antenatal care guideline. *International Journal for Quality*  
39 624 *in Health Care*. 2018;31(1):43-8.
- 40 625 47. Chemir F, Alemseged F, Workneh D. Satisfaction with focused antenatal care service and  
41 626 associated factors among pregnant women attending focused antenatal care at health centers in Jimma  
42 627 town, Jimma zone, South West Ethiopia; a facility based cross-sectional study triangulated with  
43 628 qualitative study. *BMC research notes*. 2014;7(1):164.
- 44 629 48. Tran TK, Gottvall K, Nguyen HD, Ascher H, Petzold M. Factors associated with antenatal care  
45 630 adequacy in rural and urban contexts—results from two health and demographic surveillance sites in  
46 631 Vietnam. *BMC health services research*. 2012;12(1):40.
- 47 632 49. Adeyinka O, Jukic AM, McGarvey ST, Muasau-Howard BT, Hawley NL. Predictors of prenatal  
48 633 care satisfaction among pregnant women in American Samoa. *BMC pregnancy and childbirth*.  
49 634 2017;17(1):381.
- 50 635 50. Birhanu Z, Assefa T, Woldie M, Morankar S. Determinants of satisfaction with health care  
51 636 provider interactions at health centres in central Ethiopia: a cross sectional study. *BMC health services*  
52 637 *research*. 2010;10(1):78.



1  
2  
3  
4  
5  
6  
7  
8  
9  
10  
11  
12  
13  
14  
15  
16  
17  
18  
19  
20  
21  
22  
23  
24  
25  
26  
27  
28  
29  
30  
31  
32  
33  
34  
35  
36  
37  
38  
39  
40  
41  
42  
43  
44  
45  
46  
47  
48  
49  
50  
51  
52  
53  
54  
55  
56  
57  
58  
59  
60

638 51. Roomruangwong C, Kanchanatawan B, Sirivichayakul S, Maes M. High incidence of body image  
639 dissatisfaction in pregnancy and the postnatal period: Associations with depression, anxiety, body mass  
640 index and weight gain during pregnancy. *Sexual & Reproductive Healthcare*. 2017;13:103-9.  
641 52. Leonard K, Masatu MC. Outpatient process quality evaluation and the Hawthorne Effect. *Social  
642 science & medicine*. 2006;63(9):2330-40.

643

For peer review only

**Supplementary file 1: Availability and functionality of items among hospitals and health centers offering ANC services in West Gojjam Zone, Northwest Ethiopia.**

| No       | Items per dimension                                                               | Facility Type      |                          | Total<br>(n=15) |
|----------|-----------------------------------------------------------------------------------|--------------------|--------------------------|-----------------|
|          |                                                                                   | Hospitals<br>(n=5) | Health centers<br>(n=10) |                 |
| <b>1</b> | <b>Availability of infrastructure (7)</b>                                         |                    |                          |                 |
|          | ▪ Water within the compound                                                       | 5                  | 5                        | 10              |
|          | ▪ Electricity from any source (e.g. electricity grid, generator, solar, or other) | 5                  | 5                        | 10              |
|          | ▪ Ambulance/any vehicle for emergence (available free of charges)                 | 4                  | 4                        | 8               |
|          | ▪ Functioning landline telephone or a mobile phone supported by the facility      | 5                  | 6                        | 11              |
|          | ▪ Functioning computer                                                            | 4                  | 6                        | 10              |
|          | ▪ Internet access within the facility                                             | 1                  | ---                      | 1               |
|          | ▪ Separate room for ANC consultations with auditory and visual privacy            | 5                  | 8                        | 13              |
|          | <b>Group average</b>                                                              |                    |                          | <b>9</b>        |
| <b>2</b> | <b>Essential equipment(10)</b>                                                    |                    |                          |                 |
|          | ▪ Blood pressure apparatus                                                        | 5                  | 8                        | 13              |
|          | ▪ Stethoscope                                                                     | 5                  | 9                        | 13              |
|          | ▪ Thermometer                                                                     | 4                  | 7                        | 11              |
|          | ▪ Adult scale(Functional)                                                         | 8                  | 5                        | 12              |
|          | ▪ Fetoscope                                                                       | 5                  | 10                       | 15              |
|          | ▪ Gloves( non-sterile)                                                            | 5                  | 10                       | 15              |
|          | ▪ Gloves sterile                                                                  | 5                  | 9                        | 14              |
|          | ▪ Vacuum aspiration equipment (MVA) set                                           | 5                  | 3                        | 8               |
|          | ▪ Suction apparatus                                                               | 5                  | 7                        | 12              |
|          | ▪ MUAC Tape mother                                                                | 3                  | 6                        | 9               |
|          | <b>Group average</b>                                                              |                    |                          | <b>12</b>       |
| <b>3</b> | <b>Availability of essential drugs and vaccines (14)</b>                          |                    |                          |                 |

|   |                                                           |          |           |           |           |
|---|-----------------------------------------------------------|----------|-----------|-----------|-----------|
|   | • Tetanus toxoid                                          | 5        | 10        | 15        |           |
|   | • Iron/ Folic acid                                        | 4        | 9         | 13        |           |
|   | • IV fluids(of any type)                                  | 5        | 7         | 12        |           |
|   | • Magnesium sulfate (injection)                           | 3        | ---       | 3         |           |
|   | • Calcium gluconate                                       | 2        | -----     | 2         |           |
|   | • Antiretroviral drugs                                    | 5        | 4         | 9         |           |
|   | • Insecticide treated bed nets                            | -----    | 2         | 2         |           |
|   | • Anti-malaria drugs (Quartum, Quinine, and other)        | 4        | 7         | 11        |           |
|   | • Anti-helminthes (mebendazole or others)                 | 5        | 9         | 14        |           |
|   | • Cotrimoxazole                                           | 5        | 8         | 13        |           |
|   | • Parenteral antibiotics                                  | 5        | 3         | 8         |           |
|   | • Methyldopa or propranolol or any other antihypertensive | 5        | 3         | 8         |           |
|   | • Diazepam (injection)                                    | 4        | 5         | 9         |           |
|   | • Parenteral oxytocic                                     | 5        | 10        | 15        |           |
|   | <b>Group average</b>                                      |          |           | <b>10</b> |           |
| 4 | Diagnostic Capacities (8)                                 |          |           |           |           |
|   | ▪ Urine pregnancy test (HCG)                              | 4        | 5         | 9         |           |
|   | ▪ .Hemoglobin test                                        | 4        | 6         | 10        |           |
|   | ▪ Blood and RH grouping                                   | 5        | 8         | 13        |           |
|   | ▪ .Malaria diagnostic capacity                            | 5        | 9         | 14        |           |
|   | ▪ Proteinuria test                                        | 5        | 7         | 12        |           |
|   | ▪ RPR for Syphilis                                        | 4        | 8         | 12        |           |
|   | ▪ HIV test                                                | 5        | 8         | 13        |           |
|   | ▪ Urinalysis for bacteriuria                              | 5        | 8         | 13        |           |
|   | <b>Group average</b>                                      |          |           | <b>12</b> |           |
| 5 | Staffing and guidelines/job aids                          | Standard | Available | Standard  | Available |

|            |                                            |    |          |               |     |           |
|------------|--------------------------------------------|----|----------|---------------|-----|-----------|
| <b>I</b>   | <b>Staffing</b>                            |    |          |               |     |           |
|            | Generalist(non-specialist) medical doctors | 14 | 5        | 1             | --- | 5         |
|            | Gynecologist and obstetrician              | 2  | -----    |               |     | ----      |
|            | Health officer                             |    |          | 2             | 10  | 10/10     |
|            | Nurses of all categories                   | 97 | 1        | 5             | 10  | 11        |
|            | Midwives                                   | 13 | 4        | 3             | 8   | 12        |
|            | Laboratory technicians/technologists       | 10 | 5        | 2             | 10  | 15        |
|            | Pharmacist or pharmacy technician          | 10 | 4        | 3             | 9   | 13        |
| <b>II.</b> | <b>ANC checklists and/job aids</b>         |    | Hospital | Health center |     |           |
|            |                                            |    | 4        | 7             |     | 11        |
|            | <b>Group average</b>                       |    |          |               |     | <b>11</b> |
|            | <b>Total structural Score (Average)</b>    |    |          |               |     | <b>11</b> |

**Supplementary file 2: Summary of the procedures and processes of care provided during antenatal visit in west Gojjam Zone, Northwest Ethiopia**

| <b>Clinical observation</b>                                                  |                                                                                                                            |                     |               |                  |
|------------------------------------------------------------------------------|----------------------------------------------------------------------------------------------------------------------------|---------------------|---------------|------------------|
| <b>1</b>                                                                     | <b>Interpersonal performance(6)</b>                                                                                        | Hospital<br>(n=130) | HC<br>(n=665) | Total<br>(n=795) |
| 1                                                                            | The health worker greeted women in a friendly way                                                                          | 62                  | 335           | 397              |
| 2                                                                            | The health worker introduced him self                                                                                      | 49                  | 260           | 309              |
| 3                                                                            | The health worker called the client by name                                                                                | 77                  | 291           | 368              |
| 4                                                                            | The health worker ensured privacy (visual and auditory)                                                                    | 103                 | 533           | 636              |
| 5                                                                            | The health worker encouraged women to ask questions                                                                        | 99                  | 576           | 675              |
| 6                                                                            | Gave attention to what the woman talks about                                                                               | 78                  | 398           | 476              |
| <b>INTERPERSONAL PERFORMANCE</b>                                             |                                                                                                                            |                     |               | <b>477</b>       |
| <b>2</b>                                                                     | <b>Technical performance(40)</b>                                                                                           |                     |               |                  |
| <b>A</b>                                                                     | <b>history taking(12)</b>                                                                                                  |                     |               |                  |
| 1                                                                            | The health worker asked or checked client card about her age                                                               | 97                  | 525           | 622              |
| 2                                                                            | The health worker asked about number of previous pregnancies                                                               | 100                 | 513           | 613              |
| 3                                                                            | The health worker asked about duration of present pregnancy                                                                | 102                 | 555           | 657              |
| 4                                                                            | The health worker asked about the previous obstetric history, if relevant (such as stillbirth, abortion, neonatal loss...) | 82                  | 436           | 518              |
| 5                                                                            | The health worker asks asked about any co-morbidity( hypertension, DM)                                                     | 86                  | 438           | 524              |
| 6                                                                            | The health worker asked whether the woman feel fetal movements, if relevant [consider GA and parity]                       | 96                  | 472           | 568              |
| Asks whether she has experienced any of the following for current pregnancy: |                                                                                                                            |                     |               |                  |
| 7                                                                            | Vaginal bleeding                                                                                                           | 96                  | 510           | 606              |

|          |                                                         |     |     |            |
|----------|---------------------------------------------------------|-----|-----|------------|
| 8        | Fever                                                   | 92  | 471 | 563        |
| 9        | Severe headaches and/or blurred vision                  | 99  | 518 | 617        |
| 10       | Swollen face or hands                                   | 104 | 541 | 645        |
| 11       | Convulsions or loss of consciousness                    | 72  | 402 | 474        |
| 12       | Severe abdominal pain                                   | 94  | 467 | 561        |
|          | <b>Average</b>                                          |     |     | 580        |
| <b>B</b> | <b>CLINICAL EXAMINATION(9)</b>                          |     |     |            |
| 1        | Check weight                                            | 95  | 484 | 579        |
| 2        | Take blood pressure                                     | 91  | 455 | 546        |
| 3        | Measured MUAC                                           | 60  | 348 | 408        |
| 4        | Check signs of anemia                                   | 84  | 432 | 516        |
| 5        | Check for edema                                         | 102 | 452 | 554        |
|          | Performs the following steps for abdominal examination: |     |     |            |
| 6        | Inspect abdomen                                         | 108 | 556 | 664        |
| 7        | Palpate abdomen for size and fetal position             | 111 | 574 | 685        |
| 8        | measure fundal height with measuring tape               | 78  | 414 | 492        |
| 9        | Checks fetal heart rate with fetoscope                  | 92  | 474 | 566        |
|          | <b>Average</b>                                          |     |     | <b>557</b> |
| <b>C</b> | <b>Laboratory tests &amp; preventive measures (9)</b>   |     |     |            |
|          | <b>Laboratory examinations(6)</b>                       |     |     |            |
| 1        | urine protein test                                      | 120 | 379 | 499        |
| 2        | Urinalysis for bacteriuria                              | 39  | 211 | 250        |
| 3        | Hemoglobin or HCT                                       | 76  | 379 | 455        |

|    |                                                         |     |     |            |
|----|---------------------------------------------------------|-----|-----|------------|
| 4  | ABO blood grouping/RH Factor                            | 98  | 469 | 567        |
| 5  | HIV Test                                                | 120 | 619 | 739        |
| 6  | RPR for Syphilis                                        | 74  | 373 | 447        |
|    | Preventive measures(3)                                  |     |     |            |
| 7  | checked for anemia and prescribed iron/folic acid       | 117 | 575 | 692        |
| 8  | Deworming checked and given if eligible                 | 26  | 115 | 141        |
| 9  | Tetanus toxoid immunization status is checked and given | 117 | 605 | 722        |
|    | <b>Average</b>                                          |     |     | <b>501</b> |
| D  | Counselling given on the following topics(10)           |     |     |            |
| 1  | Discuss about place of delivery                         | 95  | 476 | 571        |
| 2  | Inform about birth preparedness & emergency readiness   | 100 | 503 | 603        |
| 3  | Diet and nutrition                                      | 106 | 556 | 662        |
| 4  | Personal hygiene and self-care                          | 94  | 465 | 559        |
| 5  | Importance of bed-nets                                  | 68  | 505 | 573        |
| 6  | Information on signs of true labor                      | 78  | 385 | 463        |
| 7  | postpartum family planning                              | 61  | 316 | 377        |
| 8  | HIV and PMTCT                                           | 106 | 550 | 656        |
| 9  | Counsel on STI including syphilis                       | 75  | 377 | 452        |
| 10 | Danger signs of pregnancy and actions to be taken       | 102 | 472 | 574        |
|    | <b>Average for counseling</b>                           |     |     | <b>549</b> |
|    | <b>Average for technical performance</b>                |     |     | <b>475</b> |

**Supplementary file 3: Brant test of parallel regression assumption using the 0.05 level of significance**

| SN | Variables                                                  | P- value      |
|----|------------------------------------------------------------|---------------|
| 1  | Address                                                    | 0.5174        |
| 2  | Age of women                                               | 0.0760        |
| 3  | Educational status                                         | <b>0.0007</b> |
| 4  | Distance to health facility                                | <b>0.0036</b> |
| 5  | Number of live births                                      | 0.6005        |
| 6  | Gestational Age at the time survey                         | 0.1948        |
| 7  | Number of ANC visits                                       | <b>0.0075</b> |
| 8  | Service Year of the provider                               | 0.6578        |
| 9  | Supervision received by the provider                       | 0.1059        |
| 10 | Availability of Physical infrastructure( composite index ) | 0.2240        |
| 11 | Availability of essential drugs ( composite index )        | 0.3239        |
| 12 | Interpersonal communication ( composite index )            | 0.3559        |
| 13 | Skills in history taking ( composite index )               | 0.5167        |
| 14 | Skills in physical examination ( composite index )         | <b>0.0005</b> |
| 15 | Counseling skills ( composite index )                      | 0.8421        |
| 16 | Health Screening ( composite index )                       | 0.1398        |

*Note: A significant test statistic provides evidence that the parallel regression assumption has been violated.*



STROBE Statement—Checklist of items that should be included in reports of *cross-sectional studies*

|                              | Item No | Recommendation                                                                                                                                                                                    | Page No  |
|------------------------------|---------|---------------------------------------------------------------------------------------------------------------------------------------------------------------------------------------------------|----------|
| <b>Title and abstract</b>    | 1       | (a) Indicate the study's design with a commonly used term in the title or the abstract                                                                                                            | 2        |
|                              |         | (b) Provide in the abstract an informative and balanced summary of what was done and what was found                                                                                               | 2        |
| <b>Introduction</b>          |         |                                                                                                                                                                                                   |          |
| Background/rationale         | 2       | Explain the scientific background and rationale for the investigation being reported                                                                                                              | 2-5      |
| Objectives                   | 3       | State specific objectives, including any prespecified hypotheses                                                                                                                                  | 2        |
| <b>Methods</b>               |         |                                                                                                                                                                                                   |          |
| Study design                 | 4       | Present key elements of study design early in the paper                                                                                                                                           | 5        |
| Setting                      | 5       | Describe the setting, locations, and relevant dates, including periods of recruitment, exposure, follow-up, and data collection                                                                   | 5,6,7    |
| Participants                 | 6       | (a) Give the eligibility criteria, and the sources and methods of selection of participants                                                                                                       | 5        |
| Variables                    | 7       | Clearly define all outcomes, exposures, predictors, potential confounders, and effect modifiers. Give diagnostic criteria, if applicable                                                          | 7,8,9    |
| Data sources/<br>measurement | 8*      | For each variable of interest, give sources of data and details of methods of assessment (measurement). Describe comparability of assessment methods if there is more than one group              | 7,8,9    |
| Bias                         | 9       | Describe any efforts to address potential sources of bias                                                                                                                                         | 6,9,10   |
| Study size                   | 10      | Explain how the study size was arrived at                                                                                                                                                         | 5,6      |
| Quantitative variables       | 11      | Explain how quantitative variables were handled in the analyses. If applicable, describe which groupings were chosen and why                                                                      | 9        |
| Statistical methods          | 12      | (a) Describe all statistical methods, including those used to control for confounding                                                                                                             | 9-10     |
|                              |         | (b) Describe any methods used to examine subgroups and interactions                                                                                                                               | 9-10     |
|                              |         | (c) Explain how missing data were addressed                                                                                                                                                       |          |
|                              |         | (d) If applicable, describe analytical methods taking account of sampling strategy                                                                                                                | 9-10     |
|                              |         | (e) Describe any sensitivity analyses                                                                                                                                                             | 9-10     |
| <b>Results</b>               |         |                                                                                                                                                                                                   |          |
| Participants                 | 13*     | (a) Report numbers of individuals at each stage of study—eg numbers potentially eligible, examined for eligibility, confirmed eligible, included in the study, completing follow-up, and analysed | 10       |
|                              |         | (b) Give reasons for non-participation at each stage                                                                                                                                              | 10       |
|                              |         | (c) Consider use of a flow diagram                                                                                                                                                                |          |
| Descriptive data             | 14*     | (a) Give characteristics of study participants (eg demographic, clinical, social) and information on exposures and potential confounders                                                          | 10,11,12 |
|                              |         | (b) Indicate number of participants with missing data for each variable of interest                                                                                                               | 10,11,12 |
| Outcome data                 | 15*     | Report numbers of outcome events or summary measures                                                                                                                                              | 14       |

|    |                          |    |                                                                                                                                                                                                              |
|----|--------------------------|----|--------------------------------------------------------------------------------------------------------------------------------------------------------------------------------------------------------------|
| 1  |                          |    |                                                                                                                                                                                                              |
| 2  | Main results             | 16 | (a) Give unadjusted estimates and, if applicable, confounder-adjusted estimates and their precision (eg, 95% confidence interval). Make clear which confounders were adjusted for and why they were included |
| 3  |                          |    | 15-17                                                                                                                                                                                                        |
| 4  |                          |    |                                                                                                                                                                                                              |
| 5  |                          |    |                                                                                                                                                                                                              |
| 6  |                          |    | (b) Report category boundaries when continuous variables were categorized                                                                                                                                    |
| 7  |                          |    | 17                                                                                                                                                                                                           |
| 8  |                          |    |                                                                                                                                                                                                              |
| 9  |                          |    | (c) If relevant, consider translating estimates of relative risk into absolute risk for a meaningful time period                                                                                             |
| 10 |                          |    | 17                                                                                                                                                                                                           |
| 11 | Other analyses           | 17 | Report other analyses done—eg analyses of subgroups and interactions, and sensitivity analyses                                                                                                               |
| 12 |                          |    | 12-13                                                                                                                                                                                                        |
| 13 |                          |    |                                                                                                                                                                                                              |
| 14 | <b>Discussion</b>        |    |                                                                                                                                                                                                              |
| 15 | Key results              | 18 | Summarise key results with reference to study objectives                                                                                                                                                     |
| 16 |                          |    | 17-19                                                                                                                                                                                                        |
| 17 | Limitations              | 19 | Discuss limitations of the study, taking into account sources of potential bias or imprecision. Discuss both direction and magnitude of any potential bias                                                   |
| 18 |                          |    | 19-20                                                                                                                                                                                                        |
| 19 |                          |    |                                                                                                                                                                                                              |
| 20 | Interpretation           | 20 | Give a cautious overall interpretation of results considering objectives, limitations, multiplicity of analyses, results from similar studies, and other relevant evidence                                   |
| 21 |                          |    | 20                                                                                                                                                                                                           |
| 22 |                          |    |                                                                                                                                                                                                              |
| 23 |                          |    |                                                                                                                                                                                                              |
| 24 | Generalisability         | 21 | Discuss the generalisability (external validity) of the study results                                                                                                                                        |
| 25 |                          |    | 20                                                                                                                                                                                                           |
| 26 | <b>Other information</b> |    |                                                                                                                                                                                                              |
| 27 | Funding                  | 22 | Give the source of funding and the role of the funders for the present study and, if applicable, for the original study on which the present article is based                                                |
| 28 |                          |    | 21                                                                                                                                                                                                           |
| 29 |                          |    |                                                                                                                                                                                                              |
| 30 |                          |    |                                                                                                                                                                                                              |

31 \*Give information separately for exposed and unexposed groups.

32  
33  
34 **Note:** An Explanation and Elaboration article discusses each checklist item and gives methodological background and published examples of transparent reporting. The STROBE checklist is best used in conjunction with this article (freely available on the Web sites of PLoS Medicine at <http://www.plosmedicine.org/>, Annals of Internal Medicine at <http://www.annals.org/>, and Epidemiology at <http://www.epidem.com/>). Information on the STROBE Initiative is available at [www.strobe-statement.org](http://www.strobe-statement.org).

35  
36  
37  
38  
39  
40  
41  
42  
43  
44  
45  
46  
47  
48  
49  
50  
51  
52  
53  
54  
55  
56  
57  
58  
59  
60

# BMJ Open

## Women's Satisfaction with the Quality of Antenatal Care Services Rendered at Public Health Facilities in Northwest Ethiopia: the application of partial proportional odds model

|                                 |                                                                                                                                                                                         |
|---------------------------------|-----------------------------------------------------------------------------------------------------------------------------------------------------------------------------------------|
| Journal:                        | <i>BMJ Open</i>                                                                                                                                                                         |
| Manuscript ID                   | bmjopen-2020-037085.R2                                                                                                                                                                  |
| Article Type:                   | Original research                                                                                                                                                                       |
| Date Submitted by the Author:   | 27-Jul-2020                                                                                                                                                                             |
| Complete List of Authors:       | Emiru, Amanu; Bahir Dar University, Reproductive Health and Population Studies<br>Alene, GD; Bahir Dar University, Epidemiology and Biostatistics<br>Debelew, Gurmesa; Jimma University |
| <b>Primary Subject Heading</b>: | Public health                                                                                                                                                                           |
| Secondary Subject Heading:      | Epidemiology                                                                                                                                                                            |
| Keywords:                       | Antenatal < GENETICS, Quality in health care < HEALTH SERVICES ADMINISTRATION & MANAGEMENT, Organisation of health services < HEALTH SERVICES ADMINISTRATION & MANAGEMENT               |
|                                 |                                                                                                                                                                                         |

SCHOLARONE™  
Manuscripts



I, the Submitting Author has the right to grant and does grant on behalf of all authors of the Work (as defined in the below author licence), an exclusive licence and/or a non-exclusive licence for contributions from authors who are: i) UK Crown employees; ii) where BMJ has agreed a CC-BY licence shall apply, and/or iii) in accordance with the terms applicable for US Federal Government officers or employees acting as part of their official duties; on a worldwide, perpetual, irrevocable, royalty-free basis to BMJ Publishing Group Ltd ("BMJ") its licensees and where the relevant Journal is co-owned by BMJ to the co-owners of the Journal, to publish the Work in this journal and any other BMJ products and to exploit all rights, as set out in our [licence](#).

The Submitting Author accepts and understands that any supply made under these terms is made by BMJ to the Submitting Author unless you are acting as an employee on behalf of your employer or a postgraduate student of an affiliated institution which is paying any applicable article publishing charge ("APC") for Open Access articles. Where the Submitting Author wishes to make the Work available on an Open Access basis (and intends to pay the relevant APC), the terms of reuse of such Open Access shall be governed by a Creative Commons licence – details of these licences and which [Creative Commons](#) licence will apply to this Work are set out in our licence referred to above.

Other than as permitted in any relevant BMJ Author's Self Archiving Policies, I confirm this Work has not been accepted for publication elsewhere, is not being considered for publication elsewhere and does not duplicate material already published. I confirm all authors consent to publication of this Work and authorise the granting of this licence.

1  
2  
3 1 Women's Satisfaction with the Quality of Antenatal Care Services Rendered at  
4  
5 2 Public Health Facilities in Northwest Ethiopia: the application of partial proportional  
6  
7 3 odds model  
8  
9

10 4 **Authors:**

11  
12 5 Amanu Aragaw Emiru<sup>1</sup>  
13 6 Getu Degu Alene<sup>2</sup>  
14 7 Gurmesa Tura Debelew<sup>3</sup>  
15  
16 8  
17 9

18  
19 10 **Author Affiliation and Addresses:**

20  
21 11 <sup>1</sup>Department of Reproductive Health and Population Studies, College of Medicine and Health  
22 12 Sciences, Bahir Dar University, Bahir Dar, Ethiopia. Email: [amanuaragaw@yahoo.com](mailto:amanuaragaw@yahoo.com)

23 13 <sup>2</sup>Department of Epidemiology and Biostatistics, College of Medicine and Health Sciences, Bahir  
24 14 Dar University, Bahir, Ethiopia. Email: [adgetu123@yahoo.com](mailto:adgetu123@yahoo.com)

25 15 <sup>3</sup>Department of Population and Family Health, Faculty of Public Health, Institute of Health,  
26 16 Jimma University, Jimma, Ethiopia. Email: [gurrmesatura@gmail.com](mailto:gurrmesatura@gmail.com)

27  
28  
29  
30  
31  
32  
33 18 **Corresponding author:**

34 19 Amanu Aragaw Emiru: postal address 79; email: [amanuaragaw@yahoo.com](mailto:amanuaragaw@yahoo.com); Telephone; +251-  
35 20 918780295  
36  
37  
38  
39  
40  
41  
42  
43  
44

45 24  
46  
47 25 **Keywords:** antenatal, quality, structure, process, satisfaction  
48  
49  
50  
51  
52  
53  
54 28

55  
56  
57  
58  
59  
60  
26  
27  
28

**Word count** (excluding title page, abstract, references, figures, and tables): 3,935

## 29 ABSTRACT

30 **Objectives:** The study was aimed; 1) To describe the quality of ANC at public health facilities in  
31 Northwest Ethiopia, including dimensions of the structure, process, and outcome; and 2) To assess  
32 the relationship between ANC satisfaction and structure and process dimension of ANC quality

33 **Design:** Cross-sectional

34 **Setting:** Healthcare facilities providing antenatal care services in Northwest Ethiopia.

35 **Participants:** 795 pregnant women attending the antenatal clinics at 15 public health facilities and  
36 41 health workers working for the surveyed facilities.

37 **Outcome measures:** The outcome variable, women's satisfaction with antenatal care was  
38 constructed from multiple satisfaction items using principal component analysis on an ordered,  
39 categorical, and three-point Likert scale. The key hypothesized factors considered were structural  
40 and process aspects of care. Data were analyzed using the partial proportional odds model with  
41 95%CI.

42 **Results:** The result revealed that only 30.3% of the pregnant women were highly satisfied, whereas  
43 31.7% had a lower satisfaction level. The findings showed that process quality indicators better-  
44 predicted client satisfaction. In relation to this, better scores in history taking [ $OR_1=OR_2$ ; 1.81  
45 (95% CI 1.25, 2.60)], counseling [ $OR_1 = OR_2$ ; 1.89 (95% CI 1.33, 2.69)], and screening [ $OR_1=$   
46  $OR_2$ ; 18.10 (95% CI 11.52, 28.39)] were associated with achieving higher satisfaction. We also  
47 observed a significant but lower satisfaction among women in the late trimester of pregnancy [ $OR_1$   
48  $= OR_2$ ; 0.87 (95% CI 0.78, 0.97)]. However, we did not see any significant relationship between  
49 structural variables and client satisfaction.

50 **Conclusions:** The study demonstrated that women's satisfaction with antenatal care was low. The  
51 contents of antenatal care services covered during client-provider interaction were the main factors  
52 affecting client satisfaction. This suggests that efforts are required to improve the competencies of  
53 health professionals to make them more effective while dealing with clients

54

55

## 56 **Strengths and limitations of this study**

- 57     ▪ We tried to assess the three aspects of quality: structure, process, and outcomes
- 58     ▪ The study has utilized different data collection methods including facility survey, client  
59       exit interview, provider interview, and direct observation. Hence, this could increase the  
60       validity of the result and the study.
- 61     ▪ The analysis considered the ordered nature of the outcome variable; previous studies often  
62       dichotomized satisfaction at the cost of losing information
- 63     ▪ However, the presence of an observer during the client-provider interaction might have  
64       biased (Hawthorne effect) the results obtained in a positive direction. In addition, this result  
65       could not be generalized to the pregnant women visiting private facilities, as the pregnant  
66       women visiting them may be different in many aspects.

## 67 **INTRODUCTION**

68 In the past two decades, concerted global efforts have led to increased coverage of maternal health  
69 services, even in poor resource settings[1, 2]. Yet, improvements in health outcomes did not  
70 always follow[2]. Every year, thousands of women die from pregnancy-related complications  
71 worldwide[3, 4]. The Sub-Saharan Africa countries, where Ethiopia is a part, accounted for over  
72 86% of the global maternal deaths in 2017 [5]. Maternal mortality in Ethiopia stands at 412 deaths  
73 per 100,000 live births[6].

74 However, most maternal deaths are avoidable as health solutions to the causes of complications  
75 are well-known [3, 7]. The solution includes a strong health system that provides maternal services  
76 based on a continuum of care perspective [3]. As part of the continuum, the essence of antenatal  
77 care (ANC) serves as a platform for important health care activities [3, 8], including health  
78 promotion and disease prevention, screening, diagnosis, and management of pregnancy-related  
79 complications [9, 10]. As such, antenatal care creates a unique opportunity for early detection and  
80 management of hypertension, gestational diabetes, anemia, malaria, HIV, and other health  
81 conditions which otherwise would jeopardize the health of mothers and the growing fetus[11, 12].

82 Evidence demonstrated that in the presence of adequately resourced healthcare services and  
83 community mobilization, there is an opportunity to improve health service utilization and maternal

1  
2  
3 84 health outcomes [2, 13]. In this regard, the government of Ethiopia has made significant strides  
4  
5 85 towards availing health facilities closer to the community, mainly through constructing primary  
6  
7 86 health care facilities and launching the health extension program[14]. Establishing a voluntary  
8  
9 87 based women health development army (WHDA) to create awareness and increase demand for  
10  
11 88 health services at the community level and waiving user charges for maternity services were also  
12  
13 89 among the new endeavors that the government of Ethiopia has put in place [15].

14  
15 90 While expanding access to health services is an important milestone in Ethiopia, many health  
16  
17 91 facilities started service provision without being adequately equipped with the necessary materials  
18  
19 92 and skilled health workforce[16]. For example, despite 80 percent of the facilities were providing  
20  
21 93 ANC, only 41 percent of them were in a position to provide a high-quality ANC service [16]. This  
22  
23 94 has contributed to a lower rate of maternal health utilization, including ANC services. Improving  
24  
25 95 the quality of ANC services is one of the key elements the health system has to invest in to reduce  
26  
27 96 maternal mortality [1, 3, 4].

27  
28 97 The term quality of care is used widely as a key performance indicator, but there is no universally  
29  
30 98 agreed metrics to measure the quality of care for maternal and newborn health [17-19]. The term  
31  
32 99 quality is a complex concept and described from different perspectives[20]. In the Donabedian  
33  
34 100 model, quality is defined in terms of three major attributes: the structure (resources and  
35  
36 101 organizational structure in health care setting), process (how health service is delivered), and  
37  
38 102 outcome (effect of care on the status of the clients). In this model, client satisfaction was a part of  
39  
40 103 the outcome variables among others[21]. Client satisfaction can be defined as a patient's evaluation  
41  
42 104 of the services offered within the health system, relative to their expectations of care[20].

42  
43 105 In the context of maternity care, a client-centered approach is an important way of understanding  
44  
45 106 the quality of services received or provided [22]. This is especially important in low-and  
46  
47 107 middle-income countries (LMICs) where it is recognized that women typically receive lower-  
48  
49 108 quality health services compared with women in developed countries[23].

50  
51 109 In order to identify the action points to improve the quality of care the World Health Organization  
52  
53 110 (WHO) has developed a framework using different elements from the provision of care as well as  
54  
55 111 the experience of care, integral to maternal and newborn care provided in the facilities[22].



1  
2  
3 112 However, little attempts have been made to provide a complete picture of the quality of ANC  
4 113 delivered by the healthcare system in LMICs[24, 25].  
5  
6

7 114 A body of literature has examined the quality of antenatal care in Ethiopia, yet hardly was any  
8 115 published data that examined all the dimensions of quality simultaneously. The available studies  
9 116 focused largely on the availability of facility inputs [26] or service attendance [27-29], which  
10 117 largely overlooked the information on the content and how care was delivered [30]. Moreover,  
11 118 these studies did not consider the association between client satisfaction and quality measures of  
12 119 the structure and process of ANC. On the other hand, although understanding pregnant women's  
13 120 levels of ANC service satisfaction is imperative to design an approach to meet the needs and  
14 121 expectations of pregnant women [20], this notion has little been explored.  
15  
16

17 122 Therefore, this study was aimed to; 1)describe the quality of ANC at public health facilities  
18 123 including structure, process, and outcome dimensions; and 2) assess the relationship between ANC  
19 124 satisfaction and structure and process dimension of ANC quality.  
20  
21

## 22 125 **METHODS**

### 23 126 **Study design and setting**

24 127 This was a cross-sectional study using a blend of methods (a facility survey, provider interview,  
25 128 direct observation, and client exit interview). The study was conducted in five districts of West  
26 129 Gojjam Zone, Northwest Ethiopia from July to August 2018. At the time of the survey, the Zone  
27 130 had a population of 2,611,925 people with women of reproductive age (15-49) making 23.58 % of  
28 131 the total population. The zone had 6 governmental hospitals, 103 health centers, and 374 health  
29 132 posts. In addition, it had 114 private clinics and 1 private hospital. All maternal health services,  
30 133 including ANC services, were provided free of charge in public health facilities[31].  
31  
32

### 33 134 **Study population and sampling**

34 135 The population consisted of public health facilities that provided ANC, pregnant women attending  
35 136 ANC clinic, maternal health care providers, and health authorities working for the surveyed health  
36 137 facilities.  
37  
38  
39  
40  
41  
42  
43  
44  
45  
46

1  
2  
3 138 This study was part of a large project on the continuum of maternal health care that linked health  
4 139 facility data with a household survey. A number of sampling methods can be used to link  
5 140 characteristics of the sampled facilities to those of the serviced population, yet linking the sample  
6 141 areas(clusters) is the best approach[32] and has been considered in this study. Full details of the  
7 142 sampling procedure for the project have been reported elsewhere[33, 34]. In brief, data from  
8 143 household surveys on access to maternity services were linked to health facility data in the same  
9 144 district. The two studies were timed in such a way that one could inform the next.

15  
16 145 As a first step, a community-based study was conducted using a multistage sampling procedure.  
17 146 For this, the study area was first stratified into 13 rural districts and 2 town administrations. Then,  
18 147 five districts of the zone (4 rural districts and 1 town administration) were selected by a simple  
19 148 random sampling method. Next, 15 kebeles (3 kebeles from each district) were selected using a  
20 149 simple random sampling technique. Kebele is the smallest administrative unit in the Ethiopian  
21 150 context. Hence, in this study, the population-based study was the basis to identify the facilities to  
22 151 be surveyed.

23  
24  
25  
26  
27  
28  
29 152 Secondly, the nearby public facilities at which the women sought care were identified during a  
30 153 house-to-house survey. Once the health care facilities were identified by type and location where  
31 154 they were found facility survey was done across all the selected facilities. The facility reported  
32 155 basic maternity and reproductive health services (including ANC, facility delivery, postnatal care,  
33 156 and family planning) during the last 12 months preceding the survey was the eligibility criteria to  
34 157 select health facilities. The health facility survey was conducted in all the 15 public health  
35 158 facilities: five primary hospitals and ten health centers.

36  
37  
38  
39  
40  
41 159 All the health care providers that were engaged in the provision of ANC in the selected facilities  
42 160 during the data collection period were included in the study. This approach is in accordance with  
43 161 recommendations by Anthony G. Turner and colleagues [32].

44  
45  
46  
47 162 For the satisfaction survey and clinical observation data, a sample size of 824 was calculated using  
48 163 the single population proportion formula based on the following assumptions: 95% confidence  
49 164 level; 5% margin of error, 42% service availability and readiness of public facilities for ANC in  
50 165 Ethiopia [16], design effect of 2, and a 10% non-response rate. Then, the calculated sample size  
51 166 was allocated to each health care facility based on the average daily load of ANC attendees for the

1  
2  
3 167 2016/17 fiscal year. From the sampled facilities, 795 women were selected using a systematic  
4  
5 168 sampling procedure with probability to proportional size method.

### 7 169 **Data collection**

9 170 In this study, an attempt was made to measure all dimensions of the quality of ANC services:  
10  
11 171 structure, process, and outcome. For each dimension of quality, a set of questions were adapted  
12  
13 172 from the WHO guidelines [3, 13], the Ethiopian demographic and health survey[35], and the list  
14  
15 173 of interventions recommended by the federal ministry of health of Ethiopia [36].

16  
17 174 The survey comprised four main data collection methods: 1) Health facility surveys; 2) provider  
18  
19 175 interview; 3) direct observation of ANC consultations; and 4) exit interview with pregnant women.  
20  
21 176 Structured and pre-tested questionnaires were used for service providers and client exit interviews,  
22  
23 177 and checklists were used for facility survey and observation.

24  
25 178 Experienced midwives who were not affiliated with the surveyed healthcare facilities collected the  
26  
27 179 data. In each health facility, a team consisting of two data collectors was assigned. While one of  
28  
29 180 the team members was responsible to carry out the observational study and conduct a healthcare  
30  
31 181 provider interview, the other was responsible for managing the exit interview and doing the facility  
32  
33 182 survey.

34  
35 183 A facility survey of all the selected facilities was carried out to assess the availability of essential  
36  
37 184 materials and staffing. For staffing, the assessment checklist was based on the national staffing  
38  
39 185 standards for each type of health facility. A non-participatory observation was also made among  
40  
41 186 41 maternal health workers who were working at the ANC clinic during the time of the survey.  
42  
43 187 This was aimed to evaluate whether health care workers conformed in interaction and conducting  
44  
45 188 key ANC tests or examinations. When possible, the health workers who were observed were also  
46  
47 189 interviewed, but when this was not possible, other providers of antenatal care service were  
48  
49 190 substituted. Following her consultation, each pregnant woman was interviewed at the exit to assess  
50  
51 191 the level of satisfaction on the service she received.

### 52 192 **Variables and Measurement**

53 193 Structural quality was calculated at the facility level, while indices for process attributes and client  
54  
55 194 satisfaction were made at individual women level.

1  
2  
3 195 **Outcome variable:** the outcome variable was ANC client satisfaction, and computed by  
4 196 aggregating women's responses to a series of questions regarding the ANC visit using a principal  
5 197 components analysis.

8  
9 198 During the analysis, important assumptions including Bartlett's Test of Sphericity, Kaiser-Meyer-  
10 199 Olkin (KMO) measure of sampling adequacy, and communalities scores were checked. The  
11 200 Eigenvalue >1 was used to decide the number of latent variables that we did for extracting factors.  
12 201 Initially, 24 variables were considered for the analysis but eventually, 12 variables were dropped  
13 202 as they failed to meet the assumptions of PCA. An index was computed from the original variables  
14 203 retained in the process. Thus, we computed a summed index from the retained items of the  
15 204 components that explained 68% of the total variances.

16 205 Finally, the overall satisfaction index was developed by categorizing the sum of scores into a three-  
17 206 point Likert scale: 0-50% as 'low satisfaction' (coded 1), 51-79 % (coded 2) as having 'moderate  
18 207 satisfaction', and 80-100 % (coded 3) as 'high satisfaction'

## 208 **Main explanatory variables**

### 209 **Structural attributes:**

210 A facility inventory checklist with 47 items was used to assess the structural attributes of the  
211 health facilities. Each item was scored '1' if the item was available and functional and a score of  
212 '0' if this was not the case. The items in each construct were then added together, with equal  
213 weights, to generate the following five indices: 1) an infrastructure index (7 items); 2) Health Staff  
214 index (8 variables); 3) an equipment index (10 items); 4) Index for drugs and vaccines (14 items);  
215 and 5) index for lab capacity and supplies (8 items) (supplementary file 1). Finally, we categorized  
216 each index into three categories: poor structure quality, fair and good structure quality.  
217 Furthermore, the overall summary score was constructed by aggregating the mean scores of all the  
218 five dimensions of care and was set as the structure index.

### 219 **Process attributes**

220 The process attributes comprised interpersonal and technical aspects of the provider-client  
221 interaction. Interpersonal aspects included issues such as greeting, maintenance of privacy, and  
222 handling of client concerns. Technical aspects included observation of specific services performed,  
223 such as history-taking, ANC physical examinations, counseling related to pregnancy, and  
224 laboratory examinations.

1  
2  
3 225 A scoring system was established to calculate five dimensions of process attributes from 46 items:  
4  
5 226 (a) interpersonal communication(6 activities), (b) history taking(12 activities); (c) clinical  
6  
7 227 examination (9 activities); (d) counseling(10 activities); and (f) health screening and preventive  
8  
9 228 measures(9 services) (supplementary file 2). This scoring system categorizes whether an accepted  
10  
11 229 standard of quality has been met or not.

12  
13 230 All the procedures/activities provided were weighted equally and was granted “1” if the activity  
14  
15 231 was observed and performed according to accepted standards of care, and a score of ‘0’ if this was  
16  
17 232 not the case. The scores of the key items for each individual client-provider interaction being  
18  
19 233 observed were added up and averaged to determine a score for each dimension of care.  
20  
21 234 Furthermore, the overall summary score was constructed by aggregating the mean scores of all the  
22  
23 235 dimensions of care and was set as the process index. The total scores ranged between 0- 46.  
24  
25 236 Accordingly, the process of quality care was scored as follows: Low quality <23, Moderate quality  
26  
27 237 23- <37, and High quality  $\geq 37$ .

### 27 238 **Other explanatory variables**

28  
29 239 Other variables included were: i) Facility type, (ii) demographics, (iii) socio-economic, and (iv)  
30  
31 240 reproductive characteristics of the women.

32  
33 241 The Cronbach’s alpha was used to measure the internal consistency of a set of items for the three  
34  
35 242 quality dimensions, and a reliability coefficient of 0.70 or higher was considered acceptable[37].

### 36 37 243 **Data analysis**

38  
39  
40 244 The collected data were entered using the Epi-info version 7.0 and analyzed using STATA  
41  
42 245 software version 14.0. Owing to the ordinal nature of the outcome variable(low, medium, and high  
43  
44 246 satisfaction ), a typical approach was to use the standard ordered logit [38]. Yet, the Brant test  
45  
46 247 revealed that the proportional odds assumptions were not fulfilled for some independent variables  
47  
48 248 ( $\chi^2=63.4$  df (16);  $p < 0.001$ ). We, therefore, used a generalized ordered logistic regression with  
49  
50 249 auto fit, (also called partial proportional odds model) for assessing the association between  
51  
52 250 satisfaction and explanatory variables.

53  
54 251 The partial proportional odds model is a hybrid of ordinal regression (same coefficients across the  
55  
56 252 categories) and the default gologit (different coefficients across categories). Hence, since the Brant

1  
2  
3 253 test was not met, the analysis gave two odds ratios for an explanatory variable [Low vs.  
4 254 medium/high Satisfaction (OR1) and low/medium vs. high satisfaction (OR2)]. Whereas for  
5 255 variables that did not violate the proportional odds assumption a single odds ratio, OR1 = OR2  
6  
7 256 (OR1 = 2) reported [38].  
8  
9

10  
11 257 The bivariable gologit model was used for variable inclusion in the final multivariable model.  
12  
13 258 Accordingly, the independent variables to be included in the multivariable model were selected  
14  
15 259 when the p-value was <0.2 in the bivariable model. Before running the multivariable analysis  
16  
17 260 multi-collinearity test between independent variables was done using the Variance Inflation Factor  
18  
19 261 (VIF), and variables were not strongly correlated (the highest value was 2.7).

20  
21 262 The final multivariable model was applied to define adjusted odds ratios (ORs), measuring the  
22  
23 263 effect of different determinants on being assigned to a higher satisfaction category. Statistical  
24  
25 264 significance for the final model was set at  $P < 0.05$ .

## 26 265 **Patient and public involvement**

27  
28  
29 266 Patients/public were not involved in setting the research question or the outcome measures, and in  
30  
31 267 the design and implementation of the study. Participation was voluntary based and no incentives  
32  
33 268 were provided. The findings of this study will be disseminated to policy-makers and local-level  
34  
35 269 service implementers.  
36

## 37 270 **RESULTS**

### 38 39 271 **General characteristics of women**

40  
41  
42 272 Out of 824 eligible clients, 795 enrolled in the study yielding a response rate of 96.5%. The highest  
43  
44 273 percentage of women were rural residents 575 (72.3%), and belonging to the age range of 20-29  
45  
46 274 years 433(54.5%). Regarding their age, the mean and standard deviation were 27.8 and 5.9 years,  
47  
48 275 respectively. Of the total respondents, 63.4% did not attend formal education.

49  
50 276 About one-third of the participants, 274(34.5) were first-time visitors for ANC, and more than half  
51  
52 277 of the women interviewed had their first ANC visit during their second trimester of pregnancy  
53  
54 278 (Table 1).  
55  
56  
57  
58  
59  
60

279 Table1: Background characteristics of ANC clients interviewed in public health facilities of West Gojjam  
 280 Zone, Northwest Ethiopia (N=795)  
 281

| Description                           | Number | Percent |
|---------------------------------------|--------|---------|
| Address                               |        |         |
| Urban                                 | 220    | 27.7    |
| Rural                                 | 575    | 72.3    |
| Age (Years)                           |        |         |
| 15-19                                 | 91     | 11.4    |
| 20-29                                 | 433    | 54.5    |
| 30-39                                 | 236    | 29.7    |
| 40+                                   | 35     | 4.4     |
| Education                             |        |         |
| No formal Education                   | 504    | 63.4    |
| Primary Education (Grade 1-8)         | 212    | 26.7    |
| Secondary education and above         | 79     | 9.9     |
| Occupation                            |        |         |
| Farmer                                | 575    | 72.3    |
| Employee                              | 35     | 4.4     |
| Merchant                              | 53     | 6.7     |
| Daily laborer                         | 18     | 2.3     |
| Others(*including Housewives)         | 114    | 14.3    |
| Parity                                |        |         |
| Nulliparous                           | 182    | 22.9    |
| Primipara 1                           | 190    | 23.9    |
| Para 2-4                              | 321    | 40.4    |
| Para 5+                               | 102    | 12.8    |
| Gestational age at time of the survey |        |         |
| 0-3 months                            | 79     | 9.9     |
| 4-7 months                            | 562    | 70.7    |
| >=8 months                            | 154    | 19.4    |
| Number of ANC visits                  |        |         |
| 1                                     | 274    | 34.5    |
| 2-3                                   | 436    | 54.8    |
| 4+                                    | 85     | 10.7    |
| Timing of first ANC visit             |        |         |
| First trimester                       | 332    | 41.8    |
| Second Trimester                      | 419    | 52.7    |
| Third Trimester                       | 44     | 5.5     |
| Distance to HCF                       |        |         |
| Less than 1 hour                      | 532    | 66.9    |
| Greater or equal to 1 hour            | 263    | 33.1    |

282  
 283  
 284  
 285

### Health workers background characteristics

286 As can be seen in Table 2, forty-one health workers who worked for 15 public health facilities  
 287 were included in the study. The largest number of health workers observed in any one-health

288 facility was four and the smallest was one. Most of the health providers were men (61%). The  
 289 median age of these health professionals was 29.0 years (range: 23 to 36 years) and the median  
 290 year of professional experience was 3.0 years (range: 1 to 12 years). This is an indication that most  
 291 of the providers had worked in their organization long enough to understand and give valuable  
 292 information to pregnant women (Table 2).

293 Table 2: Background characteristics of maternal health workers in public health facilities of West Gojjam  
 294 Zone, Northwest Ethiopia (N=41)  
 295

| Characteristics                                                 | Number            | Percent |
|-----------------------------------------------------------------|-------------------|---------|
| Sex of the provider                                             |                   |         |
| Male                                                            | 25                | 61      |
| Female                                                          | 16                | 39      |
| Median Age (Range)                                              | 29.0(23-36 years) |         |
| Median Experience (Range)                                       | 3.0(1-12 years)   |         |
| Training received on;                                           |                   |         |
| ANC screening                                                   | 22                | 53.7    |
| Counseling                                                      | 21                | 51.2    |
| BEmONC                                                          | 27                | 65.9    |
| Hypertension management                                         | 20                | 48.8    |
| HIV/PMTCT                                                       | 32                | 78.0    |
| CRC                                                             | 18                | 43.9    |
| Personally supervised by the supervisor in the last 3<br>Months |                   |         |
| Yes                                                             | 15                | 36.6    |
| No                                                              | 26                | 63.4    |

296 Note: CRC= compassionate and respectful care; BEmONC= Basic emergency obstetrics and newborn  
 297 care; ANC= Antenatal care; PMTCT=Prevention of mother to child transmission  
 298

### 299 Structural quality attributes

300 The analysis presented in table 3 characterizes the structural and process dimensions of ANC  
 301 quality, respectively. Despite there exists heterogeneity in the availability of different components,  
 302 the summary scores of the facility surveys were reasonably good (70 %). Laboratory consumables  
 303 were more likely to be available (80%) compared to other structural components. Nonetheless, the  
 304 availability of infrastructure and general amenities was particularly deficient (59%). Some  
 305 essential antenatal drugs such as magnesium sulfate, injectable antibiotics, and antihypertensive  
 306 drugs were not available during the time of the survey (64%) (Table3).

307 Table3: Results of structural and process quality components of antenatal care in selected public  
 308 health facilities of Northwest Ethiopia.  
 309



| ANC Quality Dimension                                     | Subgroups                                       | Mean Quality score |
|-----------------------------------------------------------|-------------------------------------------------|--------------------|
| <b>Structural Attributes<br/>(Health facility survey)</b> | Minimum: 0.00-Max: 1.00                         |                    |
|                                                           | Number of health facilities                     | 15                 |
|                                                           | Availability of infrastructure                  | 0.59               |
|                                                           | Availability of essential equipment             | 0.77               |
|                                                           | Availability of staff, guidelines, and job-aids | 0.71               |
|                                                           | Availability of Drugs and vaccines              | 0.64               |
|                                                           | Availability of diagnostic tests/Lab supplies   | 0.80               |
|                                                           | <b>Total structural Score</b>                   | <b>0.70</b>        |
| <b>Process Attributes<br/>(Observational studies)</b>     | Minimum: 0.00-Max: 1.00                         |                    |
|                                                           | Number of pregnant women                        | 795                |
|                                                           | Interpersonal performance                       | 0.60               |
|                                                           | Technical skills                                | 0.69               |
|                                                           | - History taking                                | 0.73               |
|                                                           | - Clinical examination                          | 0.70               |
|                                                           | - Counseling                                    | 0.69               |
|                                                           | - Laboratory examinations & preventive measures | 0.63               |
|                                                           | <b>Total process Score</b>                      | <b>0.65</b>        |

310  
311 The availability of basic antenatal care items on the day of the survey varied widely by type of  
312 facility, with hospitals generally better in the number of items to provide comprehensive antenatal  
313 care. Some items were universally available across facility types, such as suction apparatus  
314 (81.5%) and gloves (94.1 %). However, items such as manual vacuum extractor and calcium  
315 gluconate in the health centers and insecticide-treated bed nets (ITNs) in hospitals were extremely  
316 deficient (**Supplementary file 1**). The Cronbach's alpha value of all the items measuring structural  
317 attributes of ANC quality was 0.74.

### 318 **Process quality attributes:**

#### 319 **Interpersonal performance**

320 Generally, interpersonal aspects of quality were extremely low (average score of 60%), especially  
321 concerning warm greeting and welcoming the client (49.9%) and self-introduction of the provider  
322 (38.9%). However, this aspect was better in maintaining the privacy of women during the time of  
323 consultation (i.e. both visual and auditory), which was observed in 80% of the consultations.

#### 324 **Technical performances**

1  
2  
3 325 The number of essential ANC services received by the surveyed women, on average, was  
4 326 inadequate (60%). Looking in detail at the results of different dimensions, we found that some  
5 327 aspects of technical performance scored poorly, especially health screening (63%) and counseling  
6 328 (69%). However, eliciting the general history of pregnant women was rather better, 73% (Table  
7 329 3).

11  
12  
13 330 There were variations in the frequency of carrying out a clinical examination and laboratory tests.  
14 331 While some examinations were done regularly (e.g., weighing, blood pressure measurement, and  
15 332 abdominal palpation), other tests or activities such as hemoglobin, urinalysis, and deworming were  
16 333 done less often. For example, only 64% of the women were checked for anemia. Regrettably, only  
17 334 2.3% of them received all essential laboratory tests and preventive medicines recommended by the  
18 335 Federal Ministry of Health of Ethiopia. Among all the tests and interventions, screening for  
19 336 asymptomatic bacteriuria (31.5%) and intervention for deworming (17.7%) were among the  
20 337 lowest, compared to the HIV test (93%) (**Supplementary file 2**). The Cronbach's alpha value of  
21 338 all the items measuring process attributes of ANC quality was 0.74.

### 29 339 **Client Satisfaction**

30  
31 340 The respondent's level of agreement on the various aspects of antenatal care service satisfaction  
32 341 was expressed on a scale ranging from 1 to 5. As can be seen in table 4 the mean level of  
33 342 satisfaction ranged from 2.54 for the information received about breastfeeding after birth) to 3.71  
34 343 (for those who reported their level of satisfaction about the advice they obtained about vaginal  
35 344 bleeding).

36  
37 345 Overall scores among the respondents revealed that 241(30.3%) of the clients were highly  
38 346 satisfied, 302(38.0%) were moderately satisfied, and almost one-third, 252(31.7%) were  
39 347 unsatisfied. The mean satisfaction score was 3.11, which is approximately equivalent to neutral on  
40 348 the five-point Likert scale. The items were checked for reliability using Cronbach's alpha internal  
41 349 consistency coefficient and the overall alpha value was 0.81

42  
43  
44 350 Table 4: level of satisfaction of pregnant women visiting public health care facilities in Northwest  
45 351 Ethiopia.

46  
47  
48  
49  
50  
51  
52  
53  
54 352

353

| <b>Satisfaction</b>                                                                   |                           |                      |                        |                         |                              |             |           |
|---------------------------------------------------------------------------------------|---------------------------|----------------------|------------------------|-------------------------|------------------------------|-------------|-----------|
| <b>To what extent you agree with the following statements:</b>                        | <b>Very satisfied (%)</b> | <b>Satisfied (%)</b> | <b>Indifferent (%)</b> | <b>Dissatisfied (%)</b> | <b>Very dissatisfied (%)</b> | <b>Mean</b> | <b>SD</b> |
| The health workers in this facility are very friendly and approachable                | 6.8                       | 57.2                 | 34.0                   | 2.0                     | 0                            | 3.69        | 0.626     |
| The health staff are courteous and respectful                                         | 4.5                       | 40.8                 | 42.4                   | 11.5                    | 0.9                          | 3.37        | 0.778     |
| The treatment and/or advice I received from the health worker is optimal              | 3.5                       | 28.4                 | 49.2                   | 11.6                    | 5.3                          | 3.12        | 0.874     |
| The provider gives me opportunities to express the concerns I have                    | 2.0                       | 24.4                 | 54.0                   | 17.0                    | 2.6                          | 3.06        | 0.773     |
| The provider gave me chances to ask him/her questions                                 | 1.6                       | 21.4                 | 48.6                   | 23.3                    | 5.2                          | 2.91        | 0.843     |
| I am well informed on the birth preparedness                                          | 0.5                       | 17.6                 | 59.5                   | 21.1                    | 1.3                          | 2.95        | 0.675     |
| I am informed about breastfeeding after birth                                         | -                         | 2.1                  | 56.1                   | 35.0                    | 6.8                          | 2.54        | 0.654     |
| I am told about how to recognize and proceed in case of vaginal bleeding              | 5.2                       | 62.9                 | 30.0                   | 1.9                     | 0.1                          | 3.71        | 0.595     |
| I am told about how to recognize and proceed in case of fever                         | 0.6                       | 28.7                 | 45.0                   | 18.4                    | 7.3                          | 2.97        | 0.887     |
| I'm told about how to recognize and proceed in case of premature uterine contractions | 1.0                       | 12.7                 | 62.1                   | 18.9                    | 5.3                          | 2.85        | 0.739     |
| I am told about how to recognize and proceed in case of severe headache               | 0.2                       | 24.2                 | 66.4                   | 9.2                     | --                           | 3.15        | 0.566     |
| I'm told about how to recognize and proceed in case of difficulty in breathing        | 0.6                       | 12.8                 | 69.4                   | 15.0                    | 2.1                          | 2.95        | 0.622     |
| Average satisfaction                                                                  |                           |                      |                        |                         |                              | 3.11        | 0.72      |
| <b>Overall satisfaction</b>                                                           |                           |                      |                        |                         |                              |             |           |
| <b>High satisfaction</b>                                                              | 241 (30.3%)               |                      |                        |                         |                              |             |           |
| <b>Moderate satisfaction</b>                                                          | 302 (38.0%)               |                      |                        |                         |                              |             |           |
| <b>Low satisfaction</b>                                                               | 252 (31.7%)               |                      |                        |                         |                              |             |           |

354 *Note: 1=very dissatisfied, 2=dissatisfied, 3=indifferent, 4=satisfied, 5=very satisfied; SD=standard*  
 355 *deviation*

### 356 **Factors associated with client satisfaction**

357 As stated earlier in the methods section we applied the multivariable partial proportional odds  
 358 regression model to examine the determinants of the overall satisfaction of pregnant women on  
 359 the antenatal healthcare service received. During the analysis, the three-scale dependent variable  
 360 produced two panels: panel-one (i.e., low vs. moderate/ high satisfaction); and panel two (low  
 361 /moderate vs. high satisfaction). In each group, the lower values were recoded to "0", while the  
 362 highest values were recorded to "1". A positive coefficient (equivalent to  $OR > 1$ ) implied that  
 363 increases in the explanatory variable led to higher levels of client satisfaction, while negative  
 364 coefficient ( $OR < 1$ ) means that increase in the explanatory value led to less satisfaction [38].

1  
2  
3 365 The Brant test of parallel lines assumption ( $\chi^2=63.4$  df (16);  $p < 0.001$ ) revealed that women's  
4 366 education, number of ANC visits, distance to a health facility, and index for clinical examination  
5 367 were the variables that failed to meet assumption. For these variables, the coefficient estimates and  
6 368 odds ratios were intended to differ in the two panels (categories) (Supplementary file 3).

7  
8  
9  
10  
11 369 After adjusting for all the covariates, significant differences in the ANC service satisfaction was  
12 370 observed by process quality indicators and socio-demographic factors. Residence, distance to a  
13 371 health facility, women's, education, number of ANC visits, and gestational age appeared to be  
14 372 important predictors of satisfaction with antenatal care. Moreover, process quality indicators such  
15 373 as history taking, clinical examination, counseling, and health screening also remained significant  
16 374 in the final model ( $p < 0.05$ ).

17  
18  
19  
20  
21  
22 375 As women's educational status, number of ANC visits, distance to the healthcare facility, and  
23 376 clinical examination did not satisfy the proportional odds assumption (the Brant test),  $aOR_1 \neq aOR_2$   
24 377 and separate interpretations at each category were therefore required for these variables. Hence,  
25 378  $aOR_1$  stands for panel one (low vs. moderate or high) while  $aOR_2$  was for the second panel (low/  
26 379 moderate vs. high satisfaction

27  
28  
29  
30  
31 380 In this regard, women with better schooling [ $aOR_1=3.11(95\% \text{ CI } 2.02, 4.81)$ ], and those with  
32 381 increased number of ANC visits [ $aOR_1 = 4.16 (95\% \text{ CI } 1.66, 10.23)$ ] were significantly associated  
33 382 with increased odds of having moderate or high satisfaction, but no significant difference observed  
34 383 for low/moderate vs. high scores. However, the findings revealed that living within 60 minutes  
35 384 walking distance significantly reduced the odds of being satisfied [low vs. moderate/high scores,  
36 385  $aOR_1 = 0.29 (95\% \text{ CI } 0.18, 0.46)$ ] though it failed to achieve statistical significance in the second  
37 386 category[ low/moderate vs. high scores].

38  
39  
40  
41  
42  
43 387  
44 388 Being better in clinical examination of the process dimension was positively and significantly  
45 389 associated with the two satisfaction categories [Low vs. moderate/high:  $aOR_1 = 1.69 (95\% \text{ CI } 1.13,$   
46 390  $2.54)$ ], and [low/moderate vs.high: $aOR_2=4.09(95\% \text{ CI } 2.69, 6.24)$ ]. As can be seen in Table 5, the  
47 391 effects became much stronger when satisfaction level moved from low to high category.

48  
49  
50  
51  
52 392 However, variables that did not violate the assumption had a single beta coefficient at each of the  
53 393 two satisfaction categories; and hence a single  $aOR_1 = 2$  was reported. Client satisfaction was  
54 394 associated with better process scores. Better scores in history taking [ $aOR_1 = aOR_2; 1.81 (95\% \text{ CI}$

1.25, 2.60)], counseling performance [aOR<sub>1</sub> = aOR<sub>2</sub>; 1.89 (95% CI 1.33, 2.69)], and health screening and preventive measures [aOR<sub>1</sub> = 2; 18.10 (95% CI 11.52, 28.39)] were associated with achieving higher ANC satisfaction scores.

Similarly, being a rural resident was significantly associated with achieving a higher satisfaction score [aOR<sub>1</sub> = aOR<sub>2</sub>; 1.89 (95% CI 1.05, 3.41)]. For every one month increase in gestational age of a pregnancy, however, the odds of having above a particular satisfaction category was decreased by a factor of 0.87 [OR<sub>1</sub> = OR<sub>2</sub>; 0.87 (95% CI 0.78, 0.97)] (Table 5).

Table 5: multivariable partial proportional odds model showing factors affecting ANC satisfaction in West Gojjam Zone, Northwest Ethiopia (n=795)

| Explanatory Variables                                                               | Outcome variables (panels) |                                    |                         |                    |
|-------------------------------------------------------------------------------------|----------------------------|------------------------------------|-------------------------|--------------------|
|                                                                                     | Panel One (1 Vs. 2 and 3)  |                                    | Panel Two (1or 2 Vs 3)  |                    |
|                                                                                     | aOR 1 (95%CI)              | Coefficients not varying(OR1=OR2 ) | aOR2(95%CI)             | Overall P-value(s) |
| Education of women<br>- Attended at least primary education<br>- No schooling[Ref]) | <b>3.11(2.02,4.81)*</b>    |                                    | 1.34(0.97,1.86)         | <b>0.001/0.073</b> |
| Number of ANC visits<br>- >=4<br>- <4 visits[Ref])                                  | <b>4.16(1.66,10.23)*</b>   |                                    | 0.99(0.51,1.95)         | <b>0.002/0.996</b> |
| Walking distance to HCF<br>- < 1 hour<br>- >=1 hour [Ref])                          | <b>0.29(0.18,0.46)*</b>    |                                    | 0.64(0.39,1.04)         | <b>0.001/0.072</b> |
| Clinical examination<br>- At least fair<br>- Poor[Ref])                             | <b>1.69(1.13,2.54)*</b>    |                                    | <b>4.09(2.69,6.24)*</b> | <b>0.011/0.001</b> |
| Address (Rural, Urban[Ref])                                                         |                            | <b>1.89(1.05,3.41)*</b>            |                         | <b>0.035</b>       |
| Age in years<br>- Greater or equal to 20<br>- 15-19[Ref])                           |                            | 1.10(0.80,1.50)                    |                         | 0.561              |
| Parity<br>- Para 1+<br>- Nulliparous[Ref])                                          |                            | 0.80(0.63,1.01)                    |                         | 0.065              |
| Gestational age in months(Cont.)                                                    |                            | <b>0.87(0.78,0.97)*</b>            |                         | <b>0.01</b>        |
| Service year of providers (year)(Cont.)                                             |                            | 0.99(0.93,1.07)                    |                         | 0.95               |
| Supervision received in the last 3 months<br>- Yes                                  |                            | 1.34(0.80,2.26)                    |                         | 0.264              |

|                                                                                |  |                                 |  |              |
|--------------------------------------------------------------------------------|--|---------------------------------|--|--------------|
| - No [Ref])                                                                    |  |                                 |  |              |
| Infrastructure<br>- At least fair,<br>- Poor[Ref])                             |  | 0.78(0.56,1.08)                 |  | 0.138        |
| Drug availability<br>- At least fair<br>- Poor[Ref])                           |  | 0.95(0.70,1.28)                 |  | 0.728        |
| Interpersonal index<br>- At least fair<br>- Poor[Ref])                         |  | 1.16(0.88,1.54)                 |  | 0.291        |
| History taking<br>- At least fair,<br>- Poor[Ref])                             |  | <b>1.81(1.25,2.60)*</b>         |  | <b>0.002</b> |
| Counseling performance<br>- At least fair<br>- Poor[Ref])                      |  | <b>1.89(1.33,2.69)*</b>         |  | <b>0.001</b> |
| Laboratory tests and preventive<br>measures<br>- At least fair<br>- Poor[Ref]) |  | <b>18.09(11.52,28.39)<br/>*</b> |  | <b>0.001</b> |

Note. \* indicates < 5 % level of significance; 1=low satisfaction; 2= moderate satisfaction; and 3= high satisfaction; Ref= reference category.

## DISCUSSION

In this study, we analyzed a comprehensive range of structural and process-related factors and some individual characteristics associated with ANC's satisfaction. The study identified critical gaps in the quality of routine antenatal care and women's satisfaction with antenatal care was low at public health facilities. The contents of antenatal services covered during client-provider interaction were the main factors affecting their satisfaction. The study also revealed that community features (e.g. residency) and individual women's characteristics including women's education, number of ANC visits, and gestational age appeared to be important predictors of satisfaction. However, we get hardly any significant relationship between structural attributes and client satisfaction.

Client satisfaction with the quality of antenatal care services, as noted by Mai Do and colleagues, has been increasingly recognized as an important outcome for the healthcare delivery system[39]. Nonetheless, our study found that only 30% of clients had high levels of satisfaction. This proportion of satisfaction was less than the findings in South Ethiopia (32%), Uganda (40%), and

1  
2  
3 422 Oman (59%) [29, 40-42]. This lower figure is a serious concern given that low satisfaction may  
4  
5 423 adversely affect women's willingness to return and seek care for subsequent maternal services  
6  
7 424 including skilled birth and postnatal care[22].  
8

9 425 Furthermore, our results revealed that all the dimensions of process quality including, history  
10  
11 426 taking, physical examination, counseling, and screening had positively significant impacts on  
12  
13 427 client satisfaction. Similar findings were also reported by other studies, which indicated a positive  
14  
15 428 association between clinical quality characteristics and client satisfaction [29, 43]. A study  
16  
17 429 conducted in India, for example, reaffirmed the importance of adequate clinical examinations in  
18  
19 430 defining clients' expectations and helping to establish trust between the client and providers [44].  
20

21 431 It is, however, worth noting that there was no statistically significant association between client  
22  
23 432 satisfaction and all the structural aspects of care, which is consistent with results obtained in  
24  
25 433 previous studies [39, 45, 46]. This would seem to imply that the mere existence of services is not  
26  
27 434 a guarantee to bring satisfaction. Contrary to our findings, however, others [43, 47] showed the  
28  
29 435 positive influence of structural quality indicators on client satisfaction.  
30

31 436 The available literature on the associations between maternal education and client satisfaction  
32  
33 437 reported inconclusive results. Chemir and colleagues from Ethiopia reported a negative association  
34  
35 438 between maternal education and service satisfaction [48]. Our study, on the contrary, showed that  
36  
37 439 better-educated women had a higher level of satisfaction than their counterparts did. This finding  
38  
39 440 is similar to that of Rahman and colleagues in Malaysia [40] who argued that educated women are  
40  
41 441 more aware of the actual procedures to expect during antenatal care.  
42

43 442 Rural-urban divides of residence had a significant impact on client satisfaction, as was a distance  
44  
45 443 to the nearest health facility. We found a significant difference in levels of satisfaction between  
46  
47 444 urban and rural residents, with the highest satisfaction achieved among rural than urban dwellers.  
48  
49 445 Moreover, living within an hour walking distance to the clinic was significantly associated with  
50  
51 446 lower satisfaction. The result of this study is consistent with other studies [29, 49, 50]. Women  
52  
53 447 from rural areas, who also are supposed to live in the far distance, are more likely to have lower  
54  
55 448 expectations owing to their previous experience of healthcare and lower chance of exposure to  
56  
57 449 health care information, and therefore they tend to value service they are offered and more likely  
58  
59 450 to report higher levels of satisfaction [49].  
60

1  
2  
3 451 Reproductive-related factors such as the number of antenatal visits and gestational age showed a  
4 452 significant association with client satisfaction. Women who made four or more antenatal visits  
5 453 were positively and significantly associated with the low vs moderate or high satisfactions category  
6 454 despite the association turned insignificant in the low or medium vs. high satisfaction category. A  
7 455 previous study conducted in Southern Ethiopia has also reported a similar finding[29]. The positive  
8 456 association in this regard could be due to developing awareness through repeated visiting. Besides,  
9 457 the repeated ANC visits could further improve the relationship between providers and women in  
10 458 a positive direction, which in turn made them feel good towards the services [51].

11  
12 459 Another notable finding in this study was the inverse relation between gestation age and level of  
13 460 satisfaction. The possible reason for this negative association could be related to the fact that the  
14 461 late trimester is a time when more complications can occur[52]. These complications could let  
15 462 expectant mothers demand extra care and support; hence, they might be dissatisfied if the service  
16 463 was not to their expectations.

17  
18 464 Despite the important findings evolved in the present study, some caution needs to be taken in  
19 465 interpreting the results as our study had the following limitations. First, our study assessed the  
20 466 satisfaction level of pregnant women who attended public facilities only; yet, the degree of  
21 467 satisfaction for women who attended private facilities might be rather different from our findings.

22  
23 468 Second, the presence of an observer during the client-provider interaction could generate bias  
24 469 through the Hawthorne effect. Nonetheless, the data collector spent more time at each health care  
25 470 facility and observed many client consultations for each provider. In relation to this, Leonard et al.  
26 471 reported that the quality of health workers' performance increased by 20% on average when being  
27 472 observed but that was only temporary and 10-15 observations later the behavior of the providers  
28 473 became normative[53].

29  
30 474 Third, social desirability bias might also be a concern in cases that women in exit interviews feel  
31 475 they need to respond in a way expected of them. Yet, satisfaction was measured using a summary  
32 476 of the client's responses to a series of questions, which is less subjective than asking a single  
33 477 question. In addition, the use of interviewers who were not affiliated with the surveyed facilities  
34 478 might have mitigated against this.



1  
2  
3 479 Finally, we have been constrained by the lack of consistency in defining quality in the existing  
4  
5 480 literature. Hence, the definition we used could not be refined to certain variables listed by the  
6  
7 481 researchers. The unmeasured factors, however, might have influenced the client's satisfaction as  
8  
9 482 well.

## 10 11 483 **CONCLUSIONS**

12  
13 484 The women's satisfaction towards antenatal care in public facilities was suboptimal and was  
14  
15 485 dependent on an interplay of factors at various levels. A significant contribution to the variation in  
16  
17 486 client satisfaction was mainly attributed to factors related to the contents of the care received than  
18  
19 487 do structural attributes.

20  
21 488 Indeed, the study suggests that availing inputs may not be enough to ensure in bringing client  
22  
23 489 satisfaction. Rather, providers may need further supporting mechanisms to offer ANC that clients  
24  
25 490 regard as satisfactory. In so doing, facilities will increase the levels of providers' performance and  
26  
27 491 client satisfaction, and improve the overall quality of care offered at public health facilities.  
28  
29 492 Finally, the context of this study was an exclusively public health facility setting. Therefore, future  
30  
31 493 studies linking different health system complexities would add value to the evidence generated by  
32  
33 494 our study.

34  
35 495 **Acknowledgments:** The authors would like to acknowledge the study participants, the data  
36  
37 496 collectors, and supervisors who made this research possible.

38  
39 497 **Author Contributions:** AAE, GDA, and GTD conceived and designed this study; AAE, GDA,  
40  
41 498 and GTD participated in the data analysis and the interpretation of the findings. AAE wrote the  
42  
43 499 first draft of the manuscript and; AAE, GDA, and GTD made a critical review of the manuscript.  
44  
45 500 All authors read, edited, and approved the final manuscript.

46  
47 501 **Funding:** This work was supported by Bahir Dar University [grant number: RCS/252/09].

48  
49 502 **Disclaimer:** The funders had no roles in study design, fieldwork, data analysis, interpretation, and  
50  
51 503 decision to publish the manuscript.

52  
53 504 **Competing interests:** None declared.

54  
55 505 **Patient consent for publication:** Not required.

1  
2  
3 506 **Ethics approval:** the study received ethical approval from the Ethical Review Board of Bahir Dar  
4 507 University (protocol no.: 087/18-04). A formal letter of permission was granted from the Amhara  
5 508 Regional Health Bureau and line offices. The person in charge of each facility and care providers  
6 509 were informed and their agreement received before the onset of data collection. Moreover, all the  
7 510 study participants were informed about the purpose of the study, their right to refuse, and assurance  
8 511 of confidentiality. Then, informed verbal informed consent was obtained from each study  
9 512 participant. Personal identifiers were excluded from the data collection form to maintain privacy  
10 513 and confidentiality.

11 514  
12 515 **Provenance and peer review:** Not commissioned; externally peer-reviewed.

13 516 **Data sharing statement:** All data relevant to the study are included in the article or uploaded as  
14 517 supplementary information.

## 15 518 REFERENCES

- 16 519 1. Kanyangarara M, Munos MK, Walker N. Quality of antenatal care service provision in health  
17 520 facilities across sub-Saharan Africa: Evidence from nationally representative health facility assessments.  
18 521 *Journal of global health.* 2017;7(2).
- 19 522 2. World Health Organization. Consultation on improving measurement of the quality of maternal,  
20 523 newborn and child care in health facilities: World Health Organization,; 2014. Available from:  
21 524 [https://www.who.int/maternal\\_child\\_adolescent/documents/measuring-care-quality/en/](https://www.who.int/maternal_child_adolescent/documents/measuring-care-quality/en/).
- 22 525 3. WHO. WHO recommendations on antenatal care for a positive pregnancy experience. World  
23 526 Health Organization Geneva, Switzerland; 2016.
- 24 527 4. Raven JH, Tolhurst RJ, Tang S, Van Den Broek N. What is quality in maternal and neonatal health  
25 528 care? *Midwifery.* 2012;28(5):e676-e83.
- 26 529 5. World Health Organization. Trends in maternal mortality 2000 to 2017: estimates by WHO,  
27 530 UNICEF. UNFPA, World Bank Group and the United Nations Population Division; 2019.
- 28 531 6. Central Statistical Agency (CSA) [Ethiopia] and ICF. 2016 Ethiopia Demographic and Health  
29 532 Survey Key Findings. Addis Ababa, Ethiopia, and Rockville, Maryland, USA. CSA and ICF, 2017.
- 30 533 7. Say L, Chou D, Gemmill A, Tunçalp Ö, Moller A-B, Daniels J, et al. Global causes of maternal  
31 534 death: a WHO systematic analysis. *The Lancet Global Health.* 2014;2(6):e323-e33.
- 32 535 8. Osungbade KO, Ayinde OO. Maternal complication prevention: evidence from a case-control  
33 536 study in southwest Nigeria. *African journal of primary health care & family medicine.* 2014;6(1):1-7.
- 34 537 9. Kerber KJ, de Graft-Johnson JE, Bhutta ZA, Okong P, Starrs A, Lawn JE. Continuum of care for  
35 538 maternal, newborn, and child health: from slogan to service delivery. *The Lancet.* 2007;370(9595):1358-  
36 539 69.
- 37 540 10. Finlayson K, Downe S. Why do women not use antenatal services in low-and middle-income  
38 541 countries? A meta-synthesis of qualitative studies. *PLoS medicine.* 2013;10(1):e1001373.
- 39 542 11. World Health Organization. Daily iron supplementation in adult women and adolescent girls.  
40 543 Geneva, Switzerland. 2016. Available from:

- 1  
2  
3 544 [https://www.who.int/nutrition/publications/micronutrients/guidelines/daily\\_iron\\_supp\\_womenandgirls/en/](https://www.who.int/nutrition/publications/micronutrients/guidelines/daily_iron_supp_womenandgirls/en/).
- 4 545
- 5 546 12. Horn F, Sabova L, Pinterova E, Hornova J, Trnka J. Prevention of neural tube defects by folic acid-
- 6 547 awareness among women of childbearing age in Slovakia. *Bratislavske lekarske listy*. 2014;115(2):91-7.
- 7 548 13. World Health Organization. Service availability and readiness assessment (SARA): an annual
- 8 549 monitoring system for service delivery: reference manual: World Health Organization; 2013. Available
- 9 550 from: [https://www.who.int/healthinfo/systems/sara\\_reference\\_manual/en/](https://www.who.int/healthinfo/systems/sara_reference_manual/en/).
- 10 551 14. Medhanyie A, Spigt M, Kifle Y, Schaay N, Sanders D, Blanco R, et al. The role of health extension
- 11 552 workers in improving utilization of maternal health services in rural areas in Ethiopia: a cross sectional
- 12 553 study. *BMC health services research*. 2012;12(1):352.
- 13 554 15. Primary health care systems (PRIMASYS): case study from Ethiopia, abridged version. Geneva:
- 14 555 World Health Organization; 2017. Licence: CC BY-NC-SA 3.0 IGO.
- 15 556 16. EPHI, FMOH, WHO. Ethiopia Service Availability and Readiness Assessment: 2016 Summary
- 16 557 Report. Addis Ababa Ethiopia. January 2016 [https://www.washinhcf.org/documents/Final-SARA-](https://www.washinhcf.org/documents/Final-SARA-Report-Jan-2017.pdf)
- 17 558 [Report-Jan-2017.pdf](https://www.washinhcf.org/documents/Final-SARA-Report-Jan-2017.pdf) Access date: Nov 30,2017.
- 18 559 17. Brizuela V, Leslie HH, Sharma J, Langer A, Tunçalp Ö. Measuring quality of care for all women
- 19 560 and newborns: how do we know if we are doing it right? A review of facility assessment tools. *The*
- 20 561 *Lancet Global Health*. 2019;7(5):e624-e32.
- 21 562 18. Braithwaite J, Hibbert P, Blakely B, Plumb J, Hannaford N, Long JC, et al. Health system
- 22 563 frameworks and performance indicators in eight countries: a comparative international analysis. *SAGE*
- 23 564 *open medicine*. 2017;5:2050312116686516.
- 24 565 19. Sheffel A, Karp C, Creanga AA. Use of Service Provision Assessments and Service Availability and
- 25 566 Readiness Assessments for monitoring quality of maternal and newborn health services in low-income
- 26 567 and middle-income countries. *BMJ global health*. 2018;3(6):e001011.
- 27 568 20. Larson E, Sharma J, Bohren MA, Tunçalp Ö. When the patient is the expert: measuring patient
- 28 569 experience and satisfaction with care. *Bulletin of the World Health Organization*. 2019;97(8):563.
- 29 570 21. Donabedian A. The quality of care: how can it be assessed? *Jama*. 1988;260(12):1743-8.
- 30 571 22. Tunçalp Ö, Were W, MacLennan C, Oladapo O, Gülmezoglu A, Bahl R, et al. Quality of care for
- 31 572 pregnant women and newborns—the WHO vision. *BJOG: an international journal of obstetrics &*
- 32 573 *gynaecology*. 2015;122(8):1045-9.
- 33 574 23. Sharma J, Leslie HH, Kundu F, Kruk ME. Poor quality for poor women? Inequities in the quality of
- 34 575 antenatal and delivery care in Kenya. *PloS one*. 2017;12(1).
- 35 576 24. Afulani PA, Phillips B, Aborigo RA, Moyer CA. Person-centred maternity care in low-income and
- 36 577 middle-income countries: analysis of data from Kenya, Ghana, and India. *The Lancet Global Health*.
- 37 578 2019;7(1):e96-e109.
- 38 579 25. Heredia-Pi I, Servan-Mori E, Darney BG, Reyes-Morales H, Lozano R. Measuring the adequacy of
- 39 580 antenatal health care: a national cross-sectional study in Mexico. *Bulletin of the World Health*
- 40 581 *Organization*. 2016;94(6):452.
- 41 582 26. Desalegn DM, Abay S, Taye B. The availability and functional status of focused antenatal care
- 42 583 laboratory services at public health facilities in Addis Ababa, Ethiopia. *BMC research notes*.
- 43 584 2016;9(1):403.
- 44 585 27. Alemu Y, Aragaw A. Early initiations of first antenatal care visit and associated factor among
- 45 586 mothers who gave birth in the last six months preceding birth in Bahir Dar Zuria Woreda North West
- 46 587 Ethiopia. *Reproductive health*. 2018;15(1):203.
- 47 588 28. Ewunetie AA, Munea AM, Meselu BT, Simeneh MM, Meteku BT. DELAY on first antenatal care
- 48 589 visit and its associated factors among pregnant women in public health facilities of Debre Markos town,
- 49 590 North West Ethiopia. *BMC pregnancy and childbirth*. 2018;18(1):173.

- 1  
2  
3 591 29. Lakew S, Ankala A, Jemal F. Determinants of client satisfaction to skilled antenatal care services  
4 592 at Southwest of Ethiopia: a cross-sectional facility based survey. *BMC pregnancy and childbirth*.  
5 593 2018;18(1):479.
- 6 594 30. Hanefeld J, Powell-Jackson T, Balabanova D. Understanding and measuring quality of care:  
7 595 dealing with complexity. *Bulletin of the World Health Organization*. 2017;95(5):368.
- 8 596 31. West Gojjam Zone Health Office. The 2016/17 Fiscal Year Annual performance report of West  
9 597 Gojjam Zone, Finote Selam ; July, 2017.
- 10 598 32. Turner AG, Angeles G, Tsui AO, Wilkinson M, Magnani R. Sampling manual for facility surveys for  
11 599 population, maternal health, child health and STD programs in developing countries. 2000.
- 12 600 33. Emiru AA, Alene GD, Debelew GT. Women's retention on the continuum of maternal care  
13 601 pathway in west Gojjam zone, Ethiopia: multilevel analysis. *BMC Pregnancy and Childbirth*. 2020;20:1-  
14 602 14.
- 15 603 34. Emiru AA, Alene GD, Debelew GT. The role of maternal health care services as predictors of time  
16 604 to modern contraceptive use after childbirth in Northwest Ethiopia: Application of the shared frailty  
17 605 survival analysis. *PloS one*. 2020;15(2):e0228678.
- 18 606 35. Langlois ÉV, Miszkurka M, Zunzunegui MV, Ghaffar A, Ziegler D, Karp I. Inequities in postnatal  
19 607 care in low-and middle-income countries: a systematic review and meta-analysis. *Bulletin of the World  
20 608 Health Organization*. 2015;93:259-70G.
- 21 609 36. FMOH. Basic Emergency obstetric and Newborn Care (BEmONC) training manual. Federal  
22 610 Democratic Republic of Ethiopia Ministry of Health , Addis Ababa, Ethiopia, 2013.
- 23 611 37. Hair J, Black WC, Babin BJ, Anderson RE. *Multivariate data analysis: International version*. New  
24 612 Jersey, Pearson. 2010.
- 25 613 38. Williams R. Generalized ordered logit/partial proportional odds models for ordinal dependent  
26 614 variables. *The Stata Journal*. 2006;6(1):58-82.
- 27 615 39. Do M, Wang W, Hembling J, Ametepi P. Quality of antenatal care and client satisfaction in Kenya  
28 616 and Namibia. *International Journal for Quality in Health Care*. 2017;29(2):183-93.
- 29 617 40. Rahman MM, Ngadan DP, Arif MT. Factors affecting satisfaction on antenatal care services in  
30 618 Sarawak, Malaysia: evidence from a cross sectional study. *SpringerPlus*. 2016;5(1):725.
- 31 619 41. Tetui M, Ekirapa EK, Bua J, Mutebi A. Quality of Antenatal care services in eastern Uganda:  
32 620 implications for interventions. *Pan African Medical Journal*. 2012;13(1).
- 33 621 42. Ghobashi M, Khandekar R. Satisfaction among expectant mothers with antenatal care services in  
34 622 the Musandam Region of Oman. *Sultan Qaboos University Medical Journal*. 2008;8(3):325.
- 35 623 43. Onyeajam DJ, Xirasagar S, Khan MM, Hardin JW, Odutolu O. Antenatal care satisfaction in a  
36 624 developing country: a cross-sectional study from Nigeria. *BMC public health*. 2018;18(1):368.
- 37 625 44. Rani M, Bonu S, Harvey S. Differentials in the quality of antenatal care in India. *International  
38 626 journal for quality in health care*. 2007;20(1):62-71.
- 39 627 45. Tafese F, Woldie M, Megerssa B. Quality of family planning services in primary health centers of  
40 628 Jimma Zone, Southwest Ethiopia. *Ethiopian journal of health sciences*. 2013;23(3):245-54.
- 41 629 46. Tancred T, Schellenberg J, Marchant T. Using mixed methods to evaluate perceived quality of  
42 630 care in southern Tanzania. *International journal for quality in health care*. 2016;28(2):233-9.
- 43 631 47. Owili PO, Muga MA, Mendez BR, Chen B. Quality of care in six sub-Saharan Africa countries: a  
44 632 provider-based study on adherence to WHO's antenatal care guideline. *International Journal for Quality  
45 633 in Health Care*. 2018;31(1):43-8.
- 46 634 48. Chemir F, Alemseged F, Workneh D. Satisfaction with focused antenatal care service and  
47 635 associated factors among pregnant women attending focused antenatal care at health centers in Jimma  
48 636 town, Jimma zone, South West Ethiopia; a facility based cross-sectional study triangulated with  
49 637 qualitative study. *BMC research notes*. 2014;7(1):164.

- 1  
2  
3 638 49. Tran TK, Gottvall K, Nguyen HD, Ascher H, Petzold M. Factors associated with antenatal care  
4 639 adequacy in rural and urban contexts-results from two health and demographic surveillance sites in  
5 640 Vietnam. *BMC health services research*. 2012;12(1):40.  
6 641 50. Adeyinka O, Jukic AM, McGarvey ST, Muasau-Howard BT, Hawley NL. Predictors of prenatal care  
7 642 satisfaction among pregnant women in American Samoa. *BMC pregnancy and childbirth*.  
8 643 2017;17(1):381.  
9 644 51. Birhanu Z, Assefa T, Woldie M, Morankar S. Determinants of satisfaction with health care  
10 645 provider interactions at health centres in central Ethiopia: a cross sectional study. *BMC health services*  
11 646 *research*. 2010;10(1):78.  
12 647 52. Roomruangwong C, Kanchanatawan B, Sirivichayakul S, Maes M. High incidence of body image  
13 648 dissatisfaction in pregnancy and the postnatal period: Associations with depression, anxiety, body mass  
14 649 index and weight gain during pregnancy. *Sexual & Reproductive Healthcare*. 2017;13:103-9.  
15 650 53. Leonard K, Masatu MC. Outpatient process quality evaluation and the Hawthorne Effect. *Social*  
16 651 *science & medicine*. 2006;63(9):2330-40.

19  
20 652

21  
22 653

**Supplementary file 1: Availability and functionality of items among hospitals and health centers offering antenatal care services in West Gojjam Zone, Northwest Ethiopia.**

| No       | Items per dimension                                                               | Facility Type     |                         | Total<br>(n=15) |
|----------|-----------------------------------------------------------------------------------|-------------------|-------------------------|-----------------|
|          |                                                                                   | Hospital<br>(n=5) | Health center<br>(n=10) |                 |
| <b>1</b> | <b>Availability of infrastructure (7)</b>                                         |                   |                         |                 |
|          | ▪ Water within the compound                                                       | 5                 | 5                       | 10              |
|          | ▪ Electricity from any source (e.g. electricity grid, generator, solar, or other) | 5                 | 5                       | 10              |
|          | ▪ Ambulance/any vehicle for emergence (available free of charges)                 | 4                 | 4                       | 8               |
|          | ▪ Functioning landline telephone or a mobile phone supported by the facility      | 5                 | 6                       | 11              |
|          | ▪ Functioning computer                                                            | 4                 | 6                       | 10              |
|          | ▪ Internet access within the facility                                             | 1                 | ---                     | 1               |
|          | ▪ Separate room for ANC consultations with auditory and visual privacy            | 5                 | 8                       | 13              |
|          | <b>Group average</b>                                                              |                   |                         | <b>9</b>        |
| <b>2</b> | <b>Essential equipment(10)</b>                                                    |                   |                         |                 |
|          | ▪ Blood pressure apparatus                                                        | 5                 | 8                       | 13              |
|          | ▪ Stethoscope                                                                     | 5                 | 9                       | 13              |
|          | ▪ Thermometer                                                                     | 4                 | 7                       | 11              |
|          | ▪ Adult scale(Functional)                                                         | 8                 | 5                       | 12              |
|          | ▪ Fetoscope                                                                       | 5                 | 10                      | 15              |
|          | ▪ Gloves( non-sterile)                                                            | 5                 | 10                      | 15              |
|          | ▪ Gloves sterile                                                                  | 5                 | 9                       | 14              |
|          | ▪ Vacuum aspiration equipment (MVA) set                                           | 5                 | 3                       | 8               |
|          | ▪ Suction apparatus                                                               | 5                 | 7                       | 12              |
|          | ▪ MUAC Tape mother                                                                | 3                 | 6                       | 9               |
|          | <b>Group average</b>                                                              |                   |                         | <b>12</b>       |
| <b>3</b> | <b>Availability of essential drugs and vaccines (14)</b>                          |                   |                         |                 |

|   |                                                           |          |           |           |           |
|---|-----------------------------------------------------------|----------|-----------|-----------|-----------|
|   | • Tetanus toxoid                                          | 5        | 10        | 15        |           |
|   | • Iron/ Folic acid                                        | 4        | 9         | 13        |           |
|   | • IV fluids(of any type)                                  | 5        | 7         | 12        |           |
|   | • Magnesium sulfate (injection)                           | 3        | ---       | 3         |           |
|   | • Calcium gluconate                                       | 2        | -----     | 2         |           |
|   | • Antiretroviral drugs                                    | 5        | 4         | 9         |           |
|   | • Insecticide treated bed nets                            | -----    | 2         | 2         |           |
|   | • Anti-malaria drugs (Quartum, Quinine, and other)        | 4        | 7         | 11        |           |
|   | • Anti-helminthes (mebendazole or others)                 | 5        | 9         | 14        |           |
|   | • Cotrimoxazole                                           | 5        | 8         | 13        |           |
|   | • Parenteral antibiotics                                  | 5        | 3         | 8         |           |
|   | • Methyldopa or propranolol or any other antihypertensive | 5        | 3         | 8         |           |
|   | • Diazepam (injection)                                    | 4        | 5         | 9         |           |
|   | • Parenteral oxytocic                                     | 5        | 10        | 15        |           |
|   | <b>Group average</b>                                      |          |           | <b>10</b> |           |
| 4 | Diagnostic Capacities (8)                                 |          |           |           |           |
|   | ▪ Urine pregnancy test (HCG)                              | 4        | 5         | 9         |           |
|   | ▪ Hemoglobin test                                         | 4        | 6         | 10        |           |
|   | ▪ Blood and Rh grouping                                   | 5        | 8         | 13        |           |
|   | ▪ .Malaria diagnostic capacity                            | 5        | 9         | 14        |           |
|   | ▪ Proteinuria test                                        | 5        | 7         | 12        |           |
|   | ▪ RPR for Syphilis                                        | 4        | 8         | 12        |           |
|   | ▪ HIV test                                                | 5        | 8         | 13        |           |
|   | ▪ Urinalysis for bacteriuria                              | 5        | 8         | 13        |           |
|   | <b>Group average</b>                                      |          |           | <b>12</b> |           |
| 5 | Staffing and guidelines/job aids                          | Standard | Available | Standard  | Available |

|            |                                            |    |          |               |     |           |
|------------|--------------------------------------------|----|----------|---------------|-----|-----------|
| <b>I</b>   | <b>Staffing</b>                            |    |          |               |     |           |
|            | Generalist(non-specialist) medical doctors | 14 | 5        | 1             | --- | 5         |
|            | Gynecologist and obstetrician              | 2  | -----    |               |     | ----      |
|            | Health officer                             |    |          | 2             | 10  | 10/10     |
|            | Nurses of all categories                   | 97 | 1        | 5             | 10  | 11        |
|            | Midwives                                   | 13 | 4        | 3             | 8   | 12        |
|            | Laboratory technicians/technologists       | 10 | 5        | 2             | 10  | 15        |
|            | Pharmacist or pharmacy technician          | 10 | 4        | 3             | 9   | 13        |
| <b>II.</b> | <b>ANC checklists and/job aids</b>         |    | Hospital | Health center |     |           |
|            |                                            |    | 4        | 7             |     | 11        |
|            | <b>Group average</b>                       |    |          |               |     | <b>11</b> |
|            | <b>Total structural Score (Average)</b>    |    |          |               |     | <b>11</b> |

Note: MUAC=mid upper arm circumference; ANC=antenatal care; HCG=Human chorion gonadotropin hormone; MVA>manual vacuum aspiration;



**Supplementary file 2: Summary of the procedures and processes of care provided during antenatal visit in west Gojjam Zone, Northwest Ethiopia**

|   | <b>Clinical observation</b>                                                                                                | <b>Facility type</b>        |                                      |                          |
|---|----------------------------------------------------------------------------------------------------------------------------|-----------------------------|--------------------------------------|--------------------------|
| 1 | <b>Interpersonal performance(6)</b>                                                                                        | <b>Hospital<br/>(n=130)</b> | <b>Health<br/>Center<br/>(n=665)</b> | <b>Total<br/>(n=795)</b> |
| 1 | The health worker greeted women in a friendly way                                                                          | 62                          | 335                                  | 397                      |
| 2 | The health worker introduced him self                                                                                      | 49                          | 260                                  | 309                      |
| 3 | The health worker called the client by name                                                                                | 77                          | 291                                  | 368                      |
| 4 | The health worker ensured privacy (visual and auditory)                                                                    | 103                         | 533                                  | 636                      |
| 5 | The health worker encouraged women to ask questions                                                                        | 99                          | 576                                  | 675                      |
| 6 | Gave attention to what the woman talks about                                                                               | 78                          | 398                                  | 476                      |
|   | <b>Average</b>                                                                                                             |                             |                                      | <b>477</b>               |
| 2 | <b>Technical performance(40)</b>                                                                                           |                             |                                      |                          |
| A | <b>History taking(12)</b>                                                                                                  |                             |                                      |                          |
| 1 | The health worker asked or checked client card about her age                                                               | 97                          | 525                                  | 622                      |
| 2 | The health worker asked about number of previous pregnancies                                                               | 100                         | 513                                  | 613                      |
| 3 | The health worker asked about duration of present pregnancy                                                                | 102                         | 555                                  | 657                      |
| 4 | The health worker asked about the previous obstetric history, if relevant (such as stillbirth, abortion, neonatal loss...) | 82                          | 436                                  | 518                      |
| 5 | The health worker asks asked about any co-morbidity( hypertension, diabetic mellitus)                                      | 86                          | 438                                  | 524                      |
| 6 | The health worker asked whether the woman feel fetal movements, if relevant [consider gestational age and parity]          | 96                          | 472                                  | 568                      |
|   | Asks whether she has experienced any of the following for current pregnancy:                                               |                             |                                      |                          |

|                                                         |                                                         |     |     |            |
|---------------------------------------------------------|---------------------------------------------------------|-----|-----|------------|
| 7                                                       | Vaginal bleeding                                        | 96  | 510 | 606        |
| 8                                                       | Fever                                                   | 92  | 471 | 563        |
| 9                                                       | Severe headaches and/or blurred vision                  | 99  | 518 | 617        |
| 10                                                      | Swollen face or hands                                   | 104 | 541 | 645        |
| 11                                                      | Convulsions or loss of consciousness                    | 72  | 402 | 474        |
| 12                                                      | Severe abdominal pain                                   | 94  | 467 | 561        |
|                                                         | <b>Average</b>                                          |     |     | 580        |
| <b>B Clinical Examination (9)</b>                       |                                                         |     |     |            |
| 1                                                       | Check body weight                                       | 95  | 484 | 579        |
| 2                                                       | Take blood pressure                                     | 91  | 455 | 546        |
| 3                                                       | Measured mid upper arm circumference (MUAC)             | 60  | 348 | 408        |
| 4                                                       | Check signs of anemia                                   | 84  | 432 | 516        |
| 5                                                       | Check for edema                                         | 102 | 452 | 554        |
|                                                         | Performs the following steps for abdominal examination: |     |     |            |
| 6                                                       | Inspect abdomen                                         | 108 | 556 | 664        |
| 7                                                       | Palpate abdomen for size and fetal position             | 111 | 574 | 685        |
| 8                                                       | measure fundal height with measuring tape               | 78  | 414 | 492        |
| 9                                                       | Checks fetal heart rate with fetoscope                  | 92  | 474 | 566        |
|                                                         | <b>Average</b>                                          |     |     | <b>557</b> |
| <b>C Laboratory tests &amp; preventive measures (9)</b> |                                                         |     |     |            |
| <b>Laboratory examinations(6)</b>                       |                                                         |     |     |            |
| 1                                                       | urine protein test                                      | 120 | 379 | 499        |
| 2                                                       | Urinalysis for bacteriuria                              | 39  | 211 | 250        |

|          |                                                               |     |     |            |
|----------|---------------------------------------------------------------|-----|-----|------------|
| 3        | Hemoglobin or Hematocrit                                      | 76  | 379 | 455        |
| 4        | Blood grouping (ABO type and Rhesus factor)                   | 98  | 469 | 567        |
| 5        | Test for Human immune-deficiency virus (HIV)                  | 120 | 619 | 739        |
| 6        | Syphilis test using rapid plasma regain( RPR )                | 74  | 373 | 447        |
|          | <b>Preventive measures(3)</b>                                 |     |     |            |
| 7        | check for anemia and prescribed iron/folic acid               | 117 | 575 | 692        |
| 8        | Deworming checked and given if eligible                       | 26  | 115 | 141        |
| 9        | Tetanus toxoid immunization status is checked and given       | 117 | 605 | 722        |
|          | <b>Average</b>                                                |     |     | <b>501</b> |
| <b>D</b> | <b>Counselling given on the following topics(10)</b>          |     |     |            |
| 1        | Advantages of facility delivery                               | 95  | 476 | 571        |
| 2        | Birth preparedness & emergency readiness                      | 100 | 503 | 603        |
| 3        | Diet and nutrition                                            | 106 | 556 | 662        |
| 4        | Personal hygiene and self-care                                | 94  | 465 | 559        |
| 5        | Importance of bed-nets                                        | 68  | 505 | 573        |
| 6        | Information on signs of true labor                            | 78  | 385 | 463        |
| 7        | postpartum family planning                                    | 61  | 316 | 377        |
| 8        | Mother to child transmission of HIV and its prevention        | 106 | 550 | 656        |
| 9        | Counsel on sexually transmitted infections including syphilis | 75  | 377 | 452        |
| 10       | Danger signs of pregnancy and actions to be taken             | 102 | 472 | 574        |
|          | <b>Average for counseling</b>                                 |     |     | <b>549</b> |
|          | <b>Average for technical performance</b>                      |     |     | <b>475</b> |

**Supplementary file 3: Brant test of parallel regression assumption using the 5 percent level of significance**

| SN | Variables                                                  | P- value      |
|----|------------------------------------------------------------|---------------|
| 1  | Address                                                    | 0.5174        |
| 2  | Age of women                                               | 0.0760        |
| 3  | Educational status                                         | <b>0.0007</b> |
| 4  | Distance to health facility                                | <b>0.0036</b> |
| 5  | Number of live births                                      | 0.6005        |
| 6  | Gestational Age at the time survey                         | 0.1948        |
| 7  | Number of ANC visits                                       | <b>0.0075</b> |
| 8  | Service Year of the provider                               | 0.6578        |
| 9  | Supervision received by the provider                       | 0.1059        |
| 10 | Availability of Physical infrastructure( composite index ) | 0.2240        |
| 11 | Availability of essential drugs ( composite index )        | 0.3239        |
| 12 | Interpersonal communication ( composite index )            | 0.3559        |
| 13 | Skills in history taking ( composite index )               | 0.5167        |
| 14 | Skills in physical examination ( composite index )         | <b>0.0005</b> |
| 15 | Counseling skills ( composite index )                      | 0.8421        |
| 16 | Health Screening ( composite index )                       | 0.1398        |

*Note: A significant test statistic provides evidence that the parallel regression assumption has not been fulfilled.*

STROBE Statement—Checklist of items that should be included in reports of *cross-sectional studies*

|                              | Item No | Recommendation                                                                                                                                                                                    | Page No  |
|------------------------------|---------|---------------------------------------------------------------------------------------------------------------------------------------------------------------------------------------------------|----------|
| <b>Title and abstract</b>    | 1       | (a) Indicate the study's design with a commonly used term in the title or the abstract                                                                                                            | 2        |
|                              |         | (b) Provide in the abstract an informative and balanced summary of what was done and what was found                                                                                               | 2        |
| <b>Introduction</b>          |         |                                                                                                                                                                                                   |          |
| Background/rationale         | 2       | Explain the scientific background and rationale for the investigation being reported                                                                                                              | 2-5      |
| Objectives                   | 3       | State specific objectives, including any prespecified hypotheses                                                                                                                                  | 2        |
| <b>Methods</b>               |         |                                                                                                                                                                                                   |          |
| Study design                 | 4       | Present key elements of study design early in the paper                                                                                                                                           | 5        |
| Setting                      | 5       | Describe the setting, locations, and relevant dates, including periods of recruitment, exposure, follow-up, and data collection                                                                   | 5,6,7    |
| Participants                 | 6       | (a) Give the eligibility criteria, and the sources and methods of selection of participants                                                                                                       | 5        |
| Variables                    | 7       | Clearly define all outcomes, exposures, predictors, potential confounders, and effect modifiers. Give diagnostic criteria, if applicable                                                          | 7,8,9    |
| Data sources/<br>measurement | 8*      | For each variable of interest, give sources of data and details of methods of assessment (measurement). Describe comparability of assessment methods if there is more than one group              | 7,8,9    |
| Bias                         | 9       | Describe any efforts to address potential sources of bias                                                                                                                                         | 6,9,10   |
| Study size                   | 10      | Explain how the study size was arrived at                                                                                                                                                         | 5,6      |
| Quantitative variables       | 11      | Explain how quantitative variables were handled in the analyses. If applicable, describe which groupings were chosen and why                                                                      | 9        |
| Statistical methods          | 12      | (a) Describe all statistical methods, including those used to control for confounding                                                                                                             | 9-10     |
|                              |         | (b) Describe any methods used to examine subgroups and interactions                                                                                                                               | 9-10     |
|                              |         | (c) Explain how missing data were addressed                                                                                                                                                       |          |
|                              |         | (d) If applicable, describe analytical methods taking account of sampling strategy                                                                                                                | 9-10     |
|                              |         | (e) Describe any sensitivity analyses                                                                                                                                                             | 9-10     |
| <b>Results</b>               |         |                                                                                                                                                                                                   |          |
| Participants                 | 13*     | (a) Report numbers of individuals at each stage of study—eg numbers potentially eligible, examined for eligibility, confirmed eligible, included in the study, completing follow-up, and analysed | 10       |
|                              |         | (b) Give reasons for non-participation at each stage                                                                                                                                              | 10       |
|                              |         | (c) Consider use of a flow diagram                                                                                                                                                                |          |
| Descriptive data             | 14*     | (a) Give characteristics of study participants (eg demographic, clinical, social) and information on exposures and potential confounders                                                          | 10,11,12 |
|                              |         | (b) Indicate number of participants with missing data for each variable of interest                                                                                                               | 10,11,12 |
| Outcome data                 | 15*     | Report numbers of outcome events or summary measures                                                                                                                                              | 14       |

1  
2  
3  
4  
5  
6  
7  
8  
9  
10  
11  
12  
13  
14  
15  
16  
17  
18  
19  
20  
21  
22  
23  
24  
25  
26  
27  
28  
29  
30  
31  
32  
33  
34  
35  
36  
37  
38  
39  
40  
41  
42  
43  
44  
45  
46  
47  
48  
49  
50  
51  
52  
53  
54  
55  
56  
57  
58  
59  
60

|                          |    |                                                                                                                                                                                                              |       |
|--------------------------|----|--------------------------------------------------------------------------------------------------------------------------------------------------------------------------------------------------------------|-------|
| Main results             | 16 | (a) Give unadjusted estimates and, if applicable, confounder-adjusted estimates and their precision (eg, 95% confidence interval). Make clear which confounders were adjusted for and why they were included | 15-17 |
|                          |    | (b) Report category boundaries when continuous variables were categorized                                                                                                                                    | 17    |
|                          |    | (c) If relevant, consider translating estimates of relative risk into absolute risk for a meaningful time period                                                                                             | 17    |
| Other analyses           | 17 | Report other analyses done—eg analyses of subgroups and interactions, and sensitivity analyses                                                                                                               | 12-13 |
| <b>Discussion</b>        |    |                                                                                                                                                                                                              |       |
| Key results              | 18 | Summarise key results with reference to study objectives                                                                                                                                                     | 17-19 |
| Limitations              | 19 | Discuss limitations of the study, taking into account sources of potential bias or imprecision. Discuss both direction and magnitude of any potential bias                                                   | 19-20 |
| Interpretation           | 20 | Give a cautious overall interpretation of results considering objectives, limitations, multiplicity of analyses, results from similar studies, and other relevant evidence                                   | 20    |
| Generalisability         | 21 | Discuss the generalisability (external validity) of the study results                                                                                                                                        | 20    |
| <b>Other information</b> |    |                                                                                                                                                                                                              |       |
| Funding                  | 22 | Give the source of funding and the role of the funders for the present study and, if applicable, for the original study on which the present article is based                                                | 21    |

\*Give information separately for exposed and unexposed groups.

**Note:** An Explanation and Elaboration article discusses each checklist item and gives methodological background and published examples of transparent reporting. The STROBE checklist is best used in conjunction with this article (freely available on the Web sites of PLoS Medicine at <http://www.plosmedicine.org/>, Annals of Internal Medicine at <http://www.annals.org/>, and Epidemiology at <http://www.epidem.com/>). Information on the STROBE Initiative is available at [www.strobe-statement.org](http://www.strobe-statement.org).
