# Supplementary material for: Women’s satisfaction with the quality of antenatal care services rendered at public health facilities in Northwest Ethiopia: the application of partial proportional odds model
Source: PubMed Central journal article supplement — BMJ Open. 2020 Sep 17;10(9):e037085. doi: 10.1136/bmjopen-2020-037085 (PMC7500293; doi:10.1136/bmjopen-2020-037085), 2020-09-17
Supplement: bmjopen-2020-037085supp001.pdf [file bmjopen-2020-037085supp001.pdf]

**Supplementary file 1: Availability and functionality of items among hospitals and health centers offering antenatal care services in West Gojjam Zone, Northwest Ethiopia.**

| No       | Items per dimension                                                               | Facility Type     |                         | Total<br>(n=15) |
|----------|-----------------------------------------------------------------------------------|-------------------|-------------------------|-----------------|
|          |                                                                                   | Hospital<br>(n=5) | Health center<br>(n=10) |                 |
| <b>1</b> | <b>Availability of infrastructure (7)</b>                                         |                   |                         |                 |
|          | ▪ Water within the compound                                                       | 5                 | 5                       | 10              |
|          | ▪ Electricity from any source (e.g. electricity grid, generator, solar, or other) | 5                 | 5                       | 10              |
|          | ▪ Ambulance/any vehicle for emergence (available free of charges)                 | 4                 | 4                       | 8               |
|          | ▪ Functioning landline telephone or a mobile phone supported by the facility      | 5                 | 6                       | 11              |
|          | ▪ Functioning computer                                                            | 4                 | 6                       | 10              |
|          | ▪ Internet access within the facility                                             | 1                 | ---                     | 1               |
|          | ▪ Separate room for ANC consultations with auditory and visual privacy            | 5                 | 8                       | 13              |
|          | <b>Group average</b>                                                              |                   |                         | <b>9</b>        |
| <b>2</b> | <b>Essential equipment(10)</b>                                                    |                   |                         |                 |
|          | ▪ Blood pressure apparatus                                                        | 5                 | 8                       | 13              |
|          | ▪ Stethoscope                                                                     | 5                 | 9                       | 13              |
|          | ▪ Thermometer                                                                     | 4                 | 7                       | 11              |
|          | ▪ Adult scale(Functional)                                                         | 8                 | 5                       | 12              |
|          | ▪ Fetoscope                                                                       | 5                 | 10                      | 15              |
|          | ▪ Gloves( non-sterile)                                                            | 5                 | 10                      | 15              |
|          | ▪ Gloves sterile                                                                  | 5                 | 9                       | 14              |
|          | ▪ Vacuum aspiration equipment (MVA) set                                           | 5                 | 3                       | 8               |
|          | ▪ Suction apparatus                                                               | 5                 | 7                       | 12              |
|          | ▪ MUAC Tape mother                                                                | 3                 | 6                       | 9               |
|          | <b>Group average</b>                                                              |                   |                         | <b>12</b>       |
| <b>3</b> | <b>Availability of essential drugs and vaccines (14)</b>                          |                   |                         |                 |

|   |                                                           |          |           |           |           |
|---|-----------------------------------------------------------|----------|-----------|-----------|-----------|
|   | • Tetanus toxoid                                          | 5        | 10        | 15        |           |
|   | • Iron/ Folic acid                                        | 4        | 9         | 13        |           |
|   | • IV fluids(of any type)                                  | 5        | 7         | 12        |           |
|   | • Magnesium sulfate (injection)                           | 3        | ---       | 3         |           |
|   | • Calcium gluconate                                       | 2        | -----     | 2         |           |
|   | • Antiretroviral drugs                                    | 5        | 4         | 9         |           |
|   | • Insecticide treated bed nets                            | -----    | 2         | 2         |           |
|   | • Anti-malaria drugs (Quartum, Quinine, and other)        | 4        | 7         | 11        |           |
|   | • Anti-helminthes (mebendazole or others)                 | 5        | 9         | 14        |           |
|   | • Cotrimoxazole                                           | 5        | 8         | 13        |           |
|   | • Parenteral antibiotics                                  | 5        | 3         | 8         |           |
|   | • Methyldopa or propranolol or any other antihypertensive | 5        | 3         | 8         |           |
|   | • Diazepam (injection)                                    | 4        | 5         | 9         |           |
|   | • Parenteral oxytocic                                     | 5        | 10        | 15        |           |
|   | <b>Group average</b>                                      |          |           | <b>10</b> |           |
| 4 | Diagnostic Capacities (8)                                 |          |           |           |           |
|   | ▪ Urine pregnancy test (HCG)                              | 4        | 5         | 9         |           |
|   | ▪ Hemoglobin test                                         | 4        | 6         | 10        |           |
|   | ▪ Blood and Rh grouping                                   | 5        | 8         | 13        |           |
|   | ▪ .Malaria diagnostic capacity                            | 5        | 9         | 14        |           |
|   | ▪ Proteinuria test                                        | 5        | 7         | 12        |           |
|   | ▪ RPR for Syphilis                                        | 4        | 8         | 12        |           |
|   | ▪ HIV test                                                | 5        | 8         | 13        |           |
|   | ▪ Urinalysis for bacteriuria                              | 5        | 8         | 13        |           |
|   | <b>Group average</b>                                      |          |           | <b>12</b> |           |
| 5 | Staffing and guidelines/job aids                          | Standard | Available | Standard  | Available |

|            |                                            |    |          |               |     |           |
|------------|--------------------------------------------|----|----------|---------------|-----|-----------|
| <b>I</b>   | <b>Staffing</b>                            |    |          |               |     |           |
|            | Generalist(non-specialist) medical doctors | 14 | 5        | 1             | --- | 5         |
|            | Gynecologist and obstetrician              | 2  | -----    |               |     | ----      |
|            | Health officer                             |    |          | 2             | 10  | 10/10     |
|            | Nurses of all categories                   | 97 | 1        | 5             | 10  | 11        |
|            | Midwives                                   | 13 | 4        | 3             | 8   | 12        |
|            | Laboratory technicians/technologists       | 10 | 5        | 2             | 10  | 15        |
|            | Pharmacist or pharmacy technician          | 10 | 4        | 3             | 9   | 13        |
| <b>II.</b> | <b>ANC checklists and/job aids</b>         |    | Hospital | Health center |     |           |
|            |                                            |    | 4        | 7             |     | 11        |
|            | <b>Group average</b>                       |    |          |               |     | <b>11</b> |
|            | <b>Total structural Score (Average)</b>    |    |          |               |     | <b>11</b> |

Note: MUAC=mid upper arm circumference; ANC=antenatal care; HCG=Human chorion gonadotropin hormone; MVA>manual vacuum aspiration;
