# Supplementary material for: Women’s satisfaction with the quality of antenatal care services rendered at public health facilities in Northwest Ethiopia: the application of partial proportional odds model
Source: PubMed Central journal article supplement — BMJ Open. 2020 Sep 17;10(9):e037085. doi: 10.1136/bmjopen-2020-037085 (PMC7500293; doi:10.1136/bmjopen-2020-037085), 2020-09-17
Supplement: bmjopen-2020-037085supp002.pdf [file bmjopen-2020-037085supp002.pdf]

**Supplementary file 2: Summary of the procedures and processes of care provided during antenatal visit in west Gojjam Zone, Northwest Ethiopia**

|          | <b>Clinical observation</b>                                                                                                | <b>Facility type</b>        |                                      |                          |
|----------|----------------------------------------------------------------------------------------------------------------------------|-----------------------------|--------------------------------------|--------------------------|
| <b>1</b> | <b>Interpersonal performance(6)</b>                                                                                        | <b>Hospital<br/>(n=130)</b> | <b>Health<br/>Center<br/>(n=665)</b> | <b>Total<br/>(n=795)</b> |
| 1        | The health worker greeted women in a friendly way                                                                          | 62                          | 335                                  | 397                      |
| 2        | The health worker introduced him self                                                                                      | 49                          | 260                                  | 309                      |
| 3        | The health worker called the client by name                                                                                | 77                          | 291                                  | 368                      |
| 4        | The health worker ensured privacy (visual and auditory)                                                                    | 103                         | 533                                  | 636                      |
| 5        | The health worker encouraged women to ask questions                                                                        | 99                          | 576                                  | 675                      |
| 6        | Gave attention to what the woman talks about                                                                               | 78                          | 398                                  | 476                      |
|          | <b>Average</b>                                                                                                             |                             |                                      | <b>477</b>               |
| <b>2</b> | <b>Technical performance(40)</b>                                                                                           |                             |                                      |                          |
| <b>A</b> | <b>History taking(12)</b>                                                                                                  |                             |                                      |                          |
| 1        | The health worker asked or checked client card about her age                                                               | 97                          | 525                                  | 622                      |
| 2        | The health worker asked about number of previous pregnancies                                                               | 100                         | 513                                  | 613                      |
| 3        | The health worker asked about duration of present pregnancy                                                                | 102                         | 555                                  | 657                      |
| 4        | The health worker asked about the previous obstetric history, if relevant (such as stillbirth, abortion, neonatal loss...) | 82                          | 436                                  | 518                      |
| 5        | The health worker asks asked about any co-morbidity( hypertension, diabetic mellitus)                                      | 86                          | 438                                  | 524                      |
| 6        | The health worker asked whether the woman feel fetal movements, if relevant [consider gestational age and parity]          | 96                          | 472                                  | 568                      |
|          | Asks whether she has experienced any of the following for current pregnancy:                                               |                             |                                      |                          |

|                                                         |                                                         |     |     |            |
|---------------------------------------------------------|---------------------------------------------------------|-----|-----|------------|
| 7                                                       | Vaginal bleeding                                        | 96  | 510 | 606        |
| 8                                                       | Fever                                                   | 92  | 471 | 563        |
| 9                                                       | Severe headaches and/or blurred vision                  | 99  | 518 | 617        |
| 10                                                      | Swollen face or hands                                   | 104 | 541 | 645        |
| 11                                                      | Convulsions or loss of consciousness                    | 72  | 402 | 474        |
| 12                                                      | Severe abdominal pain                                   | 94  | 467 | 561        |
|                                                         | <b>Average</b>                                          |     |     | 580        |
| <b>B Clinical Examination (9)</b>                       |                                                         |     |     |            |
| 1                                                       | Check body weight                                       | 95  | 484 | 579        |
| 2                                                       | Take blood pressure                                     | 91  | 455 | 546        |
| 3                                                       | Measured mid upper arm circumference (MUAC)             | 60  | 348 | 408        |
| 4                                                       | Check signs of anemia                                   | 84  | 432 | 516        |
| 5                                                       | Check for edema                                         | 102 | 452 | 554        |
|                                                         | Performs the following steps for abdominal examination: |     |     |            |
| 6                                                       | Inspect abdomen                                         | 108 | 556 | 664        |
| 7                                                       | Palpate abdomen for size and fetal position             | 111 | 574 | 685        |
| 8                                                       | measure fundal height with measuring tape               | 78  | 414 | 492        |
| 9                                                       | Checks fetal heart rate with fetoscope                  | 92  | 474 | 566        |
|                                                         | <b>Average</b>                                          |     |     | <b>557</b> |
| <b>C Laboratory tests &amp; preventive measures (9)</b> |                                                         |     |     |            |
| <b>Laboratory examinations(6)</b>                       |                                                         |     |     |            |
| 1                                                       | urine protein test                                      | 120 | 379 | 499        |
| 2                                                       | Urinalysis for bacteriuria                              | 39  | 211 | 250        |

|          |                                                               |     |     |            |
|----------|---------------------------------------------------------------|-----|-----|------------|
| 3        | Hemoglobin or Hematocrit                                      | 76  | 379 | 455        |
| 4        | Blood grouping (ABO type and Rhesus factor)                   | 98  | 469 | 567        |
| 5        | Test for Human immune-deficiency virus (HIV)                  | 120 | 619 | 739        |
| 6        | Syphilis test using rapid plasma regain( RPR )                | 74  | 373 | 447        |
|          | <b>Preventive measures(3)</b>                                 |     |     |            |
| 7        | check for anemia and prescribed iron/folic acid               | 117 | 575 | 692        |
| 8        | Deworming checked and given if eligible                       | 26  | 115 | 141        |
| 9        | Tetanus toxoid immunization status is checked and given       | 117 | 605 | 722        |
|          | <b>Average</b>                                                |     |     | <b>501</b> |
| <b>D</b> | <b>Counselling given on the following topics(10)</b>          |     |     |            |
| 1        | Advantages of facility delivery                               | 95  | 476 | 571        |
| 2        | Birth preparedness & emergency readiness                      | 100 | 503 | 603        |
| 3        | Diet and nutrition                                            | 106 | 556 | 662        |
| 4        | Personal hygiene and self-care                                | 94  | 465 | 559        |
| 5        | Importance of bed-nets                                        | 68  | 505 | 573        |
| 6        | Information on signs of true labor                            | 78  | 385 | 463        |
| 7        | postpartum family planning                                    | 61  | 316 | 377        |
| 8        | Mother to child transmission of HIV and its prevention        | 106 | 550 | 656        |
| 9        | Counsel on sexually transmitted infections including syphilis | 75  | 377 | 452        |
| 10       | Danger signs of pregnancy and actions to be taken             | 102 | 472 | 574        |
|          | <b>Average for counseling</b>                                 |     |     | <b>549</b> |
|          | <b>Average for technical performance</b>                      |     |     | <b>475</b> |
