# Supplementary material for: Women’s satisfaction with the quality of antenatal care services rendered at public health facilities in Northwest Ethiopia: the application of partial proportional odds model
Source: PubMed Central journal article supplement — BMJ Open. 2020 Sep 17;10(9):e037085. doi: 10.1136/bmjopen-2020-037085 (PMC7500293; doi:10.1136/bmjopen-2020-037085), 2020-09-17
Supplement: bmjopen-2020-037085supp003.pdf [file bmjopen-2020-037085supp003.pdf]

**Supplementary file 3: Brant test of parallel regression assumption using the 5 percent level of significance**

| SN | Variables                                                  | P- value      |
|----|------------------------------------------------------------|---------------|
| 1  | Address                                                    | 0.5174        |
| 2  | Age of women                                               | 0.0760        |
| 3  | Educational status                                         | <b>0.0007</b> |
| 4  | Distance to health facility                                | <b>0.0036</b> |
| 5  | Number of live births                                      | 0.6005        |
| 6  | Gestational Age at the time survey                         | 0.1948        |
| 7  | Number of ANC visits                                       | <b>0.0075</b> |
| 8  | Service Year of the provider                               | 0.6578        |
| 9  | Supervision received by the provider                       | 0.1059        |
| 10 | Availability of Physical infrastructure( composite index ) | 0.2240        |
| 11 | Availability of essential drugs ( composite index )        | 0.3239        |
| 12 | Interpersonal communication ( composite index )            | 0.3559        |
| 13 | Skills in history taking ( composite index )               | 0.5167        |
| 14 | Skills in physical examination ( composite index )         | <b>0.0005</b> |
| 15 | Counseling skills ( composite index )                      | 0.8421        |
| 16 | Health Screening ( composite index )                       | 0.1398        |

*Note: A significant test statistic provides evidence that the parallel regression assumption has not been fulfilled.*
